## **Therapeutic anti-PD-L1 antibody affects ESCRT-mediated functions in cells expressing oncogenic EGFR.**

Anudari Letian<sup>1,2</sup>, Eyoel Yemanaberhan<sup>1,3</sup>, Paola Cavaliere<sup>1</sup>, Noah Dephoure<sup>1,4</sup>, Nasser K. Altorki<sup>3,4,5</sup> and Timothy E. McGraw<sup>1,3,4,5\*</sup>

\*corresponding author.

### Affiliations

<sup>1</sup> Department of Biochemistry, Weill Cornell Medicine, New York, NY 10065

<sup>2</sup> Biochemistry, Cell & Molecular Biology Graduate Program, Weill Cornell Medicine, New York, NY 10065

<sup>3</sup> Department of Cardiothoracic Surgery, Weill Cornell Medicine and NY Presbyterian Hospital, New York, NY 10065

<sup>4</sup> Sandra and Edward Meyer Cancer Center, Weill Cornell Medicine and NY Presbyterian Hospital, New York, NY 10065

<sup>5</sup> Neuberger Berman Foundation Lung Cancer Research Center, Weill Cornell Medicine, New York, NY 10065

Word count: 7051 (main text and figure legends)

Disclosures: NKA has equity in Angiocrine Bioscience. TEM receives research funding from Janssen and from Pfizer, Inc. The other authors have nothing to disclose.

## Summary

PD-L1 is a ligand for immune checkpoint receptor PD1. Anti-PD-L1 antibody is an effective therapy for a variety of solid tumors, although a durable response is only achieved in a subset of patients. For unknown reasons, EGFR-mutant tumors respond poorly to checkpoint blockade. Applying quantitative cell biological methods to study PD-L1 biology in lung cancer cells, we establish that growth factors acutely regulate PD-L1 trafficking between the plasma membrane and the interior of cells. Changes in plasma membrane PD-L1 levels will impact PD1 engagement on T cells, thereby influencing PD-L1's immune suppressive activity. To discover potential cell-intrinsic functions of PD-L1, we used APEX2 biotinylation to generate a high-resolution map of the PD-L1 proximal proteome. ESCRT pathway proteins were enriched in PD-L1's proximal proteome, and two ESCRT-dependent functions, turnover of mutant EGFR and biogenesis of extracellular vesicles, were affected by anti-PD-L1 treatment, suggesting a link between PD-L1 and ESCRT function. Proteins that control cytoskeletal dynamics were also enriched in the PD-L1 proteome, and anti-PD-L1 treatment reduced cell migration, identifying migration as a PD-L1 associated function. PD-L1 knockout mimics the effects of the antibody treatment, suggesting anti-PD-L1 antibody effects are loss of function(s). The effects of anti-PD-L1 on the ESCRT-dependent functions and cell migration were restricted to cells harboring oncogenic EGFR mutations. Wildtype and KRAS mutant cells lines were unaffected. Our study reveals new cell-intrinsic roles for PD-L1 in EGFR mutant cells, activities that might contribute to the resistance of EGFR mutant tumors to PD-L1 checkpoint blockade.

## Introduction

Therapies targeting the PD1/PD-L1 checkpoint axis are effective in many cancers, including non-small-cell lung carcinoma (NSCLC)<sup>1,2</sup>. However, only a limited subset of patients shows durable response to anti-PD-L1 antibody ( $\alpha$ -PD-L1) therapy. Expression of PD-L1 by cancer cells does not predict response to  $\alpha$ -PD-L1 therapy, and some molecular subtypes, most notably EGFR mutant tumors, respond poorly to  $\alpha$ -PD-L1 therapy, regardless of PD-L1 expression<sup>3-5</sup>. Thus, despite the well-described role of PD-L1 as a PD1 ligand and the remarkable clinical successes of  $\alpha$ -PD-L1 therapies, there is still much to be learned about PD-L1 biology, particularly its cell intrinsic functions and behavior, information that will provide a context for better understanding response and resistance to  $\alpha$ -PD-L1 therapy.

PD-L1 is a single pass type I transmembrane protein widely expressed on immune cells as well as many non-lymphoid cells, including epithelial cells<sup>6</sup>. Because PD-L1 functions to blunt immune response by binding PD1 on target T cells, regulation of the amount of PD-L1 on the plasma membrane is key for controlling its immune checkpoint activity. A number of transcriptional and post-translational regulatory mechanisms impacting PD-L1 expression have been identified. Numerous cytokines, cell stress stimuli and oncogenes stimulate PD-L1 transcription downstream of several signaling pathways<sup>7-9</sup>. Several modes of post translational regulation have also been identified that impact PD-L1 protein turnover, including regulation of glycosylation, palmitoylation and phosphorylation<sup>10-13</sup>, and proteins specifically involved in determining whether PD-L1 is degraded or not have also been identified (e.g. CMTM6 and HIP1R)<sup>14-16</sup>.

Although PD-L1 as a ligand for PD1 has been the predominant focus of its role in cancers, there is mounting evidence for cell intrinsic functions of PD-L1 that might affect tumor progression independent of PD-L1 binding PD1<sup>17,18</sup>. Along these lines, PD-L1 has been implicated in the regulation of epithelial mesenchymal transition, resistance to chemotherapeutic agents as well as interferon-mediated cell toxicity<sup>17,19-21</sup>. Some of the non-PD1 ligand activities of PD-L1 might be more reflective of PD-L1's role outside of cancer. For example, in a non-cancer setting, PD-L1 expression by non-immune cells might have a major function in protecting healthy cells/tissue from collateral damage at sites of active immune response and these cell-intrinsic PD-L1 activities might be vital for cell survival and tissue healing.

Here we report on the interrogation of PD-L1 biology using quantitative cell biological methods. We report that growth factors, via AKT activation, acutely regulate the distribution of PD-L1 between the plasma membrane and the interior of cells. Growth factor regulation of PD-L1 trafficking is independent of previously described transcriptional upregulation by IFN $\gamma$  and of the control of PD-L1 protein turnover by the CKFL-like MARVEL transmembrane protein 6 (CMTM6)<sup>14,15</sup>. Thus, growth factor modulation of PD-L1 cycling to and from the plasma membrane provides a mechanism for rapid modulation of cell surface levels that augments previously described regulatory mechanisms that control the total amount of PD-L1. We used APEX2 biotinylation mapping to define the proteome in proximity to PD-L1. Proteins

of the ESCRT pathway were enriched in the PD-L1 proximal proteome.  $\alpha$ PD-L1 treatment of cells affected two ESCRT-dependent activities: biogenesis of extracellular vesicles (EVs) and turnover of mutant EGFR. Proteins that control cytoskeleton dynamics were also enriched in the PD-L1 proximal proteome and the cytoskeletal dependent activities of cell-migration were affected by  $\alpha$ -PD-L1 antibody treatment. The effects of  $\alpha$ -PD-L1 treatment were restricted to cells harboring oncogenic EGFR. PD-L1 knockout phenocopied the effects of  $\alpha$ -PD-L1 treatment of EGFR mutant cells, establishing the effects of  $\alpha$ -PD-L1 are due to a loss of PD-L1 function. These data reveal a heretofore undescribed interplay between constitutively active mutant EGFR and  $\alpha$ -PD-L1 treatment. Thus, in EGFR mutant tumors,  $\alpha$ -PD-L1 therapy not only disrupts PD-L1/PD1 interaction but potentially affects cancer cell migration as well as the broader tumor microenvironment downstream of changes in EVs that could impact response to the immune checkpoint therapy.

## Results

### *Intracellular and plasma membrane PD-L1 are in rapid equilibrium regulated by growth factors.*

We used fluorescence microscopy to interrogate the subcellular distribution of PD-L1 in primary human NSCLC cells (Fig 1A). In addition to PD-L1 localized to the plasma membrane detected by staining intact cells, staining of permeabilized primary cells revealed a significant intracellular accumulation of PD-L1. Quantification of the fluorescence revealed that the majority of PD-L1 expressed in primary lung cancer cells was intracellular. Mutant KRAS or EGFR, the two most common driver oncogenes in lung cancer<sup>22</sup>, did not affect this PD-L1 distribution. (Fig 1B). Similarly, in established NSCLC cell lines and a non-transformed human lung epithelial cell line (BEAS-2B), there was a significant intracellular accumulation of PD-L1 that was predominantly concentrated in the peri-nuclear region of cells (Fig 1C). Quantification revealed a nearly equal distribution of PD-L1 between the plasma membrane and the interior of cells, independent of whether the cells were KRAS or EGF receptor (EGFR) mutants (Fig 1D).

Interferon gamma (IFN $\gamma$ ), a potent transcriptional regulator of PD-L1, increased total PD-L1 protein levels in a non-transformed human lung epithelial line (BEAS-2B), an EGFR mutant (H1650) cell line and a KRAS mutant (A549) cell line by approximately 3 fold, without affecting either the distribution of PD-L1 between the interior and surface of cells or the punctate plasma membrane distribution of PD-L1 (Fig 1C, E & F). Immunostaining with Durvalumab, a therapeutic  $\alpha$ -PD-L1 antibody<sup>23,24</sup>, revealed a similar PD-L1 distribution between the plasma membrane and cell interior as the laboratory grade  $\alpha$ -PD-L1 antibody (clone #130021, Novus Biologicals) (Fig 1G).

Plasma membrane localized PD-L1 mediates its immune suppressive function as a ligand for PD1 on target T cells, thereby raising the question of the biological function of the large intracellular accumulation of PD-L1. To explore this question, we first investigated the relationship between plasma membrane and intracellular PD-L1. We used a quantitative fluorescence microscopy assay adapted from our previous studies of membrane trafficking to interrogate the relationship between the plasma membrane and intracellular pools of PD-L1<sup>25</sup>. If these pools are in equilibrium, then when live cells are incubated with a saturating concentration of an antibody that binds to the extracellular domain of PD-L1, the total amount of cell-associated  $\alpha$ -PD-L1 antibody will increase as a function of incubation time. This is observed because the antibody-bound PD-L1 on the plasma membrane is internalized and replaced by recycling of intracellular PD-L1 that is not occupied by the antibody. The cell-associated  $\alpha$ -PD-L1 plateaus when all the PD-L1 in equilibrium with the plasma membrane has been bound by antibody (that is, transited to the plasma membrane). Our analyses demonstrate that intracellular PD-L1 constitutively traffics to the cell surface with a halftime of approximately 10 min, establishing that PD-L1 plasma membrane levels are dynamically maintained by constitutive internalization and recycling back to the plasma membrane (Fig 2A). Furthermore, the maximum amount of cell-associated  $\alpha$ -PD-L1 that is labeled by incubation with antibody in the medium (i.e., the plateau amount) is greater than 90% of the total amount of PD-L1

expressed in cells, demonstrating that greater than 90% of intracellular PD-L1 is in rapid equilibrium with the plasma membrane (Fig 2A). Together these data suggest one function of the intracellular PD-L1 pool is to serve as a reservoir for the plasma membrane pool of PD-L1.

We next determined if the amount of PD-L1 in the plasma membrane can be acutely regulated. Incubation of cells in serum-free medium for 4 hrs resulted in a near 50% depletion of plasma membrane PD-L1 (Fig 2B). This depletion of plasma membrane PD-L1 reflected a redistribution of PD-L1 from the cell surface to intracellular compartments without a significant reduction in total PD-L1 protein (Fig S1A). Replacing the serum with different growth factors (EGF, IGF and insulin) restored plasma membrane PD-L1 levels without affecting the total amount of PD-L1, establishing that growth factors acutely control PD-L1 trafficking to and/or from the plasma membrane and consequently the distribution of PD-L1 between the plasma membrane and the interior of cells (Fig 2B). There were, however, no differences among the 3 growth factors in promoting PD-L1 accumulation on the plasma membrane.

Growth factors are known to regulate membrane protein trafficking downstream of AKT activation<sup>26,27</sup>. We used pharmacologic inhibition of AKT (MK2206) to determine its role in controlling PD-L1 trafficking. Within 4 hours of pharmacologic inhibition of AKT, plasma membrane PD-L1 was reduced by the same degree as induced by serum withdrawal, demonstrating the amount of PD-L1 on the cell surface is dynamically maintained and acutely regulated by AKT activity (Fig 2B).

The effects of serum and AKT on the expression of PD-L1 in the plasma membrane were not due to global changes in membrane protein traffic because the plasma membrane expression of transferrin receptor, a cargo protein of general endocytic recycling, was not affected by either treatment (Fig 2C). Inhibition of AKT induced downregulation of plasma membrane PD-L1 in all NSCLC cell lines examined (Fig 2D, Fig S1B). Thus, the plasma membrane level of PD-L1 is dynamically maintained and regulated by AKT, irrespective of driver oncogene.

Importantly, inhibition of AKT reduced the amount of PD-L1 in the plasma membrane of IFN $\gamma$ -treated cells, demonstrating that the increased total amount of PD-L1 induced by IFN $\gamma$  stimulation remained under the control of AKT regulation (Fig 2E). Consequently, the effects of IFN $\gamma$  and AKT on the amount of PD-L1 in the plasma membrane are independent and additive.

Previous studies have defined a role for CMTM6 in determining the fate of internalized PD-L1<sup>14,15</sup>. In agreement with those studies, transient knockdown of CMTM6 resulted in a 30% reduction of total PD-L1 amounts (Fig 2F, Fig S1C). However, the distribution of the remaining PD-L1 between the plasma membrane and interior of cells was unchanged (Fig 2F). These data establish that the amount of PD-L1 recycled back to the plasma membrane, but not the rate at which it is recycled, is controlled by CMTM6. Furthermore, AKT regulation of PD-L1 recycling is unaffected by depletion of CMTM6, providing

additional evidence that regulation of PD-L1 downstream of CMTM6 is distinct and independent from regulation downstream of AKT (Fig 2G).

### *PD-L1 proximal proteome.*

In addition to PD-L1's function as a PD1 ligand, there is an emerging literature on cell-intrinsic functions of PD-L1<sup>17,18,28</sup>. To provide a context for the further investigation of potential cell-intrinsic roles of PD-L1, we used APEX2 mapping to define the PD-L1 proximal proteome. APEX2 is a peroxidase that specifically oxidizes biotin-phenol to the short-lived phenoxyl radical that reacts with nearby proteins (within a radius of ~20 nm) resulting in their biotinylation<sup>29,30</sup>. The biotinylated proteins are isolated and identified in mass spectrometry to generate an accounting of proteins in the proximity of APEX2. We linked APEX2 enzyme to the cytoplasmic carboxyl-terminus of human PD-L1. Linkage of APEX2 to PD-L1 did not alter PD-L1's distribution between the plasma membrane and the interior of cells or affect AKT regulation of PD-L1 expression in the plasma membrane, data that support the use of the PD-L1-APEX2 for proximity mapping studies (Fig 3A-C).

We generated a proximity map for PD-L1-APEX2 stably expressed in a non-transformed human lung epithelial cell line, BEAS-2B. We identified an overlapping set of 399 proteins biotinylated in 5 independent experiments (Fig 3D, Fig S2A, Table S1). PD-L1 proximal proteins reflect many biological pathways, as anticipated for a protein distributed among several cellular compartments as it constitutively cycles to and from the plasma membrane. Here we focus on 4 of the pathways as discussed below (Fig 3E).

Proteins of the MHC I antigen presentation pathway were enriched among the PD-L1 proximity map proteins, including the MHC I receptor proteins HLA-A, HLA-B and HLA-C (Table S1). We confirmed the proximity of PD-L1 to HLA I by immunofluorescence (Fig 3F, Fig S2B). The specificity of the identified proteins to those in proximity to PD-L1 was supported by the fact that the transferrin receptor was neither enriched in the proximity map nor highly colocalized with PD-L1 by immunofluorescence (Table S1, Fig 3F, Fig S2B). The proximity of PD-L1 and MHC I localizes PD-L1 adjacent to the TCR-MHC I complex formed between T cells and target cells, an organization that would enhance the efficiency of PD-L1 to engage PD1 and blunt T cell activation.

There was also an enrichment of proteins that function in various aspects of membrane protein trafficking, a finding in line with constitutive trafficking of PD-L1 to and from the plasma membrane. More unexpected was the finding that 29% of the PD-L1 proximity map proteins are annotated to cytoskeleton organization, covering a broad range of both actin and microtubule biology (Fig 3E). These results infer a close association of PD-L1 or PD-L1-containing compartments with the actin cytoskeleton, which might have implications for PD-L1 function.

Most notably, APEX2 proximity mapping revealed a highly significant enrichment of proteins involved in EGF receptor signaling and trafficking, including the EGFR and several ESCRT proteins, that controls the turnover of activated EGFR. Supporting these findings EGFR and HGS (a subunit of ESCRT-0 complex) overlap with PD-L1 in immunofluorescence (Fig 3E & F, Fig S2B, Table S2).

#### *[αPD-L1 antibody induces an increase of mutant EGFR](#)*

EGFR and 12 proteins involved in EGFR trafficking and degradation were part of the PD-L1 proximity map (Table S2). As noted above, EGFR activation promotes PD-L1 accumulation on the plasma membrane. However, the other growth factor receptors (insulin receptor and IGF receptor) that can also regulate PD-L1 distribution between the plasma membrane and interior of cells, were not identified in PD-L1 proximity mapping. These findings suggest the possibility of a more direct connection between PD-L1 and EGFR. Finding EGFR and proteins associated with its signaling and trafficking was intriguing because EGFR mutant tumors respond poorly to α-PD-L1 therapy, despite expressing PD-L1<sup>3-5</sup>. Perhaps the reduced response of EGFR mutant tumors is related to a physical or functional interaction between PD-L1 and activated EGFR. To further probe the relationship between EGFR and PD-L1 in the context of PD-L1 therapy, we first determined the effect of α-PD-L1 antibody treatment on EGFR (Fig 4A). Incubation of three different EGFR mutant human NSCLC cell lines for 7 hours with α-PD-L1 antibody caused a significant increase of EGFR protein, whereas similar treatment of two KRAS mutant lines and non-transformed BEAS-2B cells did not affect EGFR protein levels. Of note, the EGFR mutant lines harbor different activating mutations, demonstrating the effect is not linked to a specific EGFR mutation. Additionally, despite differences in PD-L1 expression among the lines, the effect of α-PD-L1 was restricted to cells with oncogenic EGFR. (Fig S3A).

Two α-PD-L1 antibodies, Durvalumab and reagent grade PD-L1 antibody (clone# 130021, Novus Biologicals), which bind different extracellular epitopes of PD-L1, had a similar effect on mutant EGFR levels, demonstrating the effect is not dependent on antibody binding to a specific region/epitope of PD-L1 (Fig 4B). Neither an anti-transferrin receptor antibody, which binds to the extracellular domain of the transferrin receptor, nor a control human IgG antibody, when incubated with cells for 7 hrs, affected the amount of EGFR protein, demonstrating the effect on mutant EGFR is specific for antibodies that bind PD-L1 (Fig 4B & C, Fig S3B). Finally, treatment with an α-PD-L1 Fab (monovalent) caused an increase in EGFR protein, thus proving that the effect of the antibody is not through forced dimerization of PD-L1 (Fig 4D, Fig S3C).

α-PD-L1 antibody treatment did not alter the total amount of PD-L1 nor its cellular distribution in either non-transformed or EGFR mutant human lung epithelial cell lines (Fig 4E&F). In addition, α-PD-L1 treatment did not affect the distribution of the transferrin receptor, demonstrating the treatment did not affect clathrin-mediated endocytosis or constitutive recycling back to the plasma membranes (Fig 4G).

#### *[αPD-L1 antibody reduces degradation of mutant EGFR](#)*



We next knocked-out PD-L1 in an EGFR mutant cell line using CRISPR/CAS9. We focused on EGFR mutant cells because these are the cells that upregulated EGFR in response to  $\alpha$ -PD-L1 treatment. PD-L1 knockout resulted in an increase in mutant EGFR that was reduced to control levels by re-expression of PD-L1 (Fig 4H & I, Fig S3D). These data support the hypothesis that the effect of  $\alpha$ -PD-L1 is not a gain of function induced by antibody binding, but rather that antibody binding disrupts a cell-intrinsic function of PD-L1.

$\alpha$ -PD-L1 treatment did not affect EGFR or PD-L1 mRNA levels, demonstrating a post-transcriptional mechanism is responsible for the increase in mutant EGFR protein levels (Fig 4J & K). Inhibition of translation via cycloheximide (CHX) did not alter the effect of  $\alpha$ -PD-L1 on mutant EGFR levels, supporting the conclusion that  $\alpha$ -PD-L1 inhibits EGFR degradation rather than increases translation of EGFR mRNA (Fig 4L). Accordingly,  $\alpha$ -PD-L1 treatment approximately doubled the half-life of mutant EGFR without an appreciable effect on the half-life of the wildtype EGFR (Fig 4M-O). Consistent with the effect of  $\alpha$ -PD-L1 on mutant EGFR being independent of kinase activity,  $\alpha$ -PD-L1 did not affect the half-life of wildtype EGFR stimulated with EGF or TGF- $\alpha$  (Fig S3E & F). These data indicate that some feature of mutant EGFR biology or the cellular context of EGFR mutant cells is not recapitulated by acute activation of EGFR and is responsible for the effect of  $\alpha$ -PD-L1. However,  $\alpha$ -PD-L1 treatment did not lead to significant differences in AKT or ERK phosphorylation or an increase in transcription of immediate EGFR response genes, providing additional evidence that the  $\alpha$ -PD-L1 effect was not a consequence of altered EGFR signaling (Fig S3G & H).

Prior studies have shown that ligand activated wildtype EGFR and constitutively active mutant EGFR have different intracellular trafficking patterns<sup>31</sup>. One prominent difference between trafficking of wildtype and mutant EGFR is that activated wildtype EGFR is sorted to luminal vesicles of multivesicular late endosomes, followed by degradation in mature lysosomes<sup>32</sup>. Mutant EGFR, despite being active, is poorly trafficked to late endosomes and rather is recycled back to the plasma membrane, thereby avoiding efficient degradation<sup>31,33</sup>. Although unstimulated wildtype EGFR co-localized with PD-L1, this colocalization was significantly decreased upon EGF activation of the wildtype EGFR, presumably because activated wildtype EGFR is targeted for degradation. Mutant EGFR, however, remained co-localized with PD-L1 regardless of ligand stimulation (Fig S3I). Thus, the different effect of  $\alpha$ -PD-L1 on the half-lives of wildtype and mutant EGFR may be due to differences in the trafficking of wildtype and mutant EGFR.

Ubiquitination of activated wildtype EGFR targets it for degradation by a mechanism involving the ESCRT pathway, and although mutant EGFR is ubiquitylated following binding of EGF, ubiquitination is not required for internalization of mutant EGFR<sup>32,34-37</sup>.  $\alpha$ -PD-L1 antibody treatment of cells reduced ubiquitination of both wildtype and mutant EGFR, suggesting differences in EGFR ubiquitination do not

account for the difference in turnover of wildtype and EGFR mutants in cells treated with  $\alpha$ -PD-L1 (Fig 4P & Q).

#### *$\alpha$ PD-L1 antibody treatment effect on the whole cell proteome*

ESCRT proteins were identified in the PD-L1 proximity map (Fig 3E, Table S2). Because  $\alpha$ -PD-L1 affects mutant EGFR turnover and ESCRTs are involved in controlling the turnover of a number of proteins<sup>38</sup>, not just EGFR, we next explored the possibility that  $\alpha$ -PD-L1 treatment has a global effect on protein turnover. To test this hypothesis, we performed whole cell proteomic analysis on wildtype, KRAS and EGFR mutant cells 48 hrs after treatment with therapeutic  $\alpha$ -PD-L1 Durvalumab antibody (Fig 5A). Remarkably, in the EGFR mutant cell line there was an overall increase in the post-to-pre  $\alpha$ -PD-L1 treatment ratios of individual proteins, whereas in wildtype and KRAS mutant cells lines there was a small overall decrease in post to pretreatment ratios (Fig 5A). Mutant EGFR was increased 1.3-fold in whole cell mass spec, whereas wildtype EGFR was unchanged (Table S3). These data demonstrate that  $\alpha$ -PD-L1 treatment does not just affect mutant EGFR but that it has broader effects that are limited to cells with mutant EGFR, revealing the effect is in the context of a cell expressing constitutively active EGFR.

To explore specific biology that might be most affected by  $\alpha$ -PD-L1 treatment we queried the proteins most consistently increased by  $\alpha$ -PD-L1 by applying thresholds of greater than 1.2-fold increase and a coefficient of variance less than 0.1 (lowest quartile of variation between the experiments). Among these proteins, there was an enrichment of proteins involved in immune responses such as cellular response to interferon-beta, regulation of innate immune responses as well as viral release from host cells, suggesting the possibility that PD-L1, in addition to its function as an immune checkpoint ligand, has cell-intrinsic immune-related function intersecting with ESCRT-dependent functions (Fig 5B, Fig S4A). We also detected an enrichment of proteins annotated to cell adhesion and cell polarity, suggesting a role for PD-L1 in regulating cytoskeletal organization (Fig 5C, Fig S4A). Notably, these proteins were unchanged in KRAS and non-transformed cells with  $\alpha$ -PD-L1 antibody treatment (Fig 5B & C, Table S3).

#### *$\alpha$ PD-L1 antibody treatment affects extracellular vesicles*

ESCRTs, in addition to having a key role in targeting EGFR (and other proteins) for lysosomal degradation, are also involved in the formation and secretion of extracellular vesicles (EVs)<sup>39</sup>. To determine the impact of  $\alpha$ -PD-L1 treatment on EVs, we performed proteomic analysis on EVs isolated from the media of non-transformed, KRAS and EGFR mutant lung cell lines with and without  $\alpha$ -PD-L1 treatment.  $\alpha$ -PD-L1 treatment had a pronounced effect on EV biogenesis in EGFR mutant cells compared to KRAS and wildtype cells (Fig 5D & E). There was an increase in a set of 6 canonical EV proteins in EVs isolated from the medium of EGFR mutant cells treated with  $\alpha$ -PD-L1. There was no similar increase of these proteins in EVs isolated from the media of wildtype or KRAS mutant cells incubated with  $\alpha$ -PD-L1 (Fig 5D). The increase of these EV proteins in the extracellular space was higher

than the increase in the whole cell extracts, supporting the hypothesis that  $\alpha$ -PD-L1 treatment enhances EV biogenesis and/or release from EGFR mutant cells (Fig 5D). In addition, there was a striking overall increase of EV cargo proteins from EGFR mutant  $\alpha$ -PD-L1 treated cells, suggesting either enhanced biogenesis of EVs or increased protein packaging into EVs (Fig 5E). Thus, our data establish that  $\alpha$ -PD-L1 treatment affects protein turnover and EV biogenesis, two ESCRT dependent functions.

The proper maturation and acidification of late endosomes is critical for EV biogenesis as well as lysosomal activity<sup>40,41</sup>. We determined that the acidification and maturation of late endosomes/lysosomes in EGFR mutant cells were not affected by  $\alpha$ -PD-L1 treatment, demonstrating that the global effects of  $\alpha$ -PD-L1 treatment on the proteome of EGFR mutant cells was not due to perturbations in lysosomal acidification (Fig S4B-D).

#### *PD-L1 controls cell migration in EGFR mutant cells*

Our APEX2 mapping (Fig 3D), in addition to revealing proximity of PD-L1 to EGFR, also identified an enrichment of proteins that function in cytoskeletal biology. We also identified proteins involved in cell polarity and cell adhesion processes among the ones increased with  $\alpha$ -PD-L1 treatment in EGFR mutant cells. Thus, we next determined whether PD-L1 impacts cytoskeleton-dependent processes.  $\alpha$ -PD-L1 treatment of an EGFR mutant cell line reduced migration measured in a scratch assay and reduced migration assayed in a transwell migration assay (Fig 6A-B, Fig S5A). Treatment with a control IgG antibody did not impact cell migration (Fig 6C). Furthermore, prolonged  $\alpha$ -PD-L1 treatment did not affect total cell levels of PD-L1, demonstrating the effect of antibody is not through induced degradation and loss of PD-L1 protein (Fig S5B).  $\alpha$ -PD-L1 treatment inhibited migration of a second EGFR mutant harboring a different EGFR mutation, whereas  $\alpha$ -PD-L1 treatment of a KRAS mutant cell line had no effect (Fig 6D & E). In line with those results, PD-L1 knockout blunted cell migration, mimicking the effect of the  $\alpha$ -PD-L1 antibody (Fig 6F & G, Fig S5C). Migration was restored when full length PD-L1 was re-expressed in PD-L1 knockout cells, but not when a mutant PD-L1, which lacks the cytoplasmic domain (CD $\Delta$ ) was expressed. This suggests a role for PD-L1's cytoplasmic domain in the regulation of migration (Fig 6F & G, Fig S5C). Neither  $\alpha$ -PD-L1 treatment nor PD-L1 knockout impacted cell viability or proliferation, demonstrating the difference in migration is not confounded by changes in cell proliferation (Fig S5D & E).

## Discussion

In this study, we show that PD-L1, beyond its function as ligand for the immune checkpoint receptor PD1, is spatially linked with key protein pathways involved in EGFR/ESCRT biology and actin-dependent motility. We demonstrate that  $\alpha$ -PD-L1 treatment, including the use of the therapeutic  $\alpha$ -PD-L1 Durvalumab antibody, has a global effect on the whole cell proteome and leads to increased biogenesis of extracellular vesicles, specifically in EGFR mutant cells. In addition,  $\alpha$ -PD-L1 treatment leads to decreased cell migration in EGFR mutant cells. Mechanistically,  $\alpha$ -PD-L1 treatment results in loss of function of PD-L1, suggesting that the clinical effects of  $\alpha$ -PD-L1 may, by affecting tumor cell-intrinsic functions of PD-L1, extend beyond the disruption of PD1 engagement.

EGFR mutant tumors are generally resistant to  $\alpha$ -PD-L1 therapy as compared to EGFR WT tumors<sup>3-5</sup>. While the mechanism behind this therapeutic disparity is not clear, there is emerging evidence suggesting that EGFR activity and PD-L1 may be functionally linked. We have shown here that surface PD-L1 levels are acutely increased by AKT signaling downstream of EGFR without affecting total protein abundance and independently of CMTM6. We found that the majority of PD-L1 at steady state is located in a dynamic intracellular storage pool, which allows cells to rapidly modulate PD-L1 expression on the plasma membrane in response to EGF. This EGFR:PD-L1 link is further supported by our finding that PD-L1 is located in close proximity to not only EGFR, but 12 other proteins known to be involved in EGFR endocytosis, signaling and protein degradation including members of the ESCRT complexes. This suggests that PD-L1 which can be regulated by EGFR may in turn directly affect EGFR protein biology. Indeed, we show that  $\alpha$ -PD-L1 treatment reduces EGFR degradation and results in an increase of EGFR protein in EGFR mutant cells. In our *in vitro* experiments we did not observe a significant difference in downstream EGFR signaling accompanying the  $\alpha$ -PD-L1 stimulated increase of total EGFR protein; however, it is possible that the 50% increase in total EGFR might result in increased tumor growth *in vivo* by providing essential signals that support survival in the nutrient-deprived tumor microenvironment.

The effect of Durvalumab or other antibody binding to PD-L1 has not been extensively studied in the context of PD-L1 reverse signaling. We find that antibody binding results in a loss of function of PD-L1 as it phenocopies the effect of PD-L1 KO on EGFR expression. Although, PD-L1 antibody binding can trigger antibody-dependent cell cytotoxicity<sup>42,43</sup>, Durvalumab lacks a functional Fc domain, and anti-transferrin receptor antibody treatment suggests the changes are not associated with cell response to antibody binding but is specific to PD-L1 function. It is possible that antibody binding causes transmembrane signaling or disrupts PD-L1 binding with partner proteins, which are responsible for signaling changes. Recent studies have identified PD-L1 signaling motifs and binding partners that result in broad transcriptional and signaling changes within the cells<sup>17,18,28</sup>.

PD-L1 protein is reported to be degraded both through proteasomal and lysosomal pathways<sup>9,12,16</sup>, and our APEX2 mapping data are consistent with PD-L1 being in proximity to the ESCRT machinery. ESCRT

proteins drive the formation of multi vesicular bodies (MVBs), which either fuse with lysosomes, resulting in degradation of contents or fuse with the plasma membrane releasing into the extracellular space the luminal vesicles as EVs<sup>38,39,44,45</sup>. The global increase in total cell protein and EV biogenesis that we observe in Durvalumab treated mutant EGFR cells suggests that PD-L1 is not merely a client of the ESCRT machinery but is involved in its regulation. Finding reduced turnover of EGFR (a client of ESCRT-dependent degradation)<sup>32</sup> and an increased biogenesis of EVs is consistent with  $\alpha$ -PD-L1 biasing MVB maturation towards EV biogenesis. This is in line with previous reports implicating PD-L1 in the ESCRT-dependent process of autophagy<sup>46</sup>. The oncogenic EGFR-specific whole cell proteome and EV changes may explain why only cells with mutant EGFR were susceptible to antibody-induced change in migration. EVs are known to have broad roles in regulating cell migration, ranging from autocrine signaling in directed migration to recruitment and infiltration of immune cells in the microenvironment<sup>47</sup>. However, at this time we cannot distinguish between a direct effect of anti-PD-L1 on cell migration or if it is secondary to changes in ESCRT function. Additionally, EGFR signaling regulates cell migration and invasion<sup>48,49</sup>, and, although we did not find differences in EGF-stimulated EGFR signaling, we cannot rule out the possibility of increased mutant EGFR protein directly impacting cell migration in oncogenic EGFR cells.

Although PD-L1 has been reported to affect cell migration in cell lines with non-EGFR driver oncogenes<sup>50</sup>, most of these studies rely on PD-L1 ablation and do not employ  $\alpha$ -PD-L1 treatment. We propose that  $\alpha$ -PD-L1 treatment does not result in a complete loss of function of PD-L1 and requires, in vitro at least, the enhanced signaling of EGFR mutant cells to display a change in phenotype. A recent study showed such a scenario where in PD-L1 induces phospholipase C- $\gamma$ 1 (PLC- $\gamma$ 1) activation only in the presence of activated EGFR<sup>18</sup>. Wildtype and mutant EGFR have been described to have largely dissimilar downstream signaling<sup>51,52</sup>, and our data with non-transformed, KRAS and EGFR mutant cells suggests that the cellular context created by oncogenic EGFR signaling may make EGFR mutant cells more susceptible to  $\alpha$ -PD-L1 antibody mediated signaling changes. Among the proteins that increased the most in EGFR mutant cells upon Durvalumab treatment, were those involved in immune regulatory processes, which closely relate to PD-L1's role as an immune checkpoint protein<sup>53</sup>. Most notably, these proteins were unchanged in non-transformed and KRAS mutant cells highlighting the distinct response of EGFR mutant cells to  $\alpha$ -PD-L1 antibody. This finding may at least partially explain why EGFR mutant tumors respond poorly to PD-L1 checkpoint blockade and suggest that PD-L1 checkpoint monotherapy should be carefully reconsidered for patients with mutant EGFR tumors.

Besides tumor cells, PD-L1 expression on immune cells has been shown to be important for regulation of migration. Specifically, PD-L1 on dendritic cells (DCs) was shown to be necessary for efficient homing of dermal DCs to the lymph nodes through modulation of chemokine receptor signaling and actin remodeling<sup>28</sup>. Our data suggests that in addition to anti-PD-L1 effect on PD-L1 blockade on DCs, shown

to be crucial for tumor control<sup>54,55</sup>, it is important to follow up on the cell intrinsic effects of anti-PD-L1 treatment on immune cell migration and proliferation.

In line with literature suggesting that PD-L1 traffics through endosomes<sup>16,56</sup>, we find that PD-L1 is localized on the plasma membrane of cells as well as in intracellular storage pools. Unlike, previous reports of PD-L1 transiting through endosomes for degradation, we find that majority of PD-L1 at steady state is located in intracellular compartments and this pool is maintained to dynamically modulate PD-L1 expression on the plasma membrane. This change is achieved within hours, and perhaps represents the fastest mode of modulating plasma membrane PD-L1, which could be crucial to limit collateral damage and promote cell survival in an immune inflamed environment.

Through APEX proximity labeling and confocal microscopy we establish the proximity of PD-L1 with MHC I, in agreement with recent results<sup>57</sup>. This organization suggest that PD-L1 is part of the immune synapse, which would contribute to its efficiency as an immune checkpoint upon engagement of MHC-I and the T cell receptor. In accordance with PD-L1 localization to specialized domains of the plasma membrane, caveolin 1 and flotillin, both of which have roles in establishing specialized membranes within a membrane<sup>58,59</sup>, are constituents of the PD-L1 proximal proteome ([Table S1](#)). Additional studies are required to determine how the clusters form and what role they have PD-L1 engagement of PD1 receptor<sup>60-62</sup>.

In conclusion, we describe a novel aspect of PD-L1 biology whereby  $\alpha$ -PD-L1 treatment results in a loss of function of cell intrinsic PD-L1 function leading to profound changes in whole cell proteome and EV secretion, upregulation of mutant EGFR protein and reduced cell migration specifically in EGFR mutant lung cancer cells. The signaling mechanism behind the changes in EGFR mutant cells with  $\alpha$ -PD-L1 treatment remain to be elucidated. Our study highlights the importance of tumor intrinsic role of PD-L1 in EGFR mutant cells and stress the need for further studies of PD-L1 antibody-based therapies beyond the immune cell regulatory context.

## Materials and Methods:

### Cell lines and culture:

A549, BEAS-2B and H23 were purchased from ATCC. H1650, HCC827, HCC4006 and PC9 were a gift from Dr. Raffaella Sordella (Cold Spring Harbor Laboratory). H1975 were a gift from Dr. Brandon Stiles (Weill Cornell Medicine). All primary human samples were obtained and used in accordance with an approved IRB protocol. Primary tumor cells were processed to obtain single cell suspensions as described previously<sup>63</sup> and plated onto glass-bottom dishes and analyzed 3-5 days later. All cells were cultured in DMEM media supplemented with 10% FBS and 1% penicillin-streptomycin at 37°C and 5% CO<sub>2</sub>. Where indicated, cells were treated with serum-free DMEM media supplemented with 0.02M HEPES and 0.03M NAHCO<sub>3</sub>. Stable cell lines were generated via lentiviral infection using Lenti-X packaging system. Cells were either antibiotic selected via blasticidin (5 µg/mL) or puromycin (3 µg/mL), or sorted for expression of protein of interest via FACS. PD-L1 KO cells were generated via CRISPR/CAS9 with both targeting sequences (guide1: 5'-CGGGAAGCTGCGCAGAACTG-3'; guide2: 5'-TCTTTATATTCATGACCTAC-3'). Live cells were stained with PD-L1 antibody and KO cells were sorted by FACS. Bulk population of KO cells was verified for PD-L1 KO via Western Blot. CMTM6 stable inducible shRNA knockdown cells were generated with one shRNA targeting sequence (5'-TTCAAAGAAGTAGAGGCCTCCA-3') and mRNA knock-down was confirmed via qRT-PCR.

### Cell treatments:

For PD-L1 PM to total measurements, cells were plated on glass bottom dishes in full growth media and assayed the next day. Cells were switched to either serum-free media, serum free media supplemented with growth factors or fresh full growth media for 4 hours. EGF was used at 8nM, IGF at 10nM and insulin at 10nM. For Akt inhibition experiments, cells were incubated in full growth media with 5 µM MK2206 or DMSO for 4 hours. Interferon gamma treatment was performed at 40 ng/mL for 24 hrs, and CMTM6 shRNA knock-down was induced by doxycycline at 1 µg/mL for 48hrs. For antibody treatment experiments, cells were treated with specified antibody or Fab for 7 hr at a final concentration of 10 µg/mL in serum free DMEM media. For protein turn-over experiments cycloheximide was used at 10 µg/mL. For stimulated EGFR degradation, cells were serum starved for 4 hr and 5 hr and treated with EGF or TGFα at 50ng/mL for indicated timepoints respectively, while antibody was used at 10 µg/mL and maintained for the duration of the experiment. For EGFR signaling experiments, cells were incubated with antibody in serum free media for 7 hr and stimulated with 0.5 ng/mL EGF for specified timepoints. For migration assays, cells were pre-incubated with Durvalumab or IgG control antibody for 5 days before being plated for experiment.

### Microscopy:

Cells were plated on glass-bottom dishes prior to all experiments. After corresponding experimental treatments, cells were washed and fixed in 3.7% formaldehyde for 5 minutes. Cells were stained with primary and fluorescent secondary antibodies for proteins of interest on the plasma membrane without permeabilization. Saponin (0.25 mg/mL) was used to permeabilize the cells for total protein stain. Cell nuclei were labeled with Hoechst stain. For quantifications, images were acquired on an inverted microscope with a 20x air objective or a 40x oil objective (Leica Biosystems DMI6000-B). Images were analyzed on MetaMorph image processing software and the background corrected average intensity under each cell's area was used to quantify protein amount. The values were normalized to the average of replicate coverslip dishes in control condition in each experiment to allow for comparison across experiments. Unpaired two tailed Student's t test or paired ratio t-test were performed on unnormalized raw data, and one sample t test was used on normalized data respectively as indicated. For comparison of three and more groups, one-way ANOVA was performed on raw data with post-hoc Tuckey test where indicated. For PD-L1 stain images, Z stack of the cells was acquired using Zeiss Confocal microscope (LSM880) with Airyscan on a 40x oil objective.

#### Exocytosis assay:

Live cells were incubated with a saturating concentration of PD-L1 antibody (50 µg/mL) for indicated times, washed extensively with PBS, and then fixed. All cells were permeabilized and stained with a secondary antibody to visualize all antibody bound to the cells. Separate set of dishes was used to quantify total PD-L1 stain in fixed cells in each experiment. Cells were imaged and quantified as described above. All values were normalized to the plateau, which is defined as the average of values at 60 and 120min in each experiment.

#### Colocalization analysis:

For co-localization analysis cells were fixed and stained for total PD-L1 and the protein of interest with primary antibody followed by Cy3 and Alexa488-labeled secondary antibodies. Cells were imaged on Zeiss Confocal microscope (LSM880) with Airyscan on a 40x oil objective. Images were analyzed in MetaMorph software. Intensity threshold was manually determined for each colocalization marker and kept constant for a binary mask of the marker. The binary mask was overlaid with PD-L1 staining resulting in PD-L1 stain only in pixels positive for the marker proteins. For each cell, integrated intensity of PD-L1 staining in the original images as well as the overlaid images were calculated. Ratio of overlaid intensity over original intensity was used as "fraction under mask". Unpaired t-test was performed on raw data.

#### Quantitative RT-PCR:

Cells were lysed after indicated treatments in each experiments and RNA was extracted using RNeasy kit, and cDNA was prepared from extracted RNA using the RNA to cDNA EcoDry Premix. Quantitative



RT-PCR was performed using appropriate primer pairs indicated in Supplementary Table 4. 2(-Delta Delta C(T)) method was used to quantify gene expression.

#### Western blotting:

Cells were lysed in laemmli buffer with protease/phosphatase inhibitors and the lysate was boiled at 95°C for 7 minutes. Lysates were run on 8% or 10% SDS gels and transferred onto nitrocellulose membranes. The membrane was blocked with 5% milk or Licor blocking buffer for 1 hr at room temperature, then incubated with primary antibody overnight at 4°C followed by secondary antibody for 1 hr at room temperature. Blots were visualized using Licor Odyssey Fc Imager for two color or ThermoFisher MyECL Imager for single color assays and analyzed on ImageStudio or ImageJ software respectively. Actin or GAPDH expression was used as loading control where indicated. One sample t-test was performed on normalized data for comparison of two groups. One-way ANOVA and post-hoc paired ratio t-test was performed on raw data for three or more groups. For degradation assays, K rate constant for the non-linear regression and slopes for linear regression were used to calculate statistical difference.

#### EGFR Immunoprecipitation:

Cells were grown to confluency and treated with anti-PD-L1 Ab (clone #130021, Novus Biologicals) for 7 hr in serum free media, followed by addition of EGF (50ng/mL) for specified times. Cells were lysed in lysis buffer (150 mM NaCl, 50 mM Tris-HCl pH 7.5, 1% Triton X-100) with protease/phosphatase inhibitors at given timepoints. Protein concentration was measured using BCA assay and lysates were incubated with anti-EGFR antibody (4 µg/mL) for 1 hr at 4°C on a rotator. Lysates were then added to pre-washed protein A/G agarose beads and rotated overnight at 4°C. Beads were washed four times with lysis buffer and boiled in 1.5x Laemmli buffer for 5 minutes at 95°C to elute the proteins. Resulting IP fraction was analyzed via Western blot along with whole cell extract.

#### Extracellular vesicle, whole cell extract mass spectrometry:

Cells were adjusted to media supplemented with 10% exosome free FBS for 1 passage and plated at 60% confluency in exosome free media. After 48 hours of Durvalumab treatment (10 µg/mL), cell media was collected for extracellular vesicle isolation and cells were lysed in 1x RIPA buffer with protease/phosphatase inhibitors. Extracellular vesicles were isolated by sequential ultracentrifugation (12000g for 10 min to discard cell debris, 20000 g for 20 min to discard microvesicles, 100000 g for 70 min twice to isolate and wash the EVs) and resuspended in a final volume of 100 µL of RIPA buffer with protease/phosphatase inhibitors. Cell extract and EV lysates were quantified for protein concentration. A final amount of 100 µg of WCE, and equi-volume of EVs approximating 10 µg of protein in each sample was submitted for mass spectrometry analysis.

The samples were digested in solution with trypsin overnight at 37°C following reduction with 5mM DTT and 14mM alkylation with iodoacetamide. The digests were vacuum centrifuged to near dryness and desalted by Sep-Pak column.

A Thermo Fisher Scientific EASY-nLC 1000 coupled on-line to a Fusion Lumos mass spectrometer (Thermo Fisher Scientific) was used. Buffer A (0.1% FA in water) and buffer B (0.1% FA in ACN) were used as mobile phases for gradient separation (1). A 75  $\mu\text{m}$  x 15 cm chromatography column (ReproSil-Pur C18-AQ, 3  $\mu\text{m}$ , Dr. Maisch GmbH, German) was packed in-house for peptides separation. Peptides were separated with a gradient of 3–28% buffer B over 110 min, 28%–80% B over 10 min at a flow rate of 300 nL/min. The Fusion Lumos mass spectrometer was operated in data dependent mode. Full MS scans were acquired in the Orbitrap mass analyzer over a range of 300–1500 m/z with resolution 120,000 at m/z 200. The top 15 most abundant precursors with charge states between 2 and 5 were selected with an isolation window of 1.4 Thomsons by the quadrupole and fragmented by higher-energy collisional dissociation with normalized collision energy of 35. MS/MS scans were acquired in the Orbitrap mass analyzer with resolution 15,000 at m/z 200. The automatic gain control target value was 1e6 for full scans and 5e4 for MS/MS scans respectively, and the maximum ion injection time is 60 ms for both.

The raw files were processed using the MaxQuant computational proteomics platform version 1.5.5.1 (Max Planck Institute, Munich, Germany) for protein identification. The fragmentation spectra were used to search the UniProt human protein database (downloaded on 01/16/2021). Oxidation of methionine and protein N-terminal acetylation were used as variable modifications for database searching. The precursor and fragment mass tolerances were set to 7 and 20 ppm, respectively. Both peptide and protein identifications were filtered at 1% false discovery rate based on decoy search using a database with the protein sequences reversed.

#### PD-L1-APEX2 labeling and mass spectrometry:

APEX2 proximity assay was performed as described previously<sup>64</sup>. Briefly, BEAS-2B cells stably expressing PD-L1 APEX2 were grown until confluency. Cells were preincubated with biotin phenol in full growth media for 30 minutes and hydrogen peroxide was added for 1 minute (except in negative control). Cells were washed three times with ice cold quenching solution (10 mM sodium ascorbate, 5 mM Trolox and 10 mM sodium azide solution in PBS) and cells were lysed in 1x RIPA lysis buffer with protease/phosphatase inhibitors. Protein concentration was measured, and biotinylated proteins were pulled down using streptavidin-agarose beads overnight at 4°C. Beads were washed (twice with RIPA lysis buffer, once with 1 M KCl, once with 0.1 M Na<sub>2</sub>CO<sub>3</sub>, once with 2 M urea in 10 mM Tris-HCl, pH 8.0, and twice with RIPA lysis buffer) and pull-down proteins were submitted for mass spectrometry.

Peptides from streptavidin purified proteins were released via on-bead digestion using trypsin (Promega) and desalted on C18 STAGE Tips [PMID: 12585499]. Eluted peptides were dried and re-suspended in 5% formic acid (FA). Mass Spectrometric analysis was performed on a Thermo Orbitrap Fusion mass spectrometer equipped with an Easy nLC-1000 UHPLC. Peptides were separated with a 115 min gradient of 5–25% acetonitrile in 0.1 % FA at 350 nl/min and introduced into the mass spectrometer by electrospray ionization as they eluted off a self-packed 40 cm, 100  $\mu$ m (ID) column packed with 1.8  $\mu$ m, 120 Å pore size, C18 resin (Sepax Technologies, Newark, DE). The column was heated to 60°C. Peptides were detected using a data-dependent method. For each 3 sec cycle, high resolution MS1 scans performed in the orbitrap and the most abundant ions per were isolated, fragmented by CID, and scanned in the ion trap. Ions selected for MS2 analysis were excluded from reanalysis for 60 sec. Ions with +1 or unassigned charge were also excluded from analysis. MS/MS spectra were matched to peptide sequences using COMET (version 2019.01 rev. 5) (PMID: 23148064) and a composite database containing the 20,415 Uniprot reviewed canonical predicted human protein sequences (<http://uniprot.org>, downloaded 5/1/2019) and its reversed complement. Search parameters allowed for two missed cleavages, a mass tolerance of 25 ppm, a static modification of 57.02146 Da (carboxyamidomethylation) on cysteine, and a dynamic modification of 15.99491 Da (oxidation) on methionine. Peptide spectral matches (PSMs) were filtered to 1% FDR using the target-decoy strategy<sup>65</sup> and then to 1% protein FDR. Label-free quantification was performed using peptide intensities from the integrated areas under each corresponding extracted-ion-chromatogram peak. Intensities for all peptides mapping to each protein were summed for each sample.

#### Mass spectrometry data analysis:

PD-L1APEX2 data were analyzed in two different ways. In one, proteins that satisfied the following criteria were identified to be in the proximity of PD-L1: proteins with peptides in the experimental sample without peptides in the negative control ( $-H_2O_2$ ) samples, or proteins in which peptides in the experimental sample were two-fold or greater than in the control sample. Data from 5 independent experiments were analyzed individually and the final PD-L1 proximity map was determined as those proteins satisfying the criteria for PD-L1 proximity in each of the five experiments, yielding 399 PD-L1 proximity proteins. This set of proteins was used for further analyses, including biological processes pathway analysis via geneontology.org (GO database released 7-2-2021)<sup>66</sup> (as shown in Fig. 3D). The data were also analyzed by performing a t-test on  $\log_{10}$  transformed spectral intensity values between labeled and negative control samples ( $-H_2O_2$ ) on the set of 1647 proteins common to all five experiments. Significant differences between the experimental and control were determined using Benjamini-Hochberg correction for multiple testing. Fold change was calculated as ratio of average spectral intensity in labeled samples over average in negative control samples (as shown in Fig S2A). The two different methods yielded essentially the same group of proteins.

For whole cell extract mass spectrometry analysis, sum intensity in each sample was confirmed to be similar across all samples in each experiment. For each protein, average ratio of +/- Durvalumab between two biological replicate experiments was calculated. Proteins with an average +/- Durvalumab ratio >1.2 (top 25<sup>th</sup> percentile of ratios across three cell lines) and coefficient of variance below 0.1 (bottom 25<sup>th</sup> percentile) in H1650 whole cells extract were analyzed for function across biological processes using geneontology.org (GO database released 7-2-2021)<sup>66</sup>. For EV mass spectrometry analysis, ratio of +/- Durvalumab between two biological replicate experiments was calculated for each protein and plotted as a frequency distribution.

#### Migration and proliferation:

For scratch assays 35K cells were plated on each side of the Ibidi 2-well scratch assay chambers. Cells were allowed to attach for 24 hrs and wound healing was assayed in complete or serum-free media for KO/rescue cells and Durvalumab treated cells respectively at specified timepoints. Cell were imaged in bright-field on Leica Microscope. 9 images of each sample were taken at each timepoint, and three distances were measured in each image using Image J. For migration assay, 30k cells were plated on the top chamber of transwell-migration plates with 8 micron pore size in serum free media. Bottom chamber was filled with DMEM with 10% FBS and cells were allowed to migrate for 24 hrs. Cells were then fixed in 3.7% formaldehyde for 15 minutes, washed and then stained in Crystal Violet for 20 minutes. Unmigrated cells were scraped off with damp cotton swab and membrane was cut out and mounted on slides. Migrated cells were imaged on upright microscope (Zeiss Axioplan) with 10x objective and analyzed via ImageJ. For proliferation assay, 5k cells were plated in triplicate 96 wells (day 0) and MTT was used to quantify viable cells on days 1-5. Paired t test was performed on raw transwell migration data, and slopes of nonlinear regression lines were used to calculate significance for scratch and MTT assays.

#### **Acknowledgements:**

We are grateful to Dr. Raffaella Sordella (Cold Spring Harbor Laboratories) for generously sharing EGFR mutant cell lines with us. We thank Astra Zeneca for the gift of Durvalumab antibody. We thank Dr. Alberto Benito and Dr. Kristy Brown for help with EV purification. We thank Rosemary Leahey for assistance with imaging studies. We thank the Optical Microscopy & Image Analysis Core at Weill Cornell Medicine for assistance with confocal microscopy. We thank Guoan Zhang and the Weill Cornell Medicine Proteomics and Metabolomics Core for assistance with whole cell and EV proteomics. We thank Dr. Jeremy Dittman, Dr. Geoffrey Markowitz, Dr. Lucie Yammine, Dr. Anuttoma Ray, Jennifer Wen, and Emma Johnson for helpful discussions and critical reading of the manuscript. The project was supported in part by NCI UG3 CA244697 (NKA, TEM), the Yoram Cohen family foundation (NKA), Vicky and Jay Furhman family fund (NKA) and a WCM Meyer Cancer Center pilot grant (NKA,TEM). TEM is also supported by DOD LC180227. EY is supported by a diversity supplement to CA244697.

**Author contributions:**

AL designed and performed the experiments, analyzed the data, and wrote the manuscript.

EY designed experiments, generated the KO cells, and wrote the manuscript.

PC and ND performed and assisted with APEX2 mass spectrometry experiments and analysis

NKA conceptualized the project, contributed to experimental design and interpretations, and edited the manuscript.

TEM conceptualized the project, contributed to experimental design, performed analysis and interpretation, and wrote the manuscript.

## References

- 1 Hamanishi, J. *et al.* PD-1/PD-L1 blockade in cancer treatment: perspectives and issues. *Int J Clin Oncol* **21**, 462-473, doi:10.1007/s10147-016-0959-z (2016).
- 2 Jiang, Y., Zhao, X., Fu, J. & Wang, H. Progress and Challenges in Precise Treatment of Tumors With PD-1/PD-L1 Blockade. *Front Immunol* **11**, 339, doi:10.3389/fimmu.2020.00339 (2020).
- 3 Gainor, J. F. *et al.* EGFR Mutations and ALK Rearrangements Are Associated with Low Response Rates to PD-1 Pathway Blockade in Non-Small Cell Lung Cancer: A Retrospective Analysis. *Clin Cancer Res* **22**, 4585-4593, doi:10.1158/1078-0432.CCR-15-3101 (2016).
- 4 Lee, C. K. *et al.* Checkpoint Inhibitors in Metastatic EGFR-Mutated Non-Small Cell Lung Cancer-A Meta-Analysis. *J Thorac Oncol* **12**, 403-407, doi:10.1016/j.jtho.2016.10.007 (2017).
- 5 Mazieres, J. *et al.* Immune checkpoint inhibitors for patients with advanced lung cancer and oncogenic driver alterations: results from the IMMUNOTARGET registry. *Ann Oncol*, doi:10.1093/annonc/mdz167 (2019).
- 6 Pardoll, D. M. The blockade of immune checkpoints in cancer immunotherapy. *Nat Rev Cancer* **12**, 252-264, doi:10.1038/nrc3239 (2012).
- 7 Fang, W. *et al.* EBV-driven LMP1 and IFN-gamma up-regulate PD-L1 in nasopharyngeal carcinoma: Implications for oncotargeted therapy. *Oncotarget* **5**, 12189-12202, doi:10.18632/oncotarget.2608 (2014).
- 8 Gowrishankar, K. *et al.* Inducible but not constitutive expression of PD-L1 in human melanoma cells is dependent on activation of NF-kappaB. *PLoS One* **10**, e0123410, doi:10.1371/journal.pone.0123410 (2015).
- 9 Shen, X. *et al.* Recent Findings in the Regulation of Programmed Death Ligand 1 Expression. *Front Immunol* **10**, 1337, doi:10.3389/fimmu.2019.01337 (2019).
- 10 Hsu, J. M. *et al.* STT3-dependent PD-L1 accumulation on cancer stem cells promotes immune evasion. *Nat Commun* **9**, 1908, doi:10.1038/s41467-018-04313-6 (2018).
- 11 Huang, X. *et al.* USP22 Deubiquitinates CD274 to Suppress Anticancer Immunity. *Cancer Immunol Res* **7**, 1580-1590, doi:10.1158/2326-6066.CIR-18-0910 (2019).
- 12 Li, C. W. *et al.* Glycosylation and stabilization of programmed death ligand-1 suppresses T-cell activity. *Nat Commun* **7**, 12632, doi:10.1038/ncomms12632 (2016).
- 13 Yang, Y. *et al.* Palmitoylation stabilizes PD-L1 to promote breast tumor growth. *Cell Res* **29**, 83-86, doi:10.1038/s41422-018-0124-5 (2019).
- 14 Burr, M. L. *et al.* CMTM6 maintains the expression of PD-L1 and regulates anti-tumour immunity. *Nature*, doi:10.1038/nature23643 (2017).
- 15 Mezzadra, R. *et al.* Identification of CMTM6 and CMTM4 as PD-L1 protein regulators. *Nature*, doi:10.1038/nature23669 (2017).
- 16 Wang, H. *et al.* HIP1R targets PD-L1 to lysosomal degradation to alter T cell-mediated cytotoxicity. *Nat Chem Biol* **15**, 42-50, doi:10.1038/s41589-018-0161-x (2019).
- 17 Gato-Canas, M. *et al.* PDL1 Signals through Conserved Sequence Motifs to Overcome Interferon-Mediated Cytotoxicity. *Cell Rep* **20**, 1818-1829, doi:10.1016/j.celrep.2017.07.075 (2017).
- 18 Ghosh, S. *et al.* PD-L1 recruits phospholipase C and enhances tumorigenicity of lung tumors harboring mutant forms of EGFR. *Cell Rep* **35**, 109181, doi:10.1016/j.celrep.2021.109181 (2021).
- 19 Chen, L. *et al.* PD-L1 Expression Promotes Epithelial to Mesenchymal Transition in Human Esophageal Cancer. *Cell Physiol Biochem* **42**, 2267-2280, doi:10.1159/000480000 (2017).
- 20 Wang, Y. *et al.* PD-L1 induces epithelial-to-mesenchymal transition via activating SREBP-1c in renal cell carcinoma. *Med Oncol* **32**, 212, doi:10.1007/s12032-015-0655-2 (2015).
- 21 Zhang, P. *et al.* The up-regulation of PD-L1 promotes the resistant response in non-small cell lung cancer patients with neo-adjuvant chemotherapy. *Cancer Sci*, doi:10.1111/cas.13072 (2016).
- 22 Sholl, L. M. *et al.* Multi-institutional Oncogenic Driver Mutation Analysis in Lung Adenocarcinoma: The Lung Cancer Mutation Consortium Experience. *J Thorac Oncol* **10**, 768-777, doi:10.1097/JTO.0000000000000516 (2015).

- 23 Ibrahim, R., Stewart, R. & Shalabi, A. PD-L1 blockade for cancer treatment: MEDI4736. *Semin Oncol* **42**, 474-483, doi:10.1053/j.seminoncol.2015.02.007 (2015).
- 24 Stewart, R. *et al.* Identification and Characterization of MEDI4736, an Antagonistic Anti-PD-L1 Monoclonal Antibody. *Cancer Immunol Res* **3**, 1052-1062, doi:10.1158/2326-6066.CIR-14-0191 (2015).
- 25 Blot, V. & McGraw, T. E. Use of quantitative immunofluorescence microscopy to study intracellular trafficking: studies of the GLUT4 glucose transporter. *Methods Mol Biol* **457**, 347-366 (2008).
- 26 Gonzalez, E. & McGraw, T. E. The Akt kinases: isoform specificity in metabolism and cancer. *Cell Cycle* **8**, 2502-2508, doi:10.4161/cc.8.16.9335 (2009).
- 27 Chen, B. S. & Roche, K. W. Growth factor-dependent trafficking of cerebellar NMDA receptors via protein kinase B/Akt phosphorylation of NR2C. *Neuron* **62**, 471-478, doi:10.1016/j.neuron.2009.04.015 (2009).
- 28 Lucas, E. D. *et al.* PD-L1 Reverse Signaling in Dermal Dendritic Cells Promotes Dendritic Cell Migration Required for Skin Immunity. *Cell Rep* **33**, 108258, doi:10.1016/j.celrep.2020.108258 (2020).
- 29 Lobingier, B. T. *et al.* An Approach to Spatiotemporally Resolve Protein Interaction Networks in Living Cells. *Cell* **169**, 350-360 e312, doi:10.1016/j.cell.2017.03.022 (2017).
- 30 Lam, S. S. *et al.* Directed evolution of APEX2 for electron microscopy and proximity labeling. *Nat Methods* **12**, 51-54, doi:10.1038/nmeth.3179 (2015).
- 31 Chung, B. M. *et al.* Aberrant trafficking of NSCLC-associated EGFR mutants through the endocytic recycling pathway promotes interaction with Src. *BMC Cell Biol* **10**, 84, doi:10.1186/1471-2121-10-84 (2009).
- 32 Katzmann, D. J., Babst, M. & Emr, S. D. Ubiquitin-dependent sorting into the multivesicular body pathway requires the function of a conserved endosomal protein sorting complex, ESCRT-I. *Cell* **106**, 145-155, doi:10.1016/s0092-8674(01)00434-2 (2001).
- 33 Sigismund, S. *et al.* Clathrin-mediated internalization is essential for sustained EGFR signaling but dispensable for degradation. *Dev Cell* **15**, 209-219, doi:10.1016/j.devcel.2008.06.012 (2008).
- 34 Huang, F., Kirkpatrick, D., Jiang, X., Gygi, S. & Sorkin, A. Differential regulation of EGF receptor internalization and degradation by multiubiquitination within the kinase domain. *Mol Cell* **21**, 737-748, doi:10.1016/j.molcel.2006.02.018 (2006).
- 35 Hosaka, T. *et al.* Mutant epidermal growth factor receptor undergoes less protein degradation due to diminished binding to c-Cbl. *Anticancer Res* **27**, 2253-2263 (2007).
- 36 Huang, F., Goh, L. K. & Sorkin, A. EGF receptor ubiquitination is not necessary for its internalization. *Proc Natl Acad Sci U S A* **104**, 16904-16909, doi:10.1073/pnas.0707416104 (2007).
- 37 Shtiegman, K. *et al.* Defective ubiquitinylation of EGFR mutants of lung cancer confers prolonged signaling. *Oncogene* **26**, 6968-6978, doi:10.1038/sj.onc.1210503 (2007).
- 38 Raiborg, C. & Stenmark, H. The ESCRT machinery in endosomal sorting of ubiquitylated membrane proteins. *Nature* **458**, 445-452, doi:10.1038/nature07961 (2009).
- 39 McAndrews, K. M. & Kalluri, R. Mechanisms associated with biogenesis of exosomes in cancer. *Mol Cancer* **18**, 52, doi:10.1186/s12943-019-0963-9 (2019).
- 40 Eitan, E., Suire, C., Zhang, S. & Mattson, M. P. Impact of lysosome status on extracellular vesicle content and release. *Ageing Res Rev* **32**, 65-74, doi:10.1016/j.arr.2016.05.001 (2016).
- 41 Latifkar, A. *et al.* Loss of Sirtuin 1 Alters the Secretome of Breast Cancer Cells by Impairing Lysosomal Integrity. *Dev Cell* **49**, 393-408 e397, doi:10.1016/j.devcel.2019.03.011 (2019).
- 42 Saleh, R., Taha, R. Z., Sasidharan Nair, V., Alajez, N. M. & Elkord, E. PD-L1 Blockade by Atezolizumab Downregulates Signaling Pathways Associated with Tumor Growth, Metastasis, and Hypoxia in Human Triple Negative Breast Cancer. *Cancers (Basel)* **11**, doi:10.3390/cancers11081050 (2019).
- 43 Chew, H. Y. *et al.* Endocytosis Inhibition in Humans to Improve Responses to ADCC-Mediating Antibodies. *Cell* **180**, 895-914 e827, doi:10.1016/j.cell.2020.02.019 (2020).
- 44 Henne, W. M., Buchkovich, N. J. & Emr, S. D. The ESCRT pathway. *Dev Cell* **21**, 77-91, doi:10.1016/j.devcel.2011.05.015 (2011).
- 45 Juan, T. & Furthauer, M. Biogenesis and function of ESCRT-dependent extracellular vesicles. *Semin Cell Dev Biol* **74**, 66-77, doi:10.1016/j.semcdb.2017.08.022 (2018).
- 46 Clark, C. A. *et al.* Tumor-Intrinsic PD-L1 Signals Regulate Cell Growth, Pathogenesis, and Autophagy in Ovarian Cancer and Melanoma. *Cancer Res* **76**, 6964-6974, doi:10.1158/0008-5472.CAN-16-0258 (2016).

- 47 Sung, B. H., Parent, C. A. & Weaver, A. M. Extracellular vesicles: Critical players during cell migration. *Dev Cell*, doi:10.1016/j.devcel.2021.03.020 (2021).
- 48 Mittal, S., Kamath, A., Joseph, A. M. & Rajala, M. S. PLCgamma1dependent invasion and migration of cells expressing NSCLCassociated EGFR mutants. *Int J Oncol* **57**, 989-1000, doi:10.3892/ijo.2020.5112 (2020).
- 49 Holsken, A. *et al.* EGFR signaling regulates tumor cell migration in craniopharyngiomas. *Clin Cancer Res* **17**, 4367-4377, doi:10.1158/1078-0432.CCR-10-2811 (2011).
- 50 Yu, W. *et al.* PD-L1 promotes tumor growth and progression by activating WIP and beta-catenin signaling pathways and predicts poor prognosis in lung cancer. *Cell Death Dis* **11**, 506, doi:10.1038/s41419-020-2701-z (2020).
- 51 Guo, A. *et al.* Signaling networks assembled by oncogenic EGFR and c-Met. *Proc Natl Acad Sci U S A* **105**, 692-697, doi:10.1073/pnas.0707270105 (2008).
- 52 Pines, G., Kostler, W. J. & Yarden, Y. Oncogenic mutant forms of EGFR: lessons in signal transduction and targets for cancer therapy. *FEBS Lett* **584**, 2699-2706, doi:10.1016/j.febslet.2010.04.019 (2010).
- 53 Chen, L. & Han, X. Anti-PD-1/PD-L1 therapy of human cancer: past, present, and future. *J Clin Invest* **125**, 3384-3391, doi:10.1172/JCI80011 (2015).
- 54 Oh, S. A. *et al.* PD-L1 expression by dendritic cells is a key regulator of T-cell immunity in cancer. *Nature Cancer* **1**, 681-691, doi:10.1038/s43018-020-0075-x (2020).
- 55 Peng, Q. *et al.* PD-L1 on dendritic cells attenuates T cell activation and regulates response to immune checkpoint blockade. *Nat Commun* **11**, 4835, doi:10.1038/s41467-020-18570-x (2020).
- 56 Yao, H. *et al.* Inhibiting PD-L1 palmitoylation enhances T-cell immune responses against tumours. *Nat Biomed Eng* **3**, 306-317, doi:10.1038/s41551-019-0375-6 (2019).
- 57 Geri, J. B. *et al.* Microenvironment mapping via Dexter energy transfer on immune cells. *Science* **367**, 1091-1097, doi:10.1126/science.aay4106 (2020).
- 58 Head, B. P., Patel, H. H. & Insel, P. A. Interaction of membrane/lipid rafts with the cytoskeleton: impact on signaling and function: membrane/lipid rafts, mediators of cytoskeletal arrangement and cell signaling. *Biochim Biophys Acta* **1838**, 532-545, doi:10.1016/j.bbamem.2013.07.018 (2014).
- 59 Staubach, S. & Hanisch, F. G. Lipid rafts: signaling and sorting platforms of cells and their roles in cancer. *Expert Rev Proteomics* **8**, 263-277, doi:10.1586/epr.11.2 (2011).
- 60 Yokosuka, T. *et al.* Programmed cell death 1 forms negative costimulatory microclusters that directly inhibit T cell receptor signaling by recruiting phosphatase SHP2. *J Exp Med* **209**, 1201-1217, doi:10.1084/jem.20112741 (2012).
- 61 Arasanz, H. *et al.* PD1 signal transduction pathways in T cells. *Oncotarget* **8**, 51936-51945, doi:10.18632/oncotarget.17232 (2017).
- 62 Fooksman, D. R., Gronvall, G. K., Tang, Q. & Edidin, M. Clustering class I MHC modulates sensitivity of T cell recognition. *J Immunol* **176**, 6673-6680 (2006).
- 63 Chaudhri, V. K. *et al.* Metabolic alterations in lung cancer-associated fibroblasts correlated with increased glycolytic metabolism of the tumor. *Mol Cancer Res* **11**, 579-592, doi:10.1158/1541-7786.MCR-12-0437-T (2013).
- 64 Hung, V. *et al.* Spatially resolved proteomic mapping in living cells with the engineered peroxidase APEX2. *Nat Protoc* **11**, 456-475, doi:10.1038/nprot.2016.018 (2016).
- 65 Elias, J. E. & Gygi, S. P. Target-decoy search strategy for increased confidence in large-scale protein identifications by mass spectrometry. *Nat Methods* **4**, 207-214, doi:10.1038/nmeth1019 (2007).
- 66 Ashburner, M. *et al.* Gene ontology: tool for the unification of biology. The Gene Ontology Consortium. *Nat Genet* **25**, 25-29, doi:10.1038/75556 (2000).



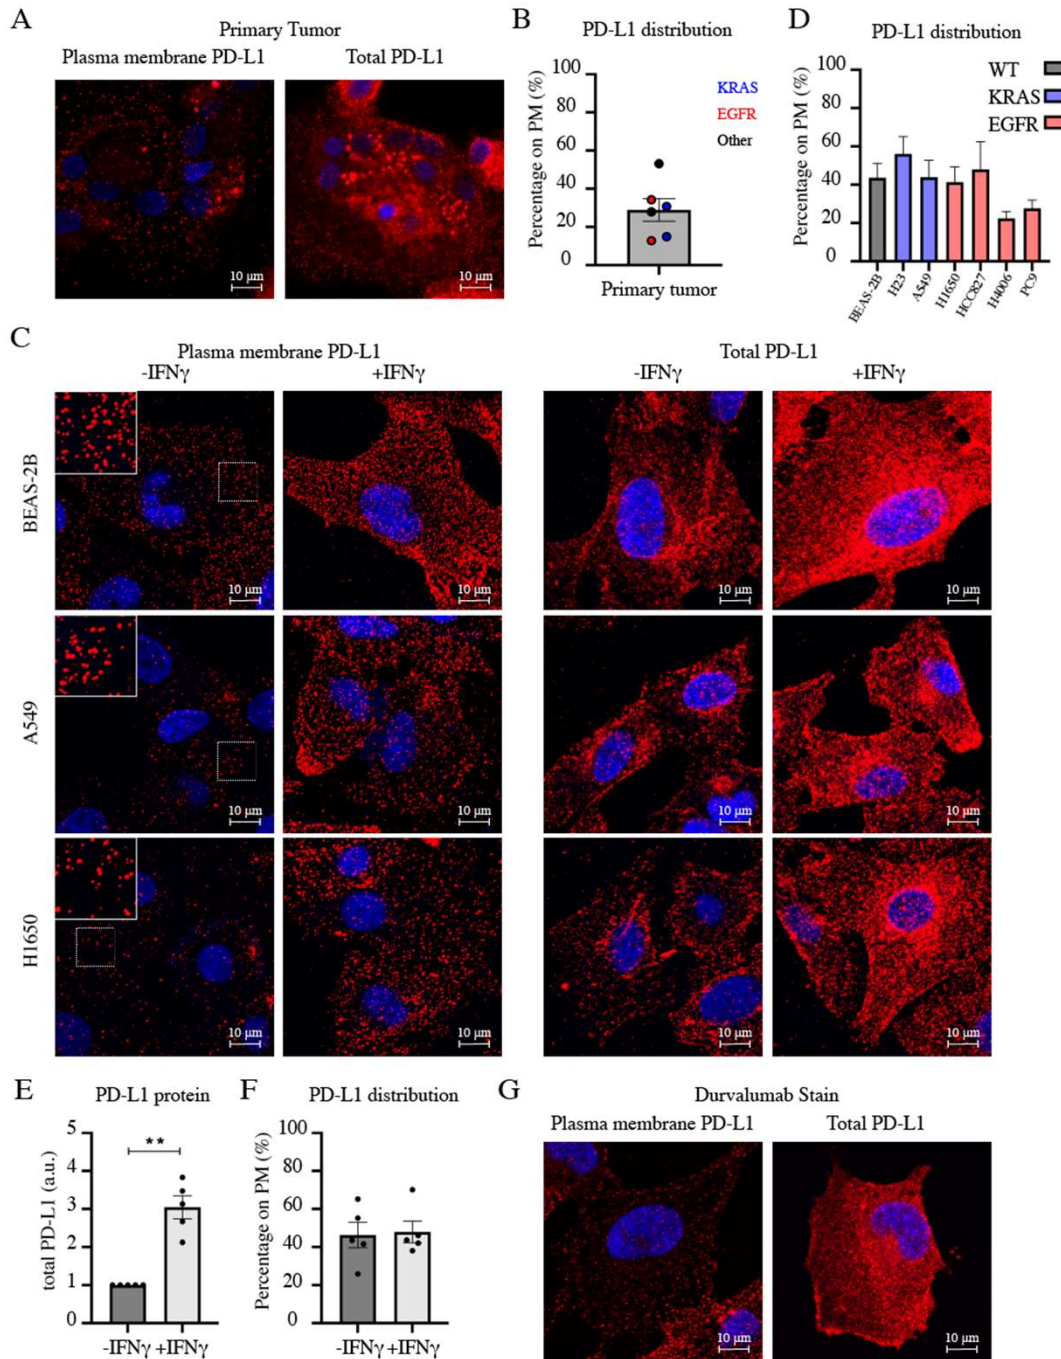

**Figure 1. PD-L1 is localized to the plasma membrane and intracellular compartments.**

- A. Representative confocal images of primary human tumor cells immunostained for plasma membrane (PM) and total PD-L1. Red: PD-L1. Blue: Hoechst
- B. Quantification of percentage of PM PD-L1 in primary human tumors. Each data point is a patient sample color coded for known oncogenes.
- C. Representative confocal images of human lung cell lines with or without IFN $\gamma$  treatment (40ng/mL, 24 hr) and immunostained for PM and total PD-L1. Red: PD-L1. Blue: Hoechst. Sum intensity of z-stacks is projected. Fluorescence intensity is equally scaled across panels for each cell line. Insets in -IFN $\gamma$  PM are enhanced for better visualization.
- D. Quantification of percentage of PM PD-L1 in human lung cell lines.
- E. Total PD-L1 protein level in BEAS-2B cells treated with IFN $\gamma$  (40ng/mL, 24 hr). Each data point is an experiment. One sample t-test.
- F. Quantification of PM localization of PD-L1 in BEAS-2B cells treated with IFN $\gamma$  (40ng/mL, 24 hr). Each data point is an experiment. Unpaired student's t-test.
- G. Representative confocal images BEAS-2B cells stained for PM and total PD-L1 using clinical Durvalumab antibody. Red: PD-L1. Blue: Hoechst

All quantifications are calculated from average immunofluorescence staining intensity on epifluorescence images. All error bars = SEM. \*  $\leq 0.05$ , \*\*  $\leq 0.01$ , \*\*\*  $\leq 0.001$

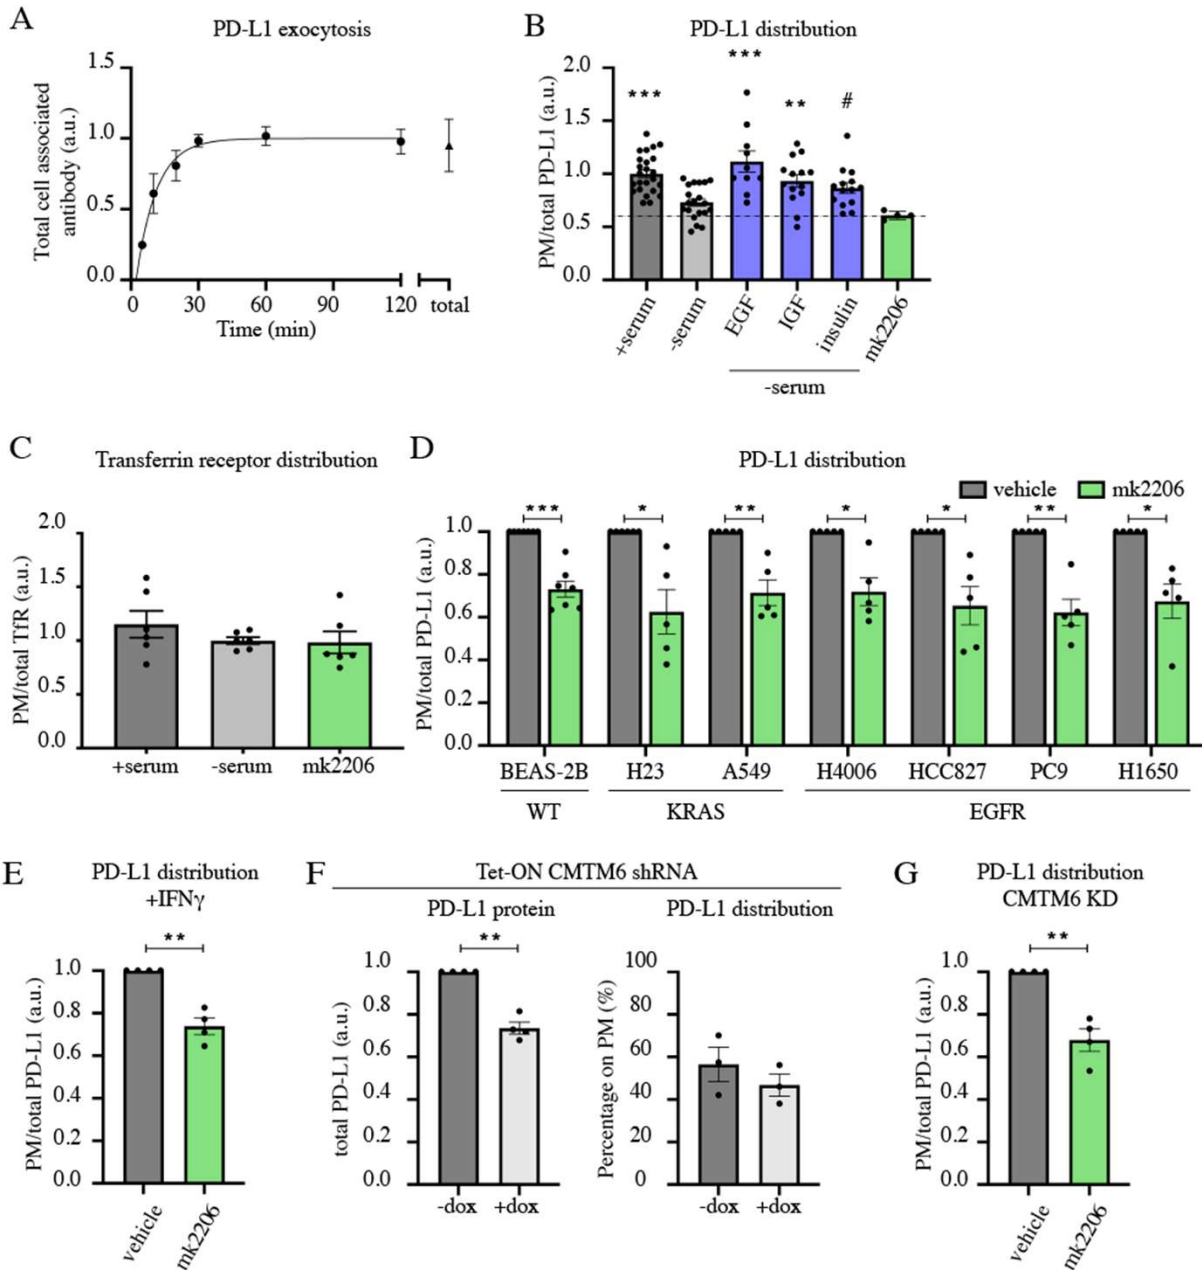

**Figure 2. PD-L1 plasma membrane localization is controlled by growth factor and Akt signaling.**

- A. PD-L1 steady state exocytosis in BEAS-2B cells. The line is a fit of the data to one-phase association exponential equation. Total PD-L1 stain normalized to exocytosis plateau is shown on the right. N=3
- B. PD-L1 PM to total ratio with growth factors treatment or Akt inhibition in BEAS-2B cells. Cells were subjected to 4 hr of corresponding treatment prior to fixation and immunostain. Growth factors were added to serum-free media (EGF 8nM, IGF 10nM, insulin 10nM), MK2206 was added to serum complete media (MK2206 5 $\mu$ M). One-way ANOVA and post-hoc Tukey test.
- C. Transferrin receptor (TfR) PM to total ratio in BEAS-2B cells. Cells were treated for 4 hrs. MK2206 was added to serum complete media (MK2206 5 $\mu$ M). One-way ANOVA.
- D. PD-L1 PM to total ratio in cell lines treated with vehicle (DMSO) or Akt inhibitor for 4 hrs (MK2206 5 $\mu$ M). One sample t-test.
- E. PD-L1 PM to total ratio in IFN $\gamma$  (40 ng/mL, 24 hr) treated BEAS-2B cells incubated with vehicle (DMSO) or Akt inhibitor (MK2206 5 $\mu$ M) for 4 hrs. One sample t-test.
- F. PD-L1 protein expression and distribution in BEAS-2B expressing doxycycline inducible CMTM6 shRNA (doxycycline 48 hr, 1  $\mu$ g/mL; all cells in IFN $\gamma$  24 hr, 40 ng/mL). Left: Total PD-L1 protein. Right: PM localization of PD-L1. One sample and unpaired t-tests.
- G. PD-L1 PM to total ratio in CMTM6 knocked-down (KD) BEAS-2B cells (doxycycline 48 hr, 1  $\mu$ g/mL; all cells in IFN $\gamma$  24 hr, 40 ng/mL) treated with vehicle (DMSO) or Akt inhibitor (MK2206 5 $\mu$ M) for 4 hrs. One sample t-test.

All quantifications are calculated from average immunofluorescence staining intensity on epifluorescence images. Except panel A, each data point is an experiment. All error bars = SEM. \*  $\leq 0.05$ , \*\*  $\leq 0.01$ , \*\*\*  $\leq 0.001$ , # = 0.058

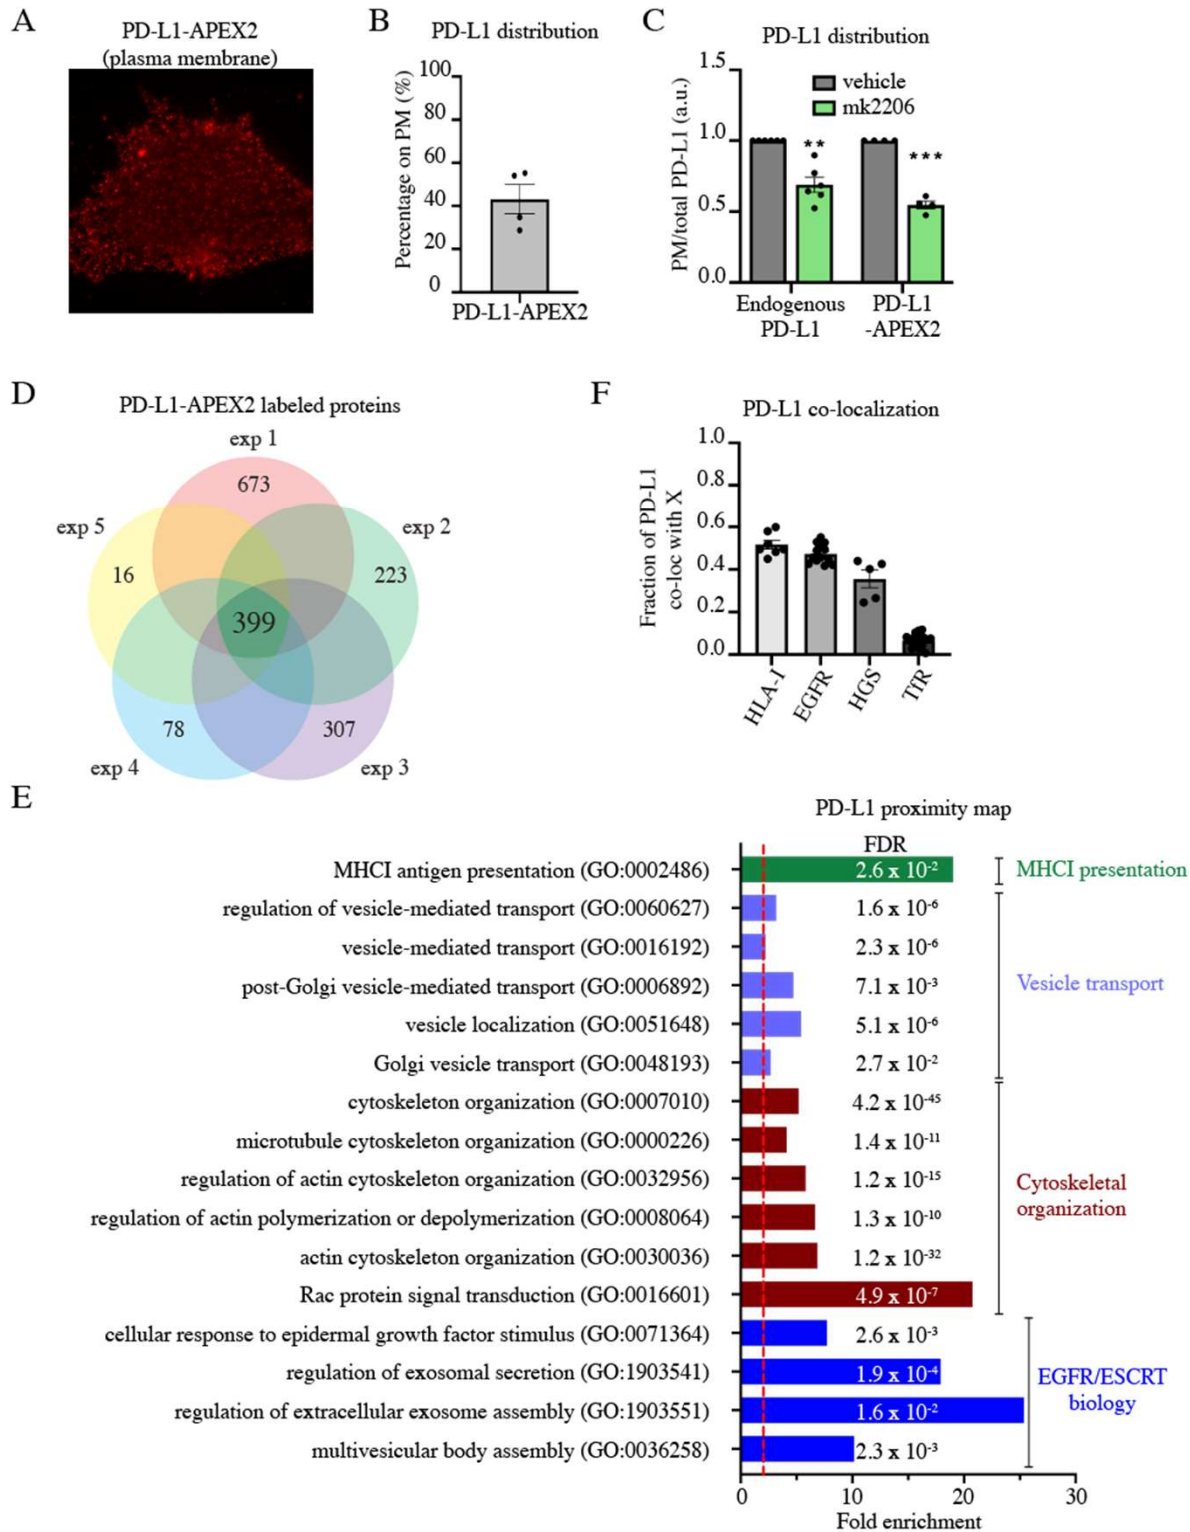

**Figure 3. PD-L1 proximal proteome**

- A. Representative epifluorescence image of PD-L1-APEX2 plasma membrane stain in BEAS-2B cells.
- B. PM to total distribution of PD-L1-APEX2 in BEAS-2B cells. Each data point is an experiment.
- C. PM to total ratio of endogenous PD-L1 and PD-L1-APEX2 construct in BEAS-2B cells treated with vehicle (DMSO) or Akt inhibitor (MK2206 5  $\mu$ M) for 4 hrs. One-sample t-test. Each data point is an experiment.
- D. Venn diagram of PD-L1-APEX2 proximal proteins identified in 5 biological replicate experiments.
- E. Biological processes pathways enriched in PD-L1-APEX2 labeling in BEAS-2B. Enrichment fold change and FDR are shown for each pathway. N=5
- F. PD-L1 co-localization with specified proteins quantified by fraction of PD-L1 intensity co-localized with each target protein. Each point is a collected from single plane images of individual cells under confocal microscopy.

All error bars = SEM. \*  $\leq 0.05$ , \*\*  $\leq 0.01$ , \*\*\*  $\leq 0.001$

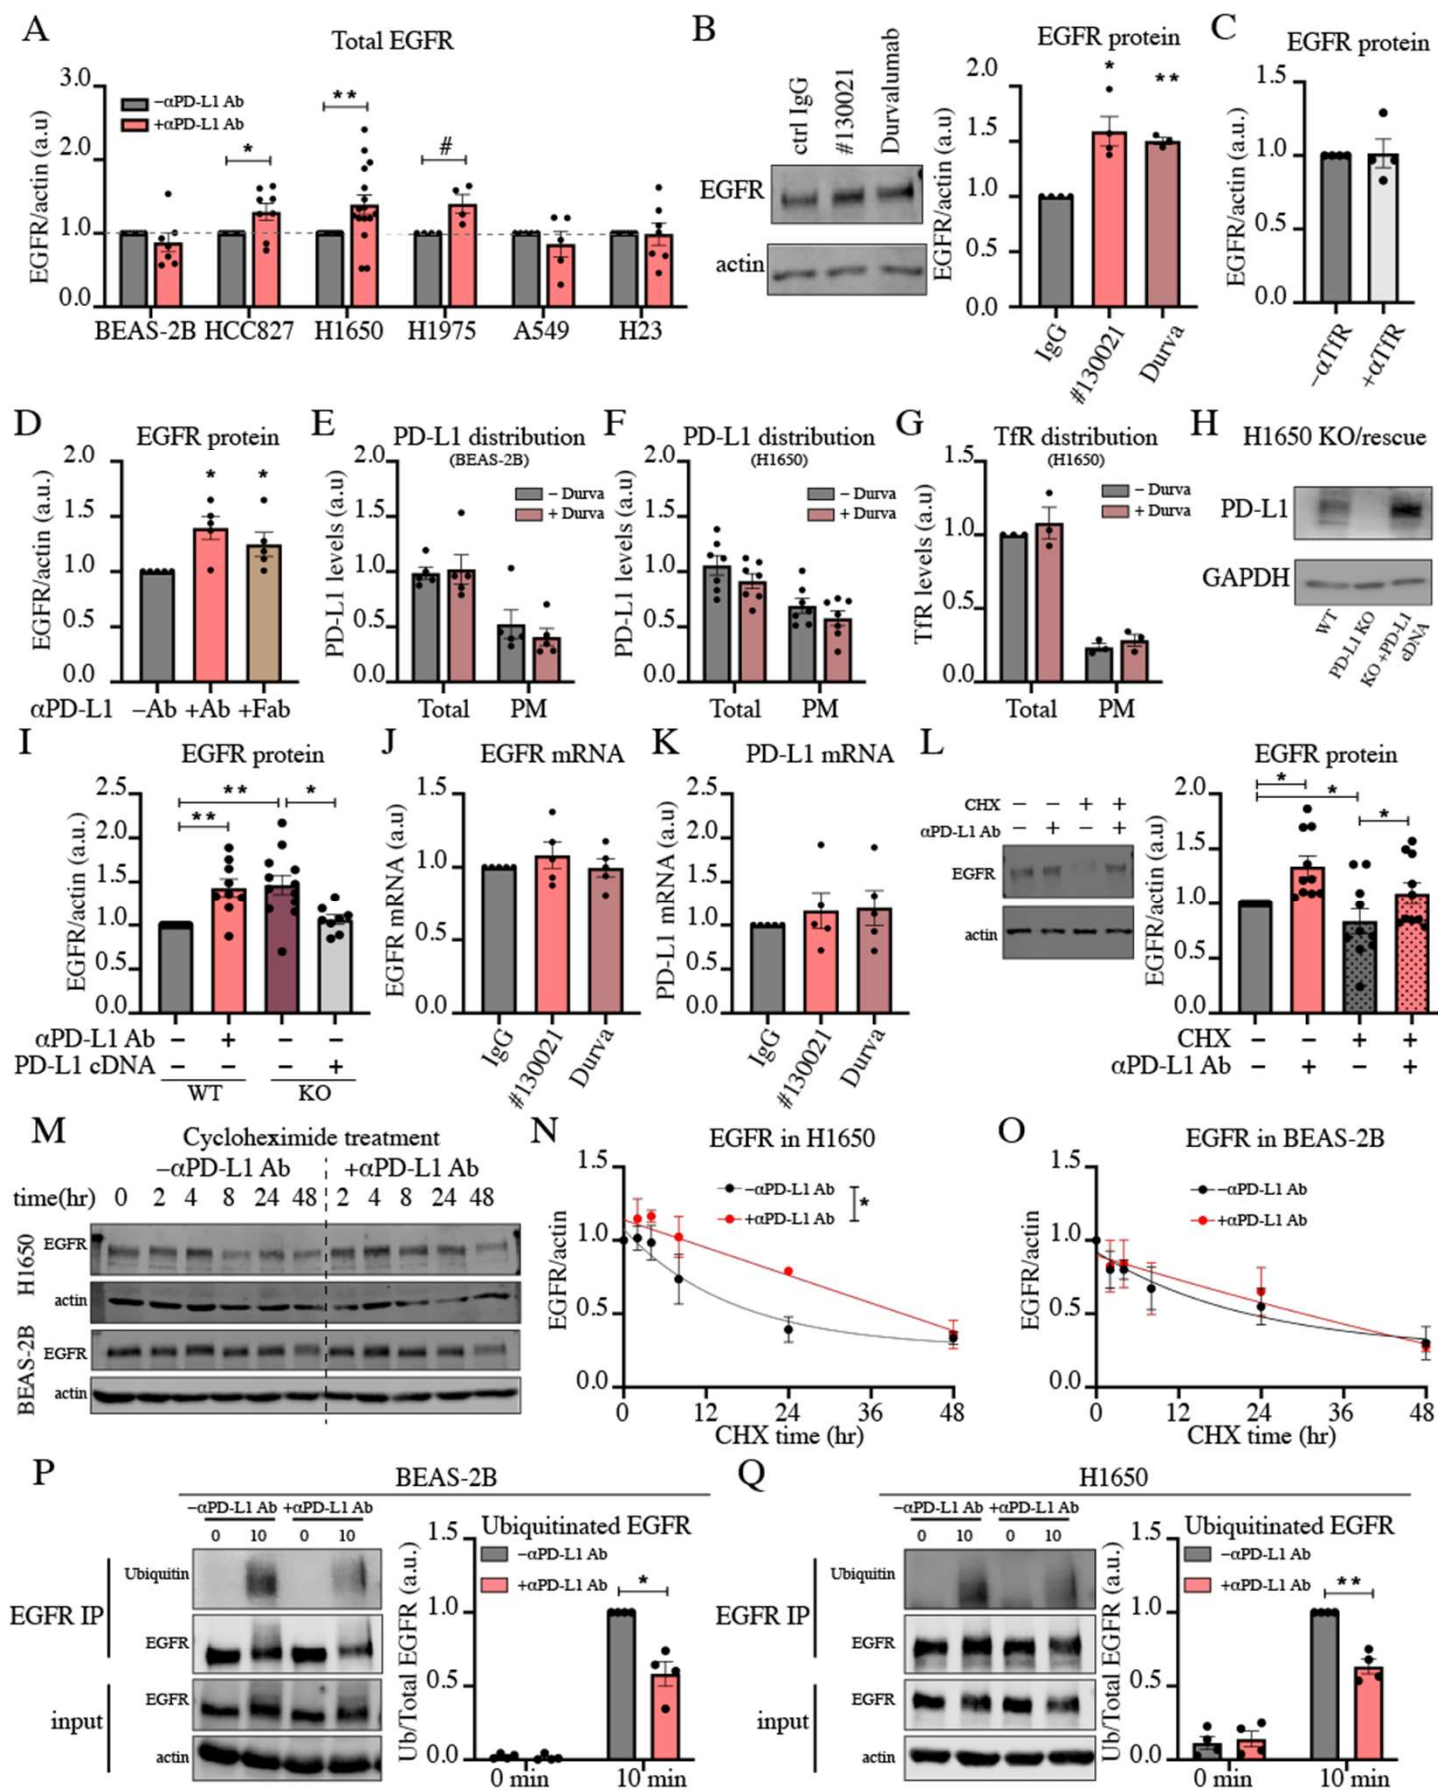

**Figure 4. αPD-L1 antibody increases mutant but not wildtype EGFR protein**

Legends on next page

**Figure 4.  $\alpha$ PD-L1 antibody increases mutant but not wildtype EGFR protein**

- A. EGFR protein expression in cell lines treated with  $\alpha$ PD-L1 antibody (10 $\mu$ g/mL, 7 hr). Western blot quantifications of EGFR protein normalized to actin expression are shown. One sample t-test.
- B. Immunoblot of EGFR protein expression in H1650 cells treated with reagent grade  $\alpha$ PD-L1 antibody (clone # 130021, Novus Biologicals) and clinical Durvalumab as compared to isotype IgG control antibody (all antibodies at 10 $\mu$ g/mL, 7 hr). Western blot quantifications of EGFR protein normalized to actin expression are shown. One-way ANOVA and post-hoc Tukey test.
- C. EGFR protein in H1650 cells with  $\alpha$ TfR antibody treatment (10 $\mu$ g/mL, 7 hr). One sample t-test.
- D. EGFR protein in H1650 cells with  $\alpha$ PD-L1 antibody and  $\alpha$ PD-L1 Fab treatment (10 $\mu$ g/mL). One way ANOVA and post-hoc Tukey test.
- E. PD-L1 protein levels and distribution in BEAS-2B cells treated with Durvalumab (10 $\mu$ g/mL, 7 hr). Unpaired multiple t-tests.
- F. PD-L1 protein levels and distribution in H1650 cells treated with Durvalumab (10 $\mu$ g/mL, 7 hr). Unpaired multiple t-tests.
- G. TfR protein levels and distribution in H1650 cells treated with Durvalumab (10 $\mu$ g/mL, 7 hr). Unpaired multiple t-tests.
- H. Immunoblot of PD-L1 protein expression in WT, PD-L1 KO and PD-L1-reexpressing H1650 cells. Cells were pretreated with IFN $\gamma$  (40ng/mL, 24 hr)
- I. EGFR protein in WT, PD-L1 KO and PD-L1-reexpressing H1650 cells. One way ANOVA and post-hoc Tukey test.
- J. EGFR mRNA in H1650 cells treated with  $\alpha$ PD-L1 antibodies (10 $\mu$ g/mL, 7 hr). One sample t-test.
- K. PD-L1 mRNA in H1650 cells treated with  $\alpha$ PD-L1 antibodies (10 $\mu$ g/mL, 7 hr). One sample t-test.
- L. Immunoblot of EGFR protein expression in H1650 cells treated with  $\alpha$ PD-L1 antibody (10 $\mu$ g/mL, 7 hr) and cycloheximide (10 $\mu$ g/mL, 7 hr). Western blot quantifications of EGFR protein normalized to actin expression are shown. One-way ANOVA and post-hoc Tukey test.
- M. Immunoblots of EGFR degradation in H1650 and BEAS-2B cells treated with cycloheximide (10  $\mu$ g/mL) in serum complete media. Actin is used as loading control.
- N. Quantification of EGFR degradation in H1650 cells. N=3 Tested for change in rate constants.
- O. Quantification of EGFR degradation in H1650 cells. N=3 Tested for change in rate constants.
- P. Ubiquitinated EGFR protein in BEAS-2B cells treated with  $\alpha$ PD-L1 (10 $\mu$ g/mL, 7 hr) followed by EGF for specified time (50 ng/mL). Immunoblots of whole cell extract and EGFR IP fraction are shown. Ubiquitinated/total EGFR in IP fraction was quantified. Paired ratio t-test.
- Q. Ubiquitinated EGFR protein in H1650 cells treated with antibody (10 $\mu$ g/mL, 7 hr) followed by EGF for specified time (50 ng/mL). Immunoblots of whole cell extract and EGFR IP fraction are shown. Ubiquitinated/total EGFR in IP fraction was quantified. Paired ratio t-test.

Except panel N & O, each data point is an experiment. All error bars = SEM. \*  $\leq$  0.05, \*\*  $\leq$  0.01, \*\*\*  $\leq$  0.001, # = 0.051

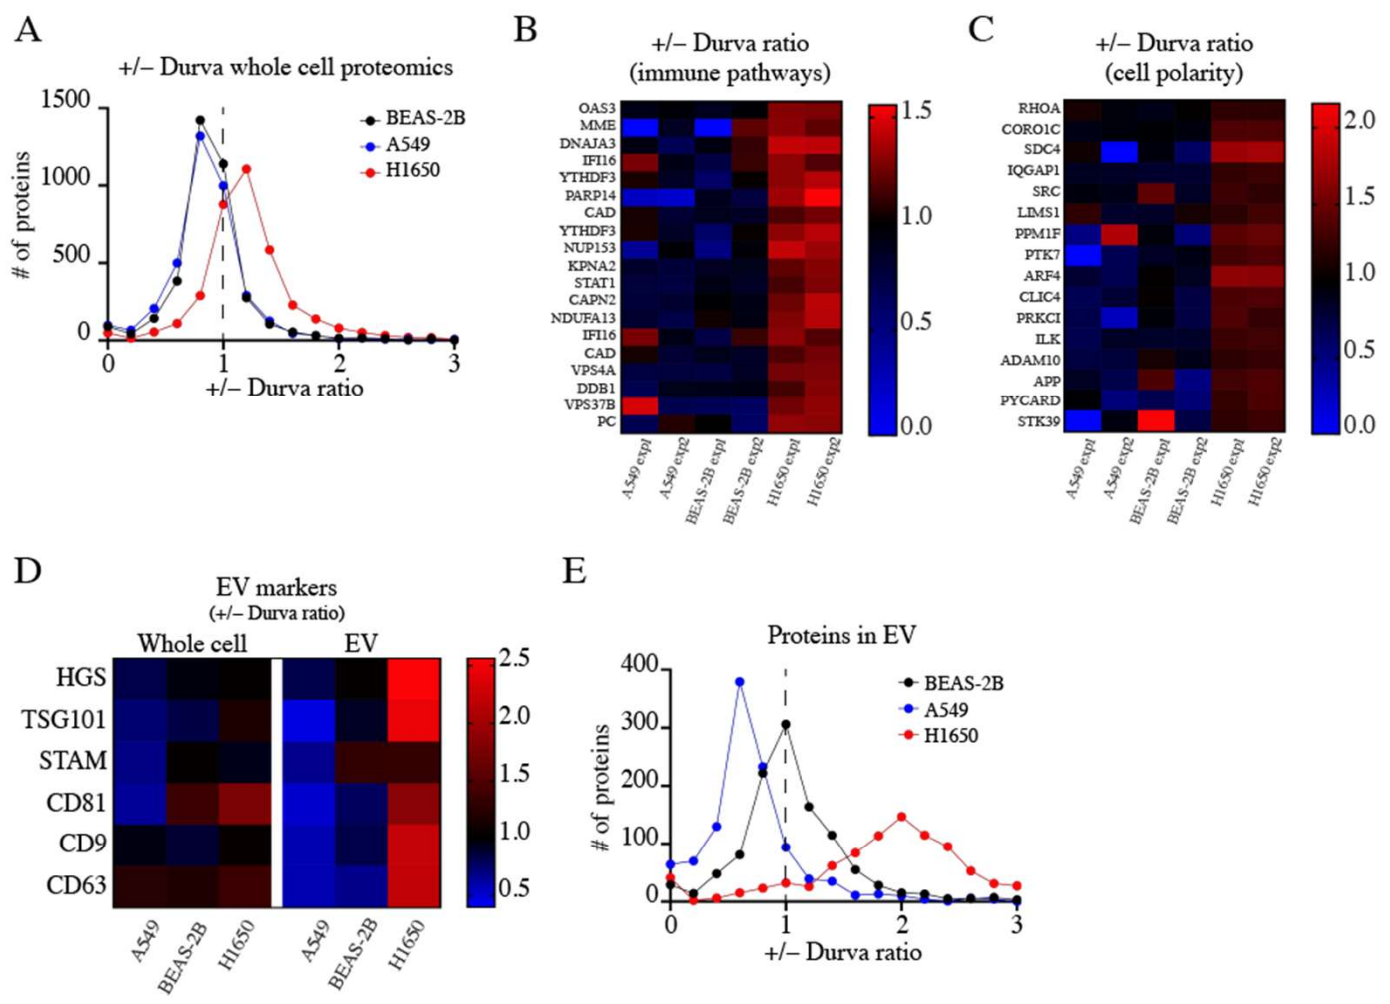

**Figure 5. Durvalumab affects whole cell proteomics and EV secretion in EGFR mutant cells**

- Ratio of mass spectrometry intensity of proteins in extracts from cells treated with Durvalumab (10 $\mu$ g/mL, 48 hr) to those from untreated cells. Frequency distribution of  $\pm$  Durvalumab ratios of whole cell proteins identified is plotted. Average value for N=2 is shown.
- Heatmap of proteins enriched in H1650 cells with Durvalumab treatment that were identified in immune related processes.  $\pm$  Durvalumab ratio for each of the two experiments is shown.
- Heatmap of proteins enriched in H1650 cells with Durvalumab treatment that were identified in cell polarity related processes.  $\pm$  Durvalumab ratio for each of the two experiments is shown.
- Heatmap of extracellular vesicle marker proteins expression in whole cell and EV fraction across cell lines treated with Durvalumab (10 $\mu$ g/mL, 48 hr). Average  $\pm$  Durvalumab value for N=2 is shown.
- Ratio of mass spectrometry intensity of proteins identified in extracellular vesicles from cells treated with Durvalumab (10 $\mu$ g/mL, 48 hr) to those from untreated cells. Frequency distribution of  $\pm$  Durvalumab ratios of extracellular vesicle proteins is plotted. Average value for N=2 is shown.

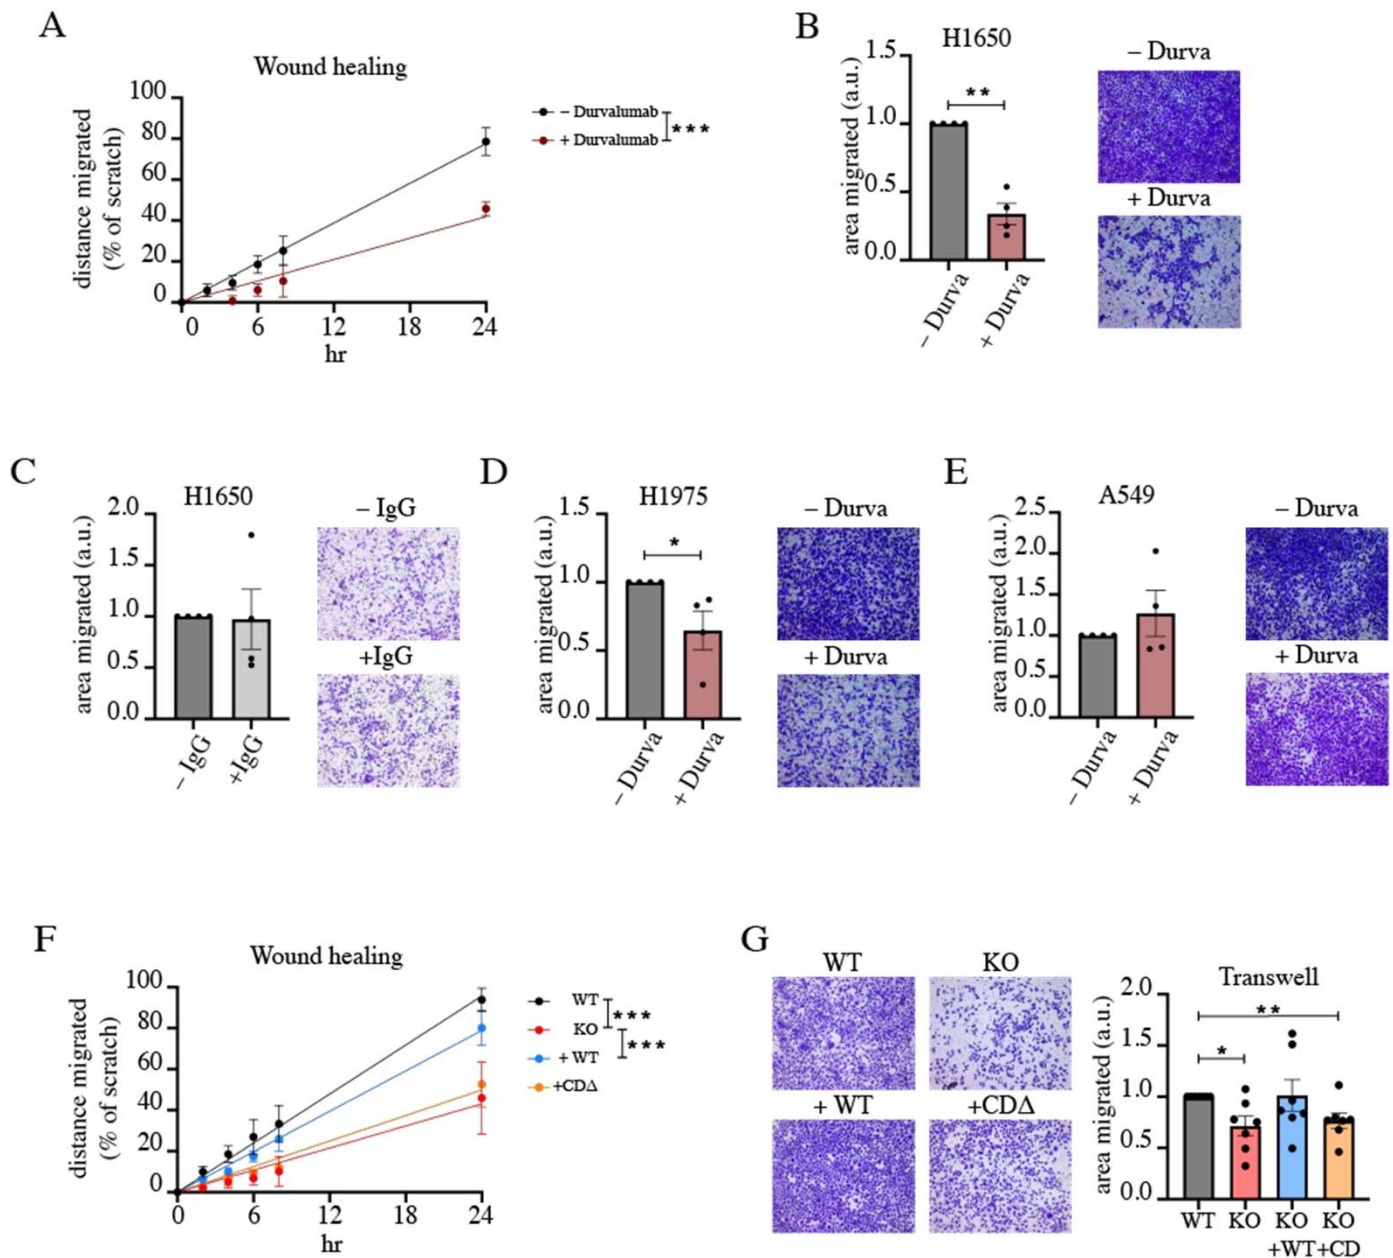

**Figure 6. PD-L1 affects cell migration in EGFR mutant cells**

- Quantification of scratch assay in H1650 cells treated with Durvalumab (10 $\mu$ g/mL). Cells were in serum-free media for the duration of the assay. N=3 Difference in slope values is calculated.
- Transwell migration of H1650 cells treated with Durvalumab (10 $\mu$ g/mL). Paired t-test
- Transwell migration of H1650 cells treated with control IgG (10 $\mu$ g/mL). Paired t-test
- Transwell migration of H1975 cells treated with Durvalumab (10 $\mu$ g/mL). Paired t-test.
- Transwell migration of A549 cells treated with Durvalumab (10 $\mu$ g/mL). Paired t-test
- Quantification of scratch assay in H1650 KO/rescue cells. Cells were in serum complete media for the duration of the assay. N=3-4 Difference in slope values is calculated.
- Transwell migration in H1650 KO/rescue cells. One-way ANOVA and post-hoc Tuckey test.

For all experiments with antibody treatments, cells were pretreated with specified antibody (10 $\mu$ g/mL) for 5 days prior to the start of experiment. Except panels A & F, each data point is an experiment. All error bars = SEM. \*  $\leq 0.05$ , \*\*  $\leq 0.01$ , \*\*\*  $\leq 0.001$

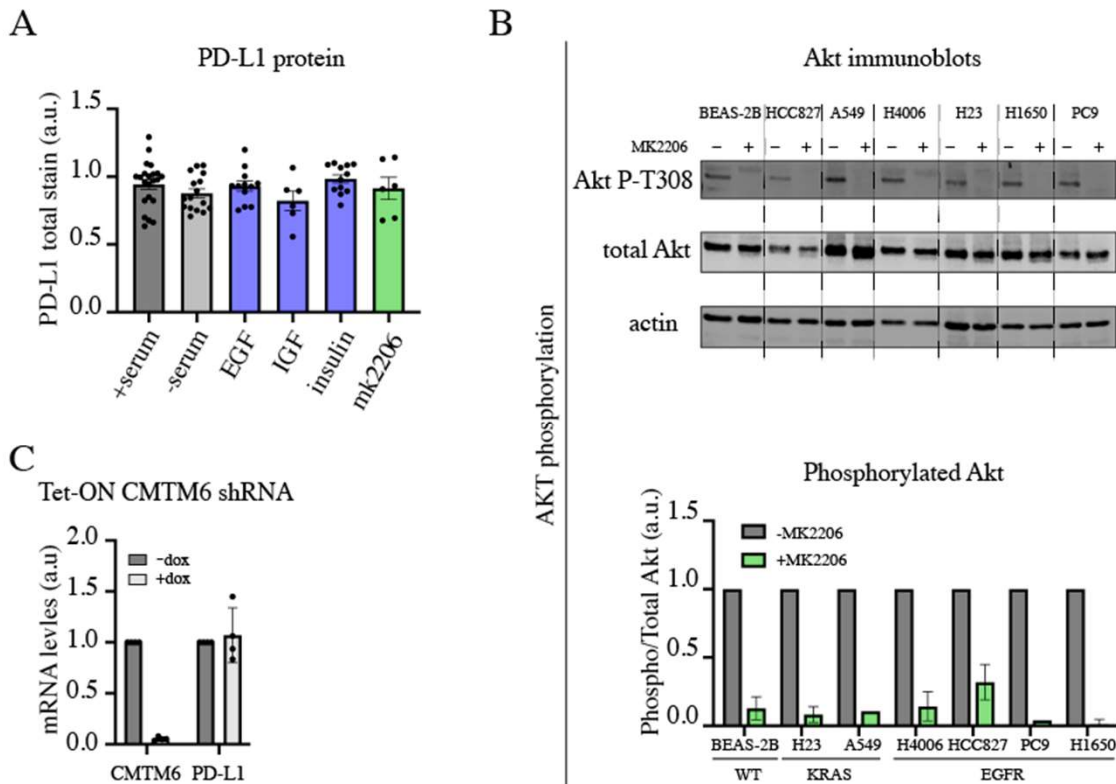

**Figure Supplemental 1. PD-L1 plasma membrane localization is controlled by growth factor and Akt signaling.**

- A. Total PD-L1 protein expression in BEAS-2B cells. Cells were subjected to 4 hr of corresponding treatment prior to fixation and immunostain. Growth factors were added to serum-free media (EGF 8nM, IGF 10nM, insulin 10nM), MK2206 was added to serum complete media (MK2206 5 $\mu$ M). One-way ANOVA.
- B. Immunoblots showing Akt T308 phosphorylation in cells treated with vehicle (DMSO) or Akt inhibitor (MK2206 5  $\mu$ M) for 4 hrs. Corresponding quantification of phospho-T308/total Akt is shown in the graph.
- C. CMTM6 and PD-L1 mRNA expression in doxycycline inducible CMTM6 shRNA BEAS-2B cells. (48 hr doxycycline, 1  $\mu$ g/mL)

Each data point is an experiment All error bars = SEM. \*  $\leq$  0.05, \*\*  $\leq$  0.01, \*\*\*  $\leq$  0.001



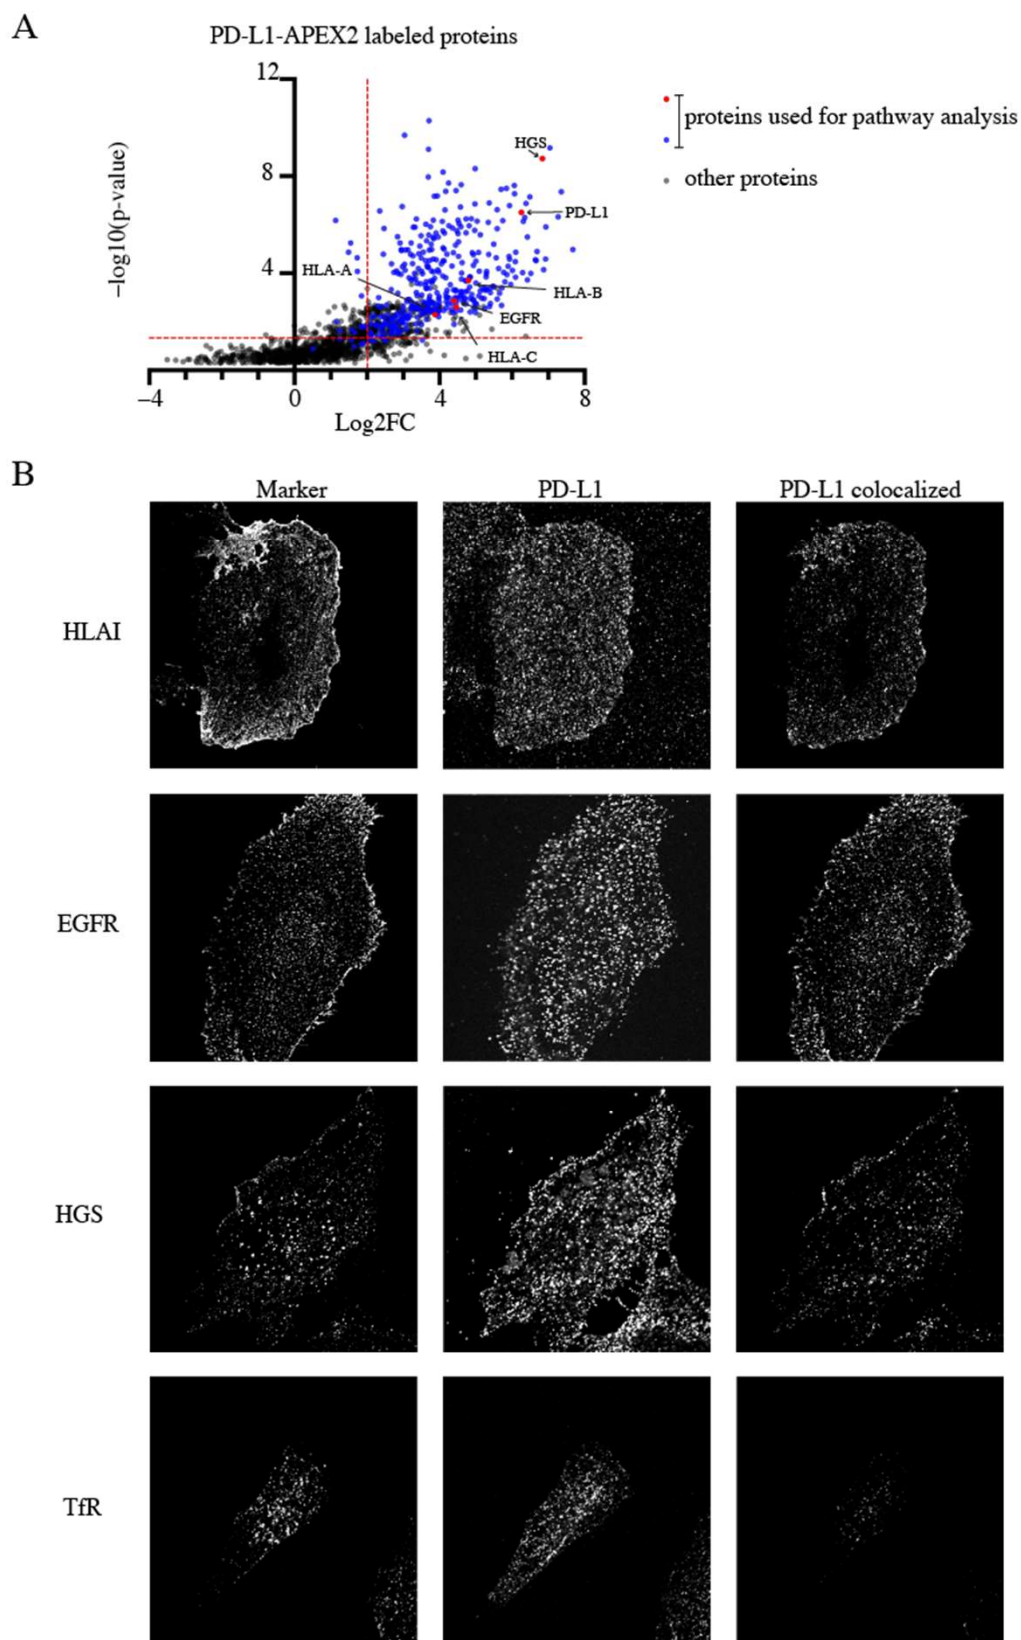

**Figure Supplemental 2. PD-L1 proximal proteome**

- A. Volcano plot of PD-L1-APEX2 labeled proteins. FC = fold change of (labeled/-ctrl) spectral intensity. Dashed red lines represent 4-fold change on the x-axis, and p-value corresponding to FDR=0.1 after Benjamini-Hochberg correction on the y-axis respectively.
- B. Representative confocal images of PD-L1 colocalization with marked proteins. PD-L1 staining intensity co-localized with marker protein staining was calculated and shown in rightmost panel. Ratio of PD-L1 intensity in colocalized image over original PD-L1 staining was used for quantifications.

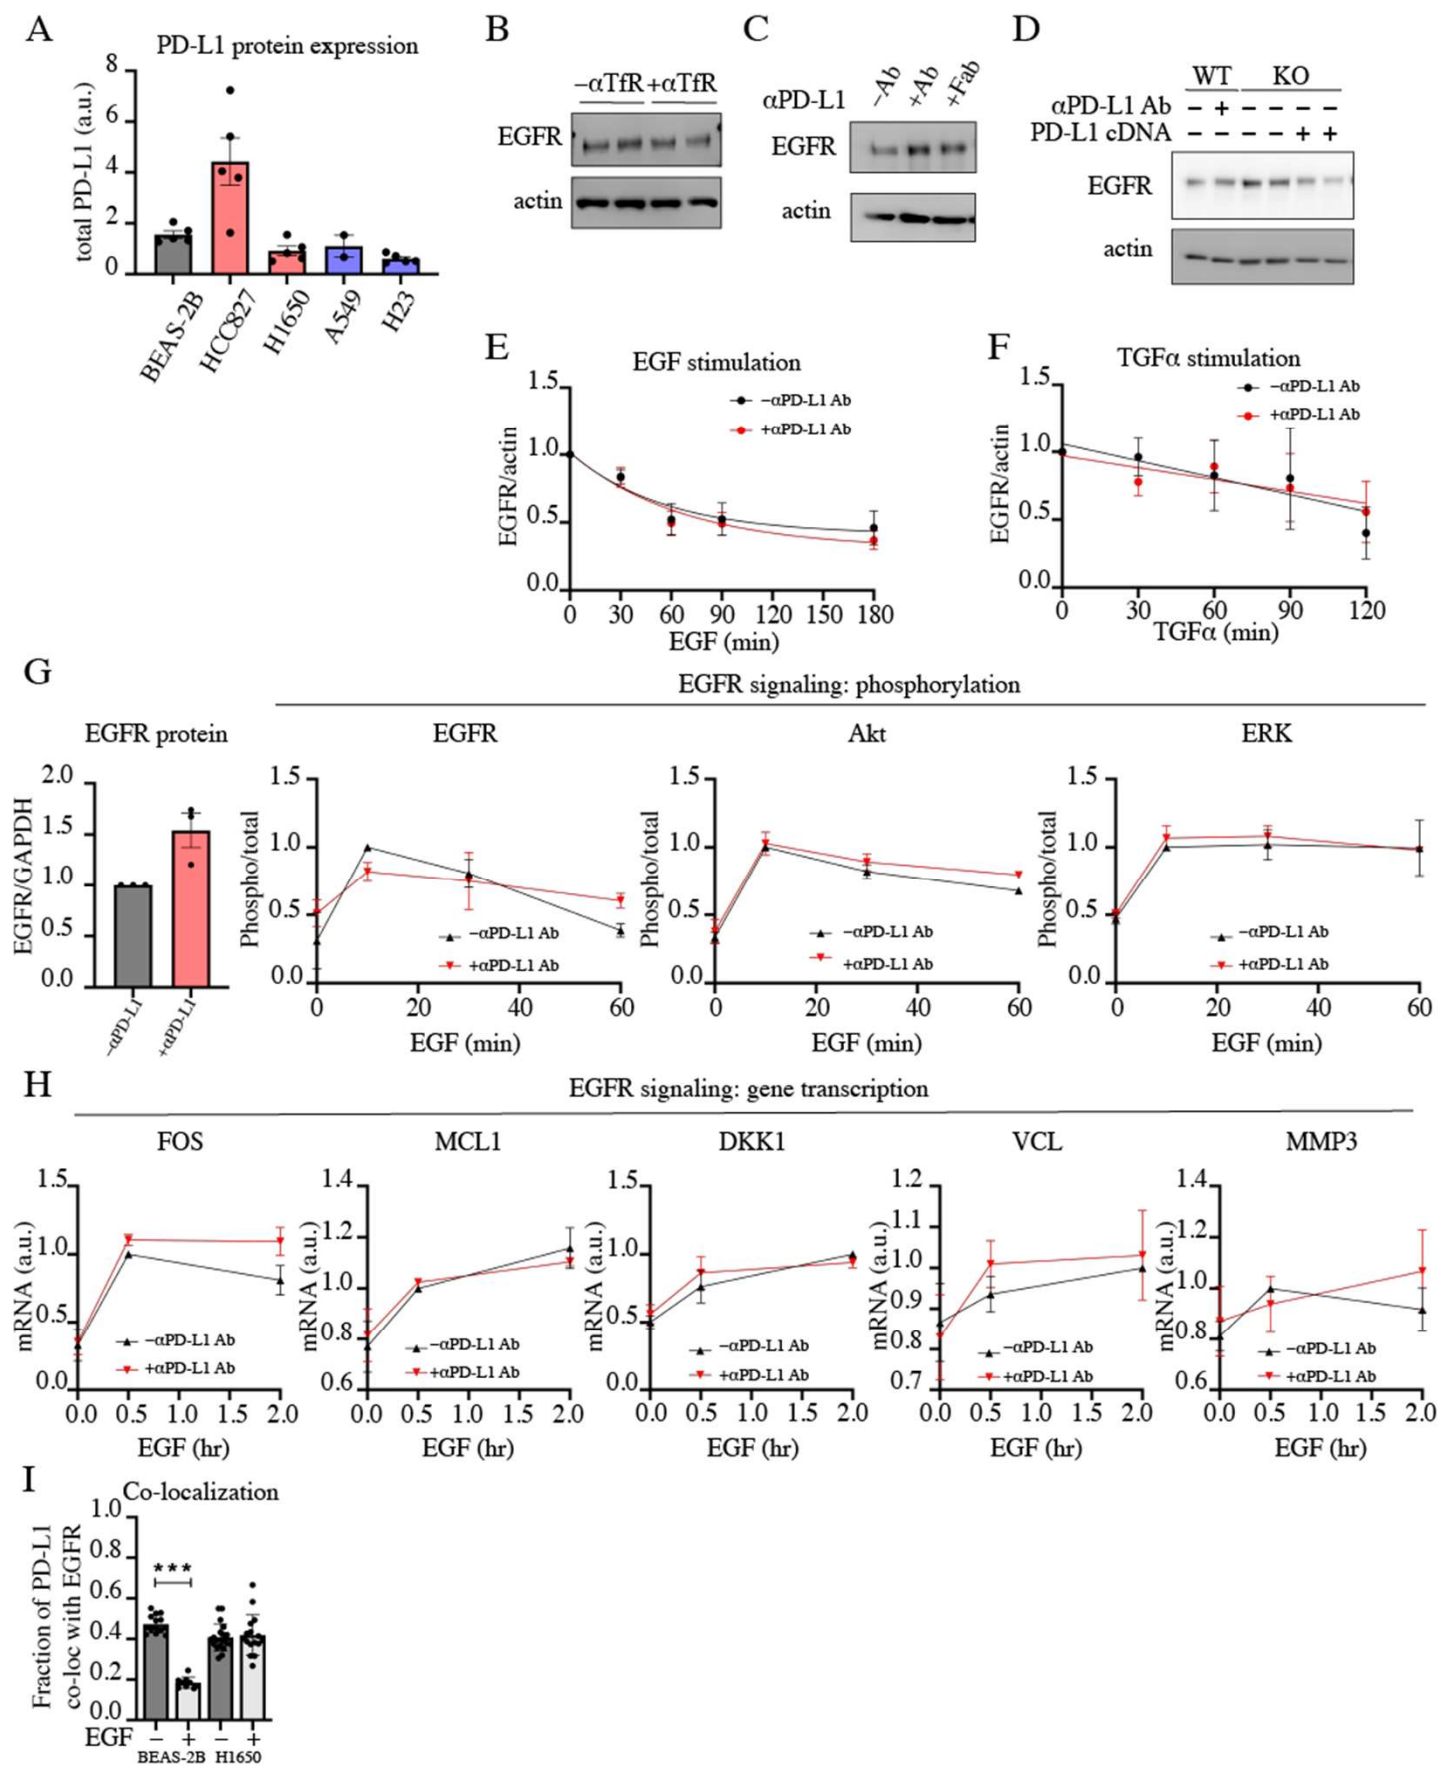

**Figure Supplemental 3. αPD-L1 antibody increases mutant but not wildtype EGFR protein**

Legends on next page

### Figure Supplemental 3. $\alpha$ PD-L1 antibody increases mutant but not wildtype EGFR protein

- A. PD-L1 total protein expression in cell lines. Quantification of immunofluorescence staining is shown. Each data point is an experiment.
- B. Representative immunoblot of EGFR and actin in H1650 cells treated with  $\alpha$ TfR antibody
- C. Representative immunoblot of EGFR and actin in WT, PD-L1 KO and PD-L1-reexpressing H1650 cells.
- D. Representative immunoblot of EGFR and actin in H1650 cells treated with  $\alpha$ PD-L1 antibody and  $\alpha$ PD-L1 Fab.
- E. EGF (50ng/mL) stimulated EGFR degradation in BEAS-2B cells treated with  $\alpha$ PD-L1 antibody (10 $\mu$ g/mL, 7 hr). N=4. Tested for change in rate constants.
- F. TGF $\alpha$  (50ng/mL) stimulated EGFR degradation in BEAS-2B cells treated with  $\alpha$ PD-L1 antibody (10 $\mu$ g/mL, 7 hr). N=3. Tested for change in slope values.
- G. EGF (0.5 ng/mL) stimulated EGFR, Akt and ERK phosphorylation in H1650 cells treated with  $\alpha$ PD-L1 antibody (10 $\mu$ g/mL, 7 hr). Immunoblot quantification of EGFR protein (left) and phospho/total EGFR, Akt and ERK is shown respectively (right three panels). N=3
- H. EGF (0.5 ng/mL) stimulated gene transcription in H1650 cells treated with  $\alpha$ PD-L1 antibody (10 $\mu$ g/mL, 7 hr). qRT-PCR mRNA quantification of EGFR target genes is shown. N=3
- I. PD-L1 colocalization with EGFR quantified by fraction of PD-L1 intensity co-localizing with EGFR via confocal microscopy. Each point is collected from single plane images of individual cells under confocal microscopy. Unpaired t-test.

All error bars = SEM. \*  $\leq$  0.05, \*\*  $\leq$  0.01, \*\*\*  $\leq$  0.001

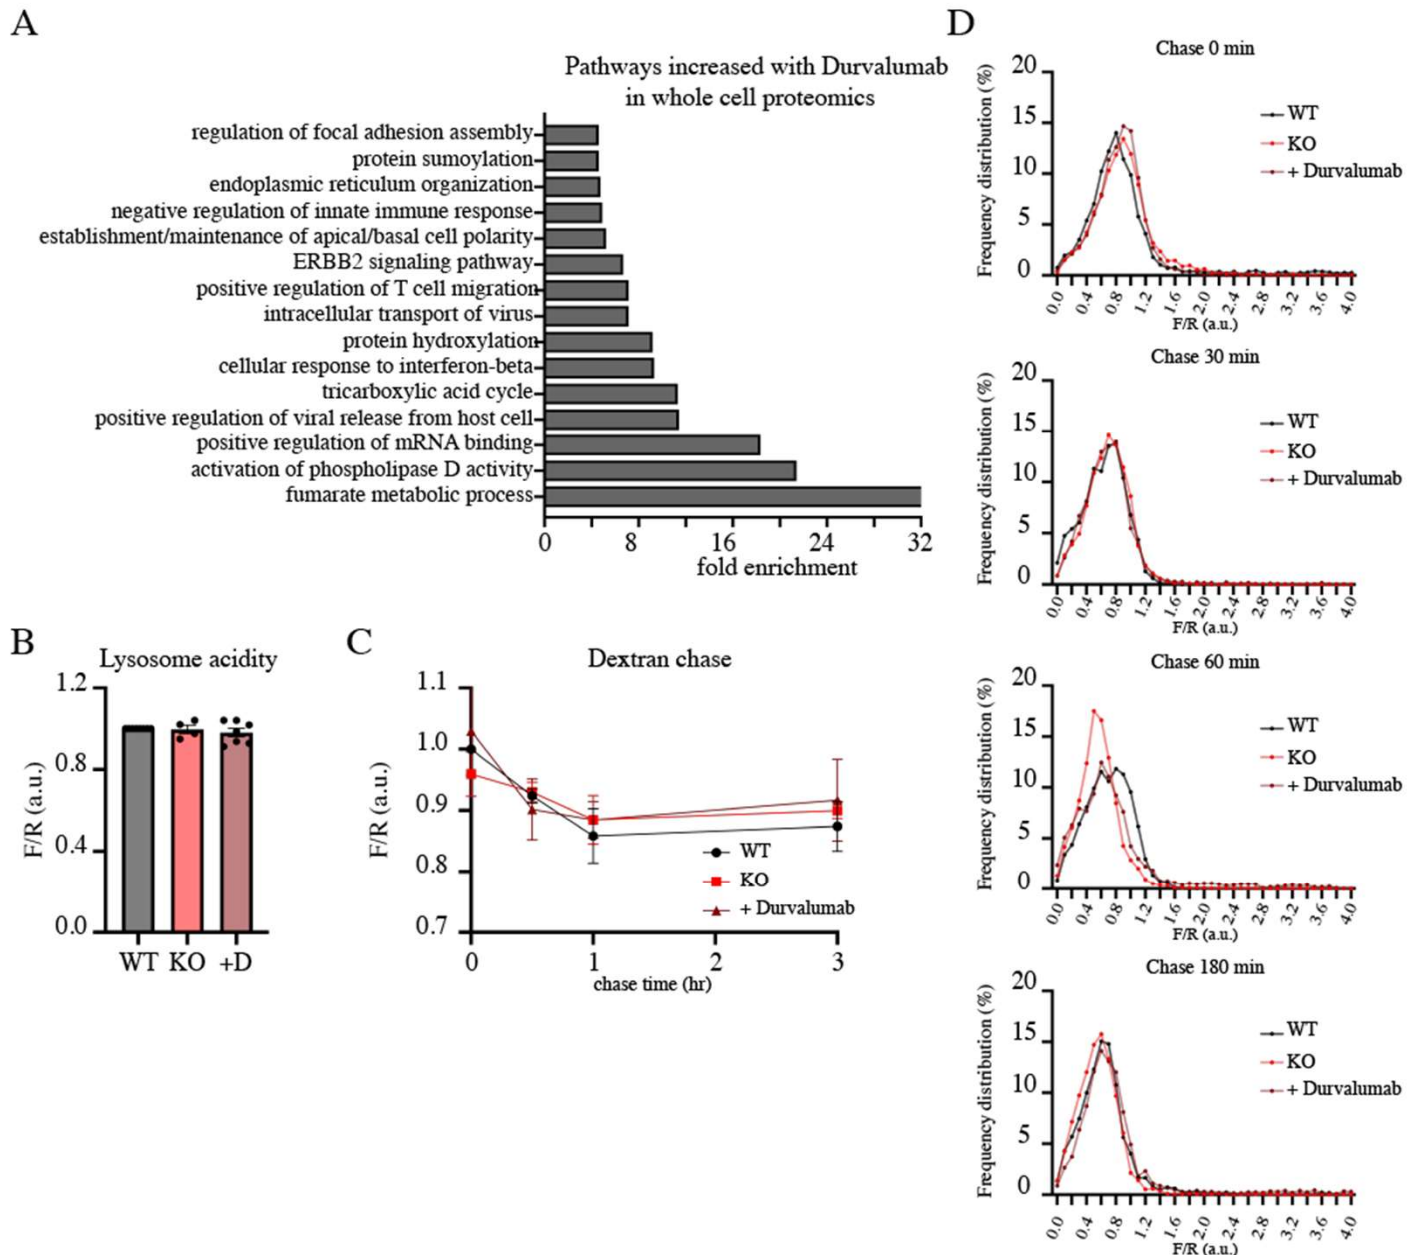

**Figure Supplemental 4. Durvalumab affects whole cell proteomics and EV secretion in EGFR mutant cells**

- Biological processes representing proteins that are increased in whole cell extract of H1650 cells treated with Durvalumab (10 $\mu$ g/mL, 48 hr) over untreated cells.
- Lysosomal acidity in H1650 cells with PD-L1 KO or treated with  $\alpha$ PD-L1 antibody. Fluorescein and rhodamine labeled dextran was pulsed into cell growth media at 1mg/mL for 16 hours and chased for 0-3 hr. Cells were imaged live and fluorescein/rhodamine (F/R) ratio was calculated for regions automatically determined by rhodamine threshold. Fluorescein/rhodamine ratio in H1650 following 16 hr pulse and 3 hr chase of labeled dextran is shown.  $\alpha$ PD-L1 antibody (10 $\mu$ g/mL) was added during the pulse and maintained in the chase. Each data point is an experiment. One sample t-test.
- Lysosomal maturation as shown by average fluorescein/rhodamine ratio during 3 hr dextran chase in  $\alpha$ PD-L1 antibody treated or PD-L1 KO H1650 cells.  $\alpha$ PD-L1 antibody (10 $\mu$ g/mL) was added during the 16 hr pulse and maintained in the chase. N=3
- Lysosomal maturation as shown by fluorescein/rhodamine frequency distribution of dextran labeled compartments during 3 hr chase. Representative experiment

All error bars = SEM. \*  $\leq 0.05$ , \*\*  $\leq 0.01$ , \*\*\*  $\leq 0.001$

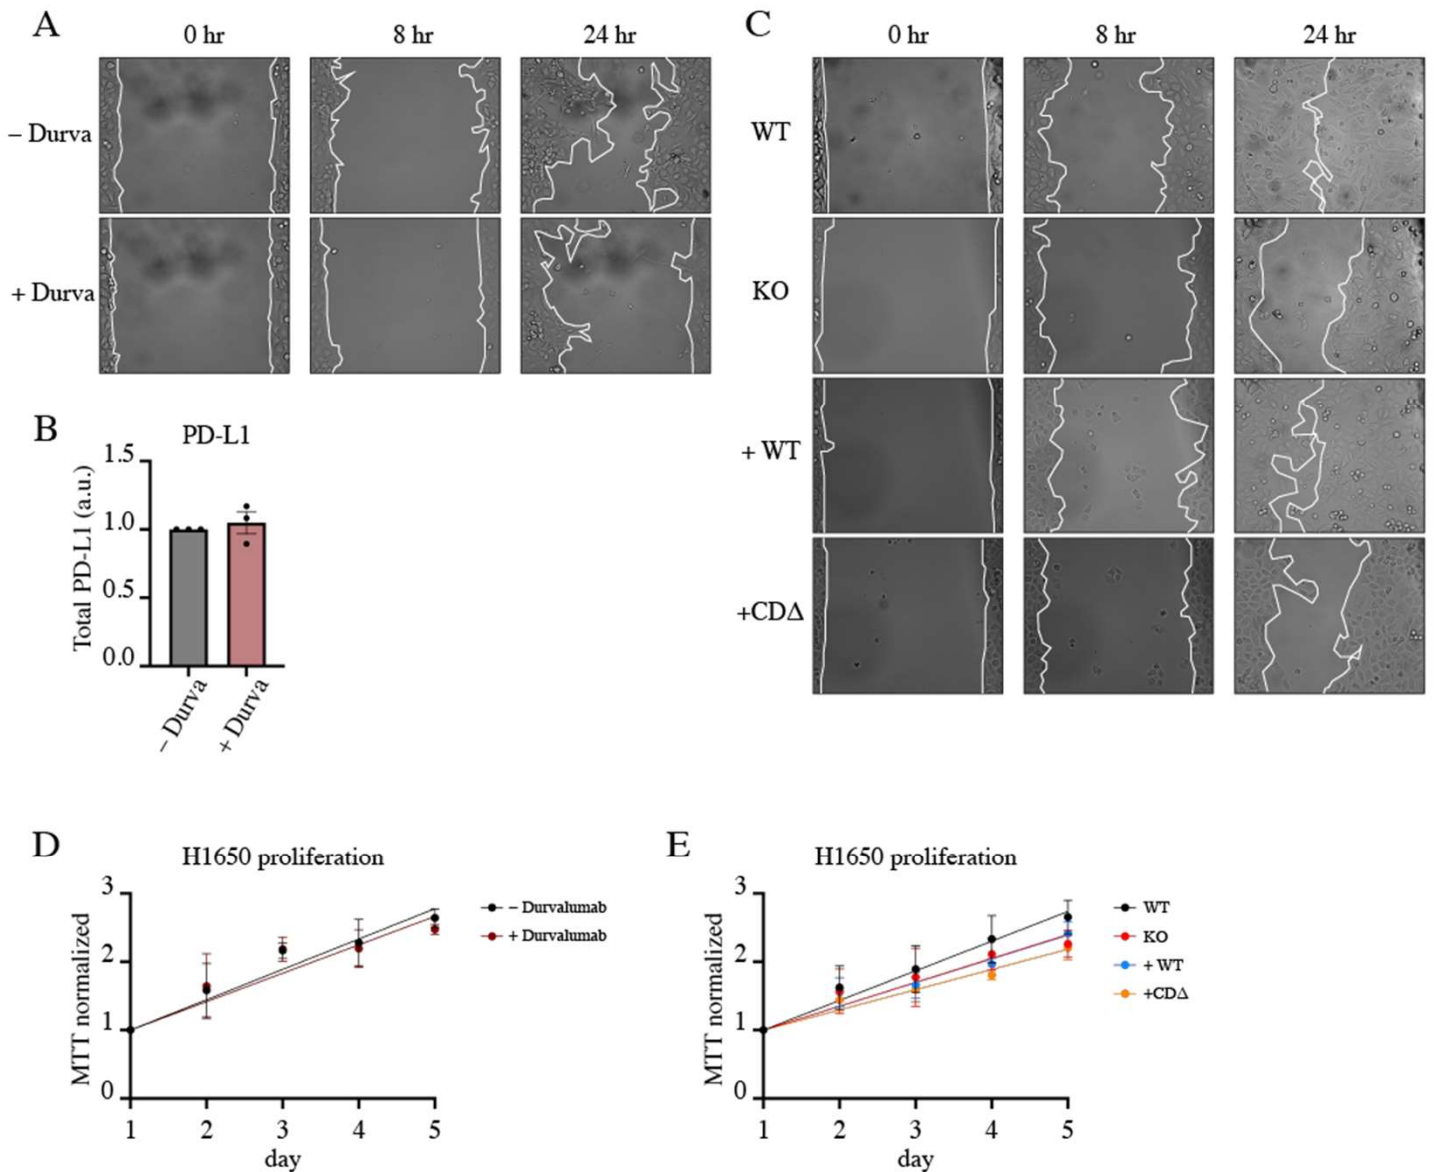

**Figure Supplemental 5. PD-L1 controls cell migration in EGFR mutant cells**

- A. Timelapse images of scratch assay at 0, 8 and 24 hr in H1650 cells treated with Durvalumab (10 $\mu$ g/mL). Leading edge of the cells are marked in white. Cells were in serum-free media for the duration of the assay.
- B. PD-L1 protein expression in H1650 treated with Durvalumab (10 $\mu$ g/mL) for 5 days. Each data point is an experiment. One sample t-test.
- C. Timelapse images of scratch assay at 0, 8 and 24 hr in H1650 KO rescue cells. Leading edge of the cells are marked in white. Cells were in serum complete media for the duration of the assay.
- D. Cell proliferation as measured by MTT assay in H1650 cells treated with Durvalumab (10 $\mu$ g/mL). N=2 Difference in slope values is calculated.
- E. Cell proliferation as measured by MTT assay in H1650 KO rescue cells. N=3 Difference in slope values is calculated.

All error bars = SEM. \*  $\leq 0.05$ , \*\*  $\leq 0.01$ , \*\*\*  $\leq 0.001$

**Table S1. Proteins in PD-L1 proximity (overlapping list of N=5 experiments)**

| #  | Uniprot | Gene name | Protein name                                                           |
|----|---------|-----------|------------------------------------------------------------------------|
| 1  | Q2M2I8  | AAK1      | AP2-associated protein kinase 1                                        |
| 2  | P49588  | AARS      | Alanine-tRNA ligase, cytoplasmic                                       |
| 3  | P33527  | ABCC1     | Multidrug resistance-associated protein 1                              |
| 4  | Q8N2K0  | ABHD12    | Monoacylglycerol lipase ABHD12                                         |
| 5  | Q8IZP0  | ABI1      | Abl interactor 1                                                       |
| 6  | Q9NYB9  | ABI2      | Abl interactor 2                                                       |
| 7  | P53396  | ACLY      | ATP-citrate synthase                                                   |
| 8  | O60488  | ACSL4     | Long-chain-fatty-acid-CoA ligase 4                                     |
| 9  | P12814  | ACTN1     | Alpha-actinin-1                                                        |
| 10 | O43707  | ACTN4     | Alpha-actinin-4                                                        |
| 11 | P61160  | ACTR2     | Actin-related protein 2                                                |
| 12 | P61158  | ACTR3     | Actin-related protein 3                                                |
| 13 | Q13443  | ADAM9     | Disintegrin and metalloproteinase domain-containing protein 9          |
| 14 | P35611  | ADD1      | Alpha-adducin                                                          |
| 15 | Q9UEY8  | ADD3      | Gamma-adducin                                                          |
| 16 | P30520  | ADSS      | Adenylosuccinate synthetase isozyme 2                                  |
| 17 | Q09666  | AHNAK     | Neuroblast differentiation-associated protein AHNAK                    |
| 18 | Q8IVF2  | AHNAK2    | Protein AHNAK2                                                         |
| 19 | Q9Y4K1  | AIM1      | Absent in melanoma 1 protein                                           |
| 20 | Q96IF1  | AJUBA     | LIM domain-containing protein ajuba                                    |
| 21 | Q9UKA4  | AKAP11    | A-kinase anchor protein 11                                             |
| 22 | Q02952  | AKAP12    | A-kinase anchor protein 12                                             |
| 23 | Q12802  | AKAP13    | A-kinase anchor protein 13                                             |
| 24 | Q9Y2D5  | AKAP2     | A-kinase anchor protein 2                                              |
| 25 | Q9Y2J4  | AMOTL2    | Angiomotin-like protein 2                                              |
| 26 | Q8IWZ3  | ANKHD1    | Ankyrin repeat and KH domain-containing protein 1                      |
| 27 | O75179  | ANKRD17   | Ankyrin repeat domain-containing protein 17                            |
| 28 | Q9NQW6  | ANLN      | Actin-binding protein anillin                                          |
| 29 | P50995  | ANXA11    | Annexin A11                                                            |
| 30 | P08133  | ANXA6     | Annexin A6                                                             |
| 31 | P20073  | ANXA7     | Annexin A7                                                             |
| 32 | Q8N6T3  | ARFGAP1   | ADP-ribosylation factor GTPase-activating protein 1                    |
| 33 | Q5T5U3  | ARHGAP21  | Rho GTPase-activating protein 21                                       |
| 34 | Q52LW3  | ARHGAP29  | Rho GTPase-activating protein 29                                       |
| 35 | O15013  | ARHGEF10  | Rho guanine nucleotide exchange factor 10                              |
| 36 | Q96PE2  | ARHGEF17  | Rho guanine nucleotide exchange factor 17                              |
| 37 | Q9ULH1  | ASAP1     | Arf-GAP with SH3 domain, ANK repeat and PH domain-containing protein 1 |
| 38 | Q9NT62  | ATG3      | Ubiquitin-like-conjugating enzyme ATG3                                 |
| 39 | P20020  | ATP2B1    | Plasma membrane calcium-transporting ATPase 1                          |
| 40 | P23634  | ATP2B4    | Plasma membrane calcium-transporting ATPase 4                          |
| 41 | Q99700  | ATXN2     | Ataxin-2                                                               |
| 42 | Q8WWM7  | ATXN2L    | Ataxin-2-like protein                                                  |
| 43 | O14965  | AURKA     | Aurora kinase A                                                        |
| 44 | P30530  | AXL       | Tyrosine-protein kinase receptor UFO                                   |
| 45 | O95817  | BAG3      | BAG family molecular chaperone regulator 3                             |
| 46 | Q9UQB8  | BAIAP2    | Brain-specific angiogenesis inhibitor 1-associated protein 2           |
| 47 | P80723  | BASP1     | Brain acid soluble protein 1                                           |

|    |        |          |                                                                                                            |
|----|--------|----------|------------------------------------------------------------------------------------------------------------|
| 48 | P56945 | BCAR1    | Breast cancer anti-estrogen resistance protein 1                                                           |
| 49 | P11274 | BCR      | Breakpoint cluster region protein                                                                          |
| 50 | O60566 | BUB1B    | Mitotic checkpoint serine/threonine-protein kinase BUB1 beta                                               |
| 51 | Q6ZUT6 | C15orf52 | Uncharacterized protein C15orf52                                                                           |
| 52 | Q9HB71 | CACYBP   | Calcyclin-binding protein                                                                                  |
| 53 | P27708 | CAD      | CAD protein;Glutamine-dependent carbamoyl-phosphate synthase;Aspartate carbamoyltransferase;Dihydroorotase |
| 54 | Q05682 | CALD1    | Caldesmon                                                                                                  |
| 55 | P40123 | CAP2     | Adenylyl cyclase-associated protein 2                                                                      |
| 56 | P40121 | CAPG     | Macrophage-capping protein                                                                                 |
| 57 | P17655 | CAPN2    | Calpain-2 catalytic subunit                                                                                |
| 58 | Q14444 | CAPRIN1  | Caprin-1                                                                                                   |
| 59 | P47755 | CAPZA2   | F-actin-capping protein subunit alpha-2                                                                    |
| 60 | O14936 | CASK     | Peripheral plasma membrane protein CASK                                                                    |
| 61 | P20810 | CAST     | Calpastatin                                                                                                |
| 62 | Q03135 | CAV1     | Caveolin-1                                                                                                 |
| 63 | Q9NZQ7 | CD274    | Programmed cell death 1 ligand 1                                                                           |
| 64 | Q9Y5K6 | CD2AP    | CD2-associated protein                                                                                     |
| 65 | Q16543 | CDC37    | Hsp90 co-chaperone Cdc37;Hsp90 co-chaperone Cdc37, N-terminally processed                                  |
| 66 | P60953 | CDC42    | Cell division control protein 42 homolog                                                                   |
| 67 | Q5VT25 | CDC42BPA | Serine/threonine-protein kinase MRCK alpha                                                                 |
| 68 | Q9Y5S2 | CDC42BPB | Serine/threonine-protein kinase MRCK beta                                                                  |
| 69 | P19022 | CDH2     | Cadherin-2                                                                                                 |
| 70 | Q9UKY7 | CDV3     | Protein CDV3 homolog                                                                                       |
| 71 | Q5SW79 | CEP170   | Centrosomal protein of 170 kDa                                                                             |
| 72 | Q53EZ4 | CEP55    | Centrosomal protein of 55 kDa                                                                              |
| 73 | Q8IW35 | CEP97    | Centrosomal protein of 97 kDa                                                                              |
| 74 | Q9UHD1 | CHORDC1  | Cysteine and histidine-rich domain-containing protein 1                                                    |
| 75 | Q6FI81 | CIAPIN1  | Anamorsin                                                                                                  |
| 76 | O14578 | CIT      | Citron Rho-interacting kinase                                                                              |
| 77 | Q14008 | CKAP5    | Cytoskeleton-associated protein 5                                                                          |
| 78 | Q7Z460 | CLASP1   | CLIP-associating protein 1                                                                                 |
| 79 | Q00610 | CLTC     | Clathrin heavy chain 1                                                                                     |
| 80 | Q99439 | CNN2     | Calponin-2                                                                                                 |
| 81 | Q15417 | CNN3     | Calponin-3                                                                                                 |
| 82 | A5YKK6 | CNOT1    | CCR4-NOT transcription complex subunit 1                                                                   |
| 83 | P20908 | COL5A1   | Collagen alpha-1(V) chain                                                                                  |
| 84 | O75131 | CPNE3    | Copine-3                                                                                                   |
| 85 | P46109 | CRKL     | Crk-like protein                                                                                           |
| 86 | Q6UVK1 | CSPG4    | Chondroitin sulfate proteoglycan 4                                                                         |
| 87 | P21291 | CSRP1    | Cysteine and glycine-rich protein 1                                                                        |
| 88 | P35221 | CTNNA1   | Catenin alpha-1                                                                                            |
| 89 | P35222 | CTNNB1   | Catenin beta-1                                                                                             |
| 90 | O60716 | CTNND1   | Catenin delta-1                                                                                            |
| 91 | Q14247 | CTTN     | Src substrate cortactin                                                                                    |
| 92 | Q7L576 | CYFIP1   | Cytoplasmic FMR1-interacting protein 1                                                                     |
| 93 | Q16643 | DBN1     | Drebrin                                                                                                    |
| 94 | Q9UJU6 | DBNL     | Drebrin-like protein                                                                                       |
| 95 | Q8N8Z6 | DCBLD1   | Discoidin, CUB and LCCL domain-containing protein 1                                                        |

|     |        |         |                                                                                                                                                                                                                                                                                                                                 |
|-----|--------|---------|---------------------------------------------------------------------------------------------------------------------------------------------------------------------------------------------------------------------------------------------------------------------------------------------------------------------------------|
| 96  | Q96PD2 | DCBLD2  | Discoidin, CUB and LCCL domain-containing protein 2                                                                                                                                                                                                                                                                             |
| 97  | Q13561 | DCTN2   | Dynactin subunit 2                                                                                                                                                                                                                                                                                                              |
| 98  | Q9UHI6 | DDX20   | Probable ATP-dependent RNA helicase DDX20                                                                                                                                                                                                                                                                                       |
| 99  | Q5VZ89 | DENND4C | DENN domain-containing protein 4C                                                                                                                                                                                                                                                                                               |
| 100 | O60610 | DIAPH1  | Protein diaphanous homolog 1                                                                                                                                                                                                                                                                                                    |
| 101 | Q12959 | DLG1    | Disks large homolog 1                                                                                                                                                                                                                                                                                                           |
| 102 | Q99615 | DNAJC7  | DnaJ homolog subfamily C member 7                                                                                                                                                                                                                                                                                               |
| 103 | Q6XZF7 | DNMBP   | Dynamin-binding protein                                                                                                                                                                                                                                                                                                         |
| 104 | Q96BY6 | DOCK10  | Dedicator of cytokinesis protein 10                                                                                                                                                                                                                                                                                             |
| 105 | Q96N67 | DOCK7   | Dedicator of cytokinesis protein 7                                                                                                                                                                                                                                                                                              |
| 106 | Q14126 | DSG2    | Desmoglein-2                                                                                                                                                                                                                                                                                                                    |
| 107 | Q03001 | DST     | Dystonin                                                                                                                                                                                                                                                                                                                        |
| 108 | P33316 | DUT     | Deoxyuridine 5'-triphosphate nucleotidohydrolase, mitochondrial                                                                                                                                                                                                                                                                 |
| 109 | O75923 | DYSF    | Dysferlin                                                                                                                                                                                                                                                                                                                       |
| 110 | Q6P2E9 | EDC4    | Enhancer of mRNA-decapping protein 4                                                                                                                                                                                                                                                                                            |
| 111 | P00533 | EGFR    | Epidermal growth factor receptor                                                                                                                                                                                                                                                                                                |
| 112 | Q14152 | EIF3A   | Eukaryotic translation initiation factor 3 subunit A                                                                                                                                                                                                                                                                            |
| 113 | Q13347 | EIF3I   | Eukaryotic translation initiation factor 3 subunit I                                                                                                                                                                                                                                                                            |
| 114 | P23588 | EIF4B   | Eukaryotic translation initiation factor 4B                                                                                                                                                                                                                                                                                     |
| 115 | Q04637 | EIF4G1  | Eukaryotic translation initiation factor 4 gamma 1                                                                                                                                                                                                                                                                              |
| 116 | Q9HC35 | EML4    | Echinoderm microtubule-associated protein-like 4                                                                                                                                                                                                                                                                                |
| 117 | O43491 | EPB41L2 | Band 4.1-like protein 2                                                                                                                                                                                                                                                                                                         |
| 118 | P29323 | EPHB2   | Ephrin type-B receptor 2                                                                                                                                                                                                                                                                                                        |
| 119 | P07814 | EPRS    | Bifunctional glutamate/proline--tRNA ligase;Glutamate--tRNA ligase;Proline--tRNA ligase                                                                                                                                                                                                                                         |
| 120 | Q9UBC2 | EPS15L1 | Epidermal growth factor receptor substrate 15-like 1                                                                                                                                                                                                                                                                            |
| 121 | Q12929 | EPS8    | Epidermal growth factor receptor kinase substrate 8                                                                                                                                                                                                                                                                             |
| 122 | Q9H6S3 | EPS8L2  | Epidermal growth factor receptor kinase substrate 8-like protein 2                                                                                                                                                                                                                                                              |
| 123 | P04626 | ERBB2   | Receptor tyrosine-protein kinase erbB-2                                                                                                                                                                                                                                                                                         |
| 124 | Q96RT1 | ERBB2IP | Protein LAP2                                                                                                                                                                                                                                                                                                                    |
| 125 | Q2NKX8 | ERCC6L  | DNA excision repair protein ERCC-6-like                                                                                                                                                                                                                                                                                         |
| 126 | Q9BSJ8 | ESYT1   | Extended synaptotagmin-1                                                                                                                                                                                                                                                                                                        |
| 127 | P15311 | EZR     | Ezrin                                                                                                                                                                                                                                                                                                                           |
| 128 | Q9BZQ8 | FAM129A | Protein Niban                                                                                                                                                                                                                                                                                                                   |
| 129 | Q96TA1 | FAM129B | Niban-like protein 1                                                                                                                                                                                                                                                                                                            |
| 130 | Q6ZS17 | FAM65A  | Protein FAM65A                                                                                                                                                                                                                                                                                                                  |
| 131 | Q9H4H8 | FAM83D  | Protein FAM83D                                                                                                                                                                                                                                                                                                                  |
| 132 | O94887 | FARP2   | FERM, RhoGEF and pleckstrin domain-containing protein 2                                                                                                                                                                                                                                                                         |
| 133 | Q9Y285 | FARSA   | Phenylalanine--tRNA ligase alpha subunit                                                                                                                                                                                                                                                                                        |
| 134 | P49327 | FASN    | Fatty acid synthase;[Acyl-carrier-protein] S-acetyltransferase;[Acyl-carrier-protein] S-malonyltransferase;3-oxoacyl-[acyl-carrier-protein] synthase;3-oxoacyl-[acyl-carrier-protein] reductase;3-hydroxyacyl-[acyl-carrier-protein] dehydratase;Enoyl-[acyl-carrier-protein] reductase;Oleoyl-[acyl-carrier-protein] hydrolase |
| 135 | Q8WUP2 | FBLIM1  | Filamin-binding LIM protein 1                                                                                                                                                                                                                                                                                                   |
| 136 | Q96AC1 | FERMT2  | Fermitin family homolog 2                                                                                                                                                                                                                                                                                                       |
| 137 | Q4L180 | FILIP1L | Filamin A-interacting protein 1-like                                                                                                                                                                                                                                                                                            |
| 138 | Q5T1M5 | FKBP15  | FK506-binding protein 15                                                                                                                                                                                                                                                                                                        |
| 139 | P21333 | FLNA    | Filamin-A                                                                                                                                                                                                                                                                                                                       |
| 140 | O75369 | FLNB    | Filamin-B                                                                                                                                                                                                                                                                                                                       |



|     |        |        |                                                                                                                                                                                                                                                                                                        |
|-----|--------|--------|--------------------------------------------------------------------------------------------------------------------------------------------------------------------------------------------------------------------------------------------------------------------------------------------------------|
| 141 | Q14315 | FLNC   | Filamin-C                                                                                                                                                                                                                                                                                              |
| 142 | O75955 | FLOT1  | Flotillin-1                                                                                                                                                                                                                                                                                            |
| 143 | Q9P2Q2 | FRMD4A | FERM domain-containing protein 4A                                                                                                                                                                                                                                                                      |
| 144 | O94915 | FRYL   | Protein furry homolog-like                                                                                                                                                                                                                                                                             |
| 145 | P11413 | G6PD   | Glucose-6-phosphate 1-dehydrogenase                                                                                                                                                                                                                                                                    |
| 146 | O14976 | GAK    | Cyclin-G-associated kinase                                                                                                                                                                                                                                                                             |
| 147 | Q14C86 | GAPVD1 | GTPase-activating protein and VPS9 domain-containing protein 1                                                                                                                                                                                                                                         |
| 148 | P22102 | GART   | Trifunctional purine biosynthetic protein adenosine-3;Phosphoribosylamine-glycine ligase;Phosphoribosylformylglycinamide cyclo-ligase;Phosphoribosylglycinamide formyltransferase                                                                                                                      |
| 149 | Q04446 | GBE1   | 1,4-alpha-glucan-branching enzyme                                                                                                                                                                                                                                                                      |
| 150 | Q92538 | GBF1   | Golgi-specific brefeldin A-resistance guanine nucleotide exchange factor 1                                                                                                                                                                                                                             |
| 151 | Q8TEQ6 | GEMIN5 | Gem-associated protein 5                                                                                                                                                                                                                                                                               |
| 152 | Q6Y7W6 | GIGYF2 | PERQ amino acid-rich with GYF domain-containing protein 2                                                                                                                                                                                                                                              |
| 153 | O76003 | GLRX3  | Glutaredoxin-3                                                                                                                                                                                                                                                                                         |
| 154 | P29992 | GNA11  | Guanine nucleotide-binding protein subunit alpha-11                                                                                                                                                                                                                                                    |
| 155 | P04899 | GNAI2  | Guanine nucleotide-binding protein G(i) subunit alpha-2                                                                                                                                                                                                                                                |
| 156 | P08754 | GNAI3  | Guanine nucleotide-binding protein G(k) subunit alpha                                                                                                                                                                                                                                                  |
| 157 | P50148 | GNAQ   | Guanine nucleotide-binding protein G(q) subunit alpha                                                                                                                                                                                                                                                  |
| 158 | Q722K8 | GPRIN1 | G protein-regulated inducer of neurite outgrowth 1                                                                                                                                                                                                                                                     |
| 159 | P15170 | GSPT1  | Eukaryotic peptide chain release factor GTP-binding subunit ERF3A                                                                                                                                                                                                                                      |
| 160 | P12081 | HARS   | Histidine-tRNA ligase, cytoplasmic                                                                                                                                                                                                                                                                     |
| 161 | P51610 | HCFC1  | Host cell factor 1;HCF N-terminal chain 1;HCF N-terminal chain 2;HCF N-terminal chain 3;HCF N-terminal chain 4;HCF N-terminal chain 5;HCF N-terminal chain 6;HCF C-terminal chain 1;HCF C-terminal chain 2;HCF C-terminal chain 3;HCF C-terminal chain 4;HCF C-terminal chain 5;HCF C-terminal chain 6 |
| 162 | Q9H583 | HEATR1 | HEAT repeat-containing protein 1;HEAT repeat-containing protein 1, N-terminally processed                                                                                                                                                                                                              |
| 163 | Q9ULT8 | HECTD1 | E3 ubiquitin-protein ligase HECTD1                                                                                                                                                                                                                                                                     |
| 164 | O14964 | HGS    | Hepatocyte growth factor-regulated tyrosine kinase substrate                                                                                                                                                                                                                                           |
| 165 | P30443 | HLA-A  | HLA class I histocompatibility antigen, A-1 alpha chain                                                                                                                                                                                                                                                |
| 166 | P01892 | HLA-A  | HLA class I histocompatibility antigen, A-2 alpha chain                                                                                                                                                                                                                                                |
| 167 | P04439 | HLA-A  | HLA class I histocompatibility antigen, A-3 alpha chain                                                                                                                                                                                                                                                |
| 168 | P10319 | HLA-B  | HLA class I histocompatibility antigen, B-58 alpha chain                                                                                                                                                                                                                                               |
| 169 | P18465 | HLA-B  | HLA class I histocompatibility antigen, B-57 alpha chain                                                                                                                                                                                                                                               |
| 170 | P30479 | HLA-B  | HLA class I histocompatibility antigen, B-41 alpha chain                                                                                                                                                                                                                                               |
| 171 | P30483 | HLA-B  | HLA class I histocompatibility antigen, B-45 alpha chain                                                                                                                                                                                                                                               |
| 172 | P10321 | HLA-C  | HLA class I histocompatibility antigen, Cw-7 alpha chain                                                                                                                                                                                                                                               |
| 173 | Q29963 | HLA-C  | HLA class I histocompatibility antigen, Cw-6 alpha chain                                                                                                                                                                                                                                               |
| 174 | P30508 | HLA-C  | HLA class I histocompatibility antigen, Cw-12 alpha chain                                                                                                                                                                                                                                              |
| 175 | P30519 | HMOX2  | Heme oxygenase 2                                                                                                                                                                                                                                                                                       |
| 176 | Q9H910 | HN1L   | Hematological and neurological expressed 1-like protein                                                                                                                                                                                                                                                |
| 177 | Q72627 | HUWE1  | E3 ubiquitin-protein ligase HUWE1                                                                                                                                                                                                                                                                      |
| 178 | P41252 | IARS   | Isoleucine-tRNA ligase, cytoplasmic                                                                                                                                                                                                                                                                    |
| 179 | P12268 | IMPDH2 | Inosine-5'-monophosphate dehydrogenase 2                                                                                                                                                                                                                                                               |
| 180 | Q27J81 | INF2   | Inverted formin-2                                                                                                                                                                                                                                                                                      |
| 181 | O15357 | INPPL1 | Phosphatidylinositol 3,4,5-trisphosphate 5-phosphatase 2                                                                                                                                                                                                                                               |
| 182 | P53990 | IST1   | IST1 homolog                                                                                                                                                                                                                                                                                           |
| 183 | P26006 | ITGA3  | Integrin alpha-3;Integrin alpha-3 heavy chain;Integrin alpha-3 light chain                                                                                                                                                                                                                             |

|     |        |           |                                                                                                        |
|-----|--------|-----------|--------------------------------------------------------------------------------------------------------|
| 184 | P23229 | ITGA6     | Integrin alpha-6;Integrin alpha-6 heavy chain;Integrin alpha-6 light chain;Processed integrin alpha-6  |
| 185 | P05556 | ITGB1     | Integrin beta-1                                                                                        |
| 186 | P16144 | ITGB4     | Integrin beta-4                                                                                        |
| 187 | Q14573 | ITPR3     | Inositol 1,4,5-trisphosphate receptor type 3                                                           |
| 188 | P23458 | JAK1      | Tyrosine-protein kinase JAK1                                                                           |
| 189 | Q63ZY3 | KANK2     | KN motif and ankyrin repeat domain-containing protein 2                                                |
| 190 | Q14145 | KEAP1     | Kelch-like ECH-associated protein 1                                                                    |
| 191 | Q8TCG1 | KIAA1524  | Protein CIP2A                                                                                          |
| 192 | Q9ULH0 | KIDINS220 | Kinase D-interacting substrate of 220 kDa                                                              |
| 193 | P52732 | KIF11     | Kinesin-like protein KIF11                                                                             |
| 194 | Q9H1H9 | KIF13A    | Kinesin-like protein KIF13A                                                                            |
| 195 | Q15058 | KIF14     | Kinesin-like protein KIF14                                                                             |
| 196 | O60333 | KIF1B     | Kinesin-like protein KIF1B                                                                             |
| 197 | O95235 | KIF20A    | Kinesin-like protein KIF20A                                                                            |
| 198 | O00139 | KIF2A     | Kinesin-like protein KIF2A                                                                             |
| 199 | Q99661 | KIF2C     | Kinesin-like protein KIF2C                                                                             |
| 200 | O95239 | KIF4A     | Chromosome-associated kinesin KIF4A                                                                    |
| 201 | P33176 | KIF5B     | Kinesin-1 heavy chain                                                                                  |
| 202 | Q07866 | KLC1      | Kinesin light chain 1                                                                                  |
| 203 | Q9H0B6 | KLC2      | Kinesin light chain 2                                                                                  |
| 204 | O60684 | KPNA6     | Importin subunit alpha-7                                                                               |
| 205 | Q14974 | KPNB1     | Importin subunit beta-1                                                                                |
| 206 | Q9NS86 | LANCL2    | LanC-like protein 2                                                                                    |
| 207 | Q14847 | LASP1     | LIM and SH3 domain protein 1                                                                           |
| 208 | P17931 | LGALS3    | Galectin-3                                                                                             |
| 209 | Q9UHB6 | LIMA1     | LIM domain and actin-binding protein 1                                                                 |
| 210 | Q9UPQ0 | LIMCH1    | LIM and calponin homology domains-containing protein 1                                                 |
| 211 | Q9UGP4 | LIMD1     | LIM domain-containing protein 1                                                                        |
| 212 | P20700 | LMNB1     | Lamin-B1                                                                                               |
| 213 | Q8WW11 | LMO7      | LIM domain only protein 7                                                                              |
| 214 | Q93052 | LPP       | Lipoma-preferred partner                                                                               |
| 215 | Q32MZ4 | LRRFIP1   | Leucine-rich repeat flightless-interacting protein 1                                                   |
| 216 | Q86V48 | LUZP1     | Leucine zipper protein 1                                                                               |
| 217 | Q9UPN3 | MACF1     | Microtubule-actin cross-linking factor 1, isoforms 1/2/3/5                                             |
| 218 | P46821 | MAP1B     | Microtubule-associated protein 1B;MAP1B heavy chain;MAP1 light chain LC1                               |
| 219 | P27816 | MAP4      | Microtubule-associated protein 4                                                                       |
| 220 | Q15691 | MAPRE1    | Microtubule-associated protein RP/EB family member 1                                                   |
| 221 | P43121 | MCAM      | Cell surface glycoprotein MUC18                                                                        |
| 222 | P53582 | METAP1    | Methionine aminopeptidase 1                                                                            |
| 223 | O60502 | MGEA5     | Protein O-GlcNAcase                                                                                    |
| 224 | P55196 | MLLT4     | Afadin                                                                                                 |
| 225 | O75970 | MPDZ      | Multiple PDZ domain protein                                                                            |
| 226 | P26038 | MSN       | Moesin                                                                                                 |
| 227 | Q9Y4B5 | MTCL1     | Microtubule cross-linking factor 1                                                                     |
| 228 | P35580 | MYH10     | Myosin-10                                                                                              |
| 229 | Q15746 | MYLK      | Myosin light chain kinase, smooth muscle;Myosin light chain kinase, smooth muscle, deglutamylated form |
| 230 | Q92614 | MYO18A    | Unconventional myosin-XVIIIa                                                                           |
| 231 | Q9Y4I1 | MYO5A     | Unconventional myosin-Va                                                                               |

|     |        |          |                                                                                                                                |
|-----|--------|----------|--------------------------------------------------------------------------------------------------------------------------------|
| 232 | Q9UM54 | MYO6     | Unconventional myosin-VI                                                                                                       |
| 233 | Q9NZM1 | MYOF     | Myoferlin                                                                                                                      |
| 234 | P43490 | NAMPT    | Nicotinamide phosphoribosyltransferase                                                                                         |
| 235 | Q6PIU2 | NCEH1    | Neutral cholesterol ester hydrolase 1                                                                                          |
| 236 | Q9Y2A7 | NCKAP1   | Nck-associated protein 1                                                                                                       |
| 237 | O14777 | NDC80    | Kinetochore protein NDC80 homolog                                                                                              |
| 238 | Q9UGV2 | NDRG3    | Protein NDRG3                                                                                                                  |
| 239 | Q8NHV4 | NEDD1    | Protein NEDD1                                                                                                                  |
| 240 | Q8TD19 | NEK9     | Serine/threonine-protein kinase Nek9                                                                                           |
| 241 | Q00653 | NFKB2    | Nuclear factor NF-kappa-B p100 subunit;Nuclear factor NF-kappa-B p52 subunit                                                   |
| 242 | P30419 | NMT1     | Glycylpeptide N-tetradecanoyltransferase 1                                                                                     |
| 243 | Q04721 | NOTCH2   | Neurogenic locus notch homolog protein 2;Notch 2 extracellular truncation;Notch 2 intracellular domain                         |
| 244 | O14786 | NRP1     | Neuropilin-1                                                                                                                   |
| 245 | Q9UNZ2 | NSFL1C   | NSFL1 cofactor p47                                                                                                             |
| 246 | Q9Y5Y2 | NUBP2    | Cytosolic Fe-S cluster assembly factor NUBP2                                                                                   |
| 247 | Q9BZD4 | NUF2     | Kinetochore protein Nuf2                                                                                                       |
| 248 | P49790 | NUP153   | Nuclear pore complex protein Nup153                                                                                            |
| 249 | P22059 | OSBP     | Oxysterol-binding protein 1                                                                                                    |
| 250 | Q96SU4 | OSBPL9   | Oxysterol-binding protein-related protein 9                                                                                    |
| 251 | Q96FW1 | OTUB1    | Ubiquitin thioesterase OTUB1                                                                                                   |
| 252 | P07237 | P4HB     | Protein disulfide-isomerase                                                                                                    |
| 253 | Q9UNF0 | PACSIN2  | Protein kinase C and casein kinase substrate in neurons protein 2                                                              |
| 254 | P22234 | PAICS    | Multifunctional protein ADE2;Phosphoribosylaminoimidazole-succinocarboxamide synthase;Phosphoribosylaminoimidazole carboxylase |
| 255 | Q13177 | PAK2     | Serine/threonine-protein kinase PAK 2;PAK-2p27;PAK-2p34                                                                        |
| 256 | Q8WX93 | PALLD    | Palladin                                                                                                                       |
| 257 | Q8TEW0 | PARD3    | Partitioning defective 3 homolog                                                                                               |
| 258 | Q9UKK3 | PARP4    | Poly [ADP-ribose] polymerase 4                                                                                                 |
| 259 | Q96IZ0 | PAWR     | PRKC apoptosis WT1 regulator protein                                                                                           |
| 260 | P22061 | PCMT1    | Protein-L-isoaspartate(D-aspartate) O-methyltransferase                                                                        |
| 261 | O75340 | PDCD6    | Programmed cell death protein 6                                                                                                |
| 262 | Q8WUM4 | PDCD6IP  | Programmed cell death 6-interacting protein                                                                                    |
| 263 | O00151 | PDLIM1   | PDZ and LIM domain protein 1                                                                                                   |
| 264 | P50479 | PDLIM4   | PDZ and LIM domain protein 4                                                                                                   |
| 265 | Q96HC4 | PDLIM5   | PDZ and LIM domain protein 5                                                                                                   |
| 266 | Q9UBV8 | PEF1     | Peflin                                                                                                                         |
| 267 | O15173 | PGRMC2   | Membrane-associated progesterone receptor component 2                                                                          |
| 268 | Q86UU1 | PHLDB1   | Pleckstrin homology-like domain family B member 1                                                                              |
| 269 | P42356 | PI4KA    | Phosphatidylinositol 4-kinase alpha                                                                                            |
| 270 | Q99959 | PKP2     | Plakophilin-2                                                                                                                  |
| 271 | Q99569 | PKP4     | Plakophilin-4                                                                                                                  |
| 272 | P19174 | PLCG1    | 1-phosphatidylinositol 4,5-bisphosphate phosphodiesterase gamma-1                                                              |
| 273 | O60664 | PLIN3    | Perilipin-3                                                                                                                    |
| 274 | P13797 | PLS3     | Plastin-3                                                                                                                      |
| 275 | O15031 | PLXNB2   | Plexin-B2                                                                                                                      |
| 276 | P29590 | PML      | Protein PML                                                                                                                    |
| 277 | O14974 | PPP1R12A | Protein phosphatase 1 regulatory subunit 12A                                                                                   |
| 278 | Q6NYC8 | PPP1R18  | Phostensin                                                                                                                     |

|     |        |         |                                                                                                                                                     |
|-----|--------|---------|-----------------------------------------------------------------------------------------------------------------------------------------------------|
| 279 | P30153 | PPP2R1A | Serine/threonine-protein phosphatase 2A 65 kDa regulatory subunit A alpha isoform                                                                   |
| 280 | Q8TF05 | PPP4R1  | Serine/threonine-protein phosphatase 4 regulatory subunit 1                                                                                         |
| 281 | O75170 | PPP6R2  | Serine/threonine-protein phosphatase 6 regulatory subunit 2                                                                                         |
| 282 | P10644 | PRKAR1A | cAMP-dependent protein kinase type I-alpha regulatory subunit;cAMP-dependent protein kinase type I-alpha regulatory subunit, N-terminally processed |
| 283 | P17252 | PRKCA   | Protein kinase C alpha type                                                                                                                         |
| 284 | Q9Y520 | PRRC2C  | Protein PRRC2C                                                                                                                                      |
| 285 | P60900 | PSMA6   | Proteasome subunit alpha type-6                                                                                                                     |
| 286 | P62195 | PSMC5   | 26S protease regulatory subunit 8                                                                                                                   |
| 287 | O00231 | PSMD11  | 26S proteasome non-ATPase regulatory subunit 11                                                                                                     |
| 288 | O00232 | PSMD12  | 26S proteasome non-ATPase regulatory subunit 12                                                                                                     |
| 289 | Q13200 | PSMD2   | 26S proteasome non-ATPase regulatory subunit 2                                                                                                      |
| 290 | Q13308 | PTK7    | Inactive tyrosine-protein kinase 7                                                                                                                  |
| 291 | Q06124 | PTPN11  | Tyrosine-protein phosphatase non-receptor type 11                                                                                                   |
| 292 | Q05209 | PTPN12  | Tyrosine-protein phosphatase non-receptor type 12                                                                                                   |
| 293 | Q15678 | PTPN14  | Tyrosine-protein phosphatase non-receptor type 14                                                                                                   |
| 294 | P18433 | PTPRA   | Receptor-type tyrosine-protein phosphatase alpha                                                                                                    |
| 295 | P10586 | PTPRF   | Receptor-type tyrosine-protein phosphatase F                                                                                                        |
| 296 | Q15262 | PTPRK   | Receptor-type tyrosine-protein phosphatase kappa                                                                                                    |
| 297 | Q6NZI2 | PTRF    | Polymerase I and transcript release factor                                                                                                          |
| 298 | Q92692 | PVRL2   | Nectin-2                                                                                                                                            |
| 299 | P49023 | PXN     | Paxillin                                                                                                                                            |
| 300 | P61106 | RAB14   | Ras-related protein Rab-14                                                                                                                          |
| 301 | P61020 | RAB5B   | Ras-related protein Rab-5B                                                                                                                          |
| 302 | P51149 | RAB7A   | Ras-related protein Rab-7a                                                                                                                          |
| 303 | Q9Y3P9 | RABGAP1 | Rab GTPase-activating protein 1                                                                                                                     |
| 304 | P63000 | RAC1    | Ras-related C3 botulinum toxin substrate 1                                                                                                          |
| 305 | P15153 | RAC2    | Ras-related C3 botulinum toxin substrate 2                                                                                                          |
| 306 | P11234 | RALB    | Ras-related protein Ral-B                                                                                                                           |
| 307 | P49792 | RANBP2  | E3 SUMO-protein ligase RanBP2                                                                                                                       |
| 308 | P46060 | RANGAP1 | Ran GTPase-activating protein 1                                                                                                                     |
| 309 | Q70E73 | RAPH1   | Ras-associated and pleckstrin homology domains-containing protein 1                                                                                 |
| 310 | Q04206 | RELA    | Transcription factor p65                                                                                                                            |
| 311 | Q14699 | RFTN1   | Raftlin                                                                                                                                             |
| 312 | P61586 | RHOA    | Transforming protein RhoA                                                                                                                           |
| 313 | Q13546 | RIPK1   | Receptor-interacting serine/threonine-protein kinase 1                                                                                              |
| 314 | Q13464 | ROCK1   | Rho-associated protein kinase 1                                                                                                                     |
| 315 | O75116 | ROCK2   | Rho-associated protein kinase 2                                                                                                                     |
| 316 | P27694 | RPA1    | Replication protein A 70 kDa DNA-binding subunit;Replication protein A 70 kDa DNA-binding subunit, N-terminally processed                           |
| 317 | P10301 | RRAS    | Ras-related protein R-Ras                                                                                                                           |
| 318 | P62070 | RRAS2   | Ras-related protein R-Ras2                                                                                                                          |
| 319 | P23921 | RRM1    | Ribonucleoside-diphosphate reductase large subunit                                                                                                  |
| 320 | Q9Y3I0 | RTCB    | tRNA-splicing ligase RtcB homolog                                                                                                                   |
| 321 | Q9NQC3 | RTN4    | Reticulon-4                                                                                                                                         |
| 322 | O95248 | SBF1    | Myotubularin-related protein 5                                                                                                                      |
| 323 | Q14160 | SCRIB   | Protein scribble homolog                                                                                                                            |
| 324 | O15027 | SEC16A  | Protein transport protein Sec16A                                                                                                                    |

|     |        |          |                                                            |
|-----|--------|----------|------------------------------------------------------------|
| 325 | Q9Y6Y8 | SEC23IP  | SEC23-interacting protein                                  |
| 326 | P53992 | SEC24C   | Protein transport protein Sec24C                           |
| 327 | P31947 | SFN      | 14-3-3 protein sigma                                       |
| 328 | Q86YV5 | SGK223   | Tyrosine-protein kinase Sgk223                             |
| 329 | Q9P0V3 | SH3BP4   | SH3 domain-binding protein 4                               |
| 330 | Q6UWI4 | SHISA2   | Protein shisa-2 homolog                                    |
| 331 | P78324 | SIRPA    | Tyrosine-protein phosphatase non-receptor type substrate 1 |
| 332 | Q8IX90 | SKA3     | Spindle and kinetochore-associated protein 3               |
| 333 | Q9P270 | SLAIN2   | SLAIN motif-containing protein 2                           |
| 334 | Q15796 | SMAD2    | Mothers against decapentaplegic homolog 2                  |
| 335 | O00161 | SNAP23   | Synaptosomal-associated protein 23                         |
| 336 | O95721 | SNAP29   | Synaptosomal-associated protein 29                         |
| 337 | Q13425 | SNTB2    | Beta-2-syntrophin                                          |
| 338 | Q9Y5X1 | SNX9     | Sorting nexin-9                                            |
| 339 | O94964 | SOGA1    | Protein SOGA1;N-terminal form;C-terminal 80 kDa form       |
| 340 | O60271 | SPAG9    | C-Jun-amino-terminal kinase-interacting protein 4          |
| 341 | Q5M775 | SPECC1   | Cytospin-B                                                 |
| 342 | Q69YQ0 | SPECC1L  | Cytospin-A                                                 |
| 343 | Q8N0X7 | SPG20    | Spartin                                                    |
| 344 | Q13813 | SPTAN1   | Spectrin alpha chain, non-erythrocytic 1                   |
| 345 | Q01082 | SPTBN1   | Spectrin beta chain, non-erythrocytic 1                    |
| 346 | Q13501 | SQSTM1   | Sequestosome-1                                             |
| 347 | O75044 | SRGAP2   | SLIT-ROBO Rho GTPase-activating protein 2                  |
| 348 | O60232 | SSSCA1   | Sjoegren syndrome/scleroderma autoantigen 1                |
| 349 | Q92783 | STAM     | Signal transducing adapter molecule 1                      |
| 350 | P40763 | STAT3    | Signal transducer and activator of transcription 3         |
| 351 | P31948 | STIP1    | Stress-induced-phosphoprotein 1                            |
| 352 | O94804 | STK10    | Serine/threonine-protein kinase 10                         |
| 353 | O94901 | SUN1     | SUN domain-containing protein 1                            |
| 354 | O95425 | SVIL     | Supervillin                                                |
| 355 | Q8WXH0 | SYNE2    | Nesprin-2                                                  |
| 356 | O15056 | SYNJ2    | Synaptojanin-2                                             |
| 357 | Q9NYJ8 | TAB2     | TGF-beta-activated kinase 1 and MAP3K7-binding protein 2   |
| 358 | O75410 | TACC1    | Transforming acidic coiled-coil-containing protein 1       |
| 359 | Q9Y6A5 | TACC3    | Transforming acidic coiled-coil-containing protein 3       |
| 360 | Q01995 | TAGLN    | Transgelin                                                 |
| 361 | Q9HCD6 | TANC2    | Protein TANC2                                              |
| 362 | Q8TC07 | TBC1D15  | TBC1 domain family member 15                               |
| 363 | Q9BYX2 | TBC1D2   | TBC1 domain family member 2A                               |
| 364 | Q99426 | TBCB     | Tubulin-folding cofactor B                                 |
| 365 | Q9UGI8 | TES      | Testin                                                     |
| 366 | Q9UDY2 | TJP2     | Tight junction protein ZO-2                                |
| 367 | P04183 | TK1      | Thymidine kinase, cytosolic                                |
| 368 | Q9Y4G6 | TLN2     | Talin-2                                                    |
| 369 | Q9NYL9 | TMOD3    | Tropomodulin-3                                             |
| 370 | Q9C0C2 | TNKS1BP1 | 182 kDa tankyrase-1-binding protein                        |
| 371 | Q92973 | TNPO1    | Transportin-1                                              |
| 372 | Q9HBL0 | TNS1     | Tensin-1                                                   |
| 373 | Q68CZ2 | TNS3     | Tensin-3                                                   |
| 374 | Q12888 | TP53BP1  | Tumor suppressor p53-binding protein 1                     |

|     |        |         |                                                                             |
|-----|--------|---------|-----------------------------------------------------------------------------|
| 375 | Q13625 | TP53BP2 | Apoptosis-stimulating of p53 protein 2                                      |
| 376 | P06753 | TPM3    | Tropomyosin alpha-3 chain                                                   |
| 377 | P13693 | TPT1    | Translationally-controlled tumor protein                                    |
| 378 | Q12933 | TRAF2   | TNF receptor-associated factor 2                                            |
| 379 | O75962 | TRIO    | Triple functional domain protein                                            |
| 380 | Q15654 | TRIP6   | Thyroid receptor-interacting protein 6                                      |
| 381 | Q99816 | TSG101  | Tumor susceptibility gene 101 protein                                       |
| 382 | Q99614 | TTC1    | Tetratricopeptide repeat protein 1                                          |
| 383 | P33981 | TTK     | Dual specificity protein kinase TTK                                         |
| 384 | Q9BSJ2 | TUBGCP2 | Gamma-tubulin complex component 2                                           |
| 385 | Q96CW5 | TUBGCP3 | Gamma-tubulin complex component 3                                           |
| 386 | Q5T6F2 | UBAP2   | Ubiquitin-associated protein 2                                              |
| 387 | Q14157 | UBAP2L  | Ubiquitin-associated protein 2-like                                         |
| 388 | Q9C0C9 | UBE2O   | E2/E3 hybrid ubiquitin-protein ligase UBE2O                                 |
| 389 | Q16851 | UGP2    | UTP--glucose-1-phosphate uridylyltransferase                                |
| 390 | P54578 | USP14   | Ubiquitin carboxyl-terminal hydrolase 14                                    |
| 391 | Q9UPU5 | USP24   | Ubiquitin carboxyl-terminal hydrolase 24                                    |
| 392 | P45974 | USP5    | Ubiquitin carboxyl-terminal hydrolase 5                                     |
| 393 | P46939 | UTRN    | Utrophin                                                                    |
| 394 | Q6EMK4 | VASN    | Vasorin                                                                     |
| 395 | P50552 | VASP    | Vasodilator-stimulated phosphoprotein                                       |
| 396 | P18206 | VCL     | Vinculin                                                                    |
| 397 | Q96QK1 | VPS35   | Vacuolar protein sorting-associated protein 35                              |
| 398 | O75351 | VPS4B   | Vacuolar protein sorting-associated protein 4B                              |
| 399 | Q9Y6W5 | WASF2   | Wiskott-Aldrich syndrome protein family member 2                            |
| 400 | O75083 | WDR1    | WD repeat-containing protein 1                                              |
| 401 | Q9H4A3 | WNK1    | Serine/threonine-protein kinase WNK1                                        |
| 402 | P31946 | YWHAB   | 14-3-3 protein beta/alpha;14-3-3 protein beta/alpha, N-terminally processed |
| 403 | P61981 | YWHAG   | 14-3-3 protein gamma;14-3-3 protein gamma, N-terminally processed           |
| 404 | Q9C0B5 | ZDHC5   | Palmitoyltransferase ZDHC5                                                  |
| 405 | O15231 | ZNF185  | Zinc finger protein 185                                                     |
| 406 | Q15942 | ZYX     | Zyxin                                                                       |

**Table S2. Proteins identified in PD-L1 proximity map involved in EGFR biology**

| #  | Uniprot | Gene name | Protein name                                                                                               |
|----|---------|-----------|------------------------------------------------------------------------------------------------------------|
| 1  | P00533  | EGFR      | Epidermal growth factor receptor                                                                           |
| 2  | P04626  | ERBB2     | Receptor tyrosine-protein kinase erbB-2                                                                    |
| 3  | P19174  | PLCG1     | 1-phosphatidylinositol 4,5-bisphosphate phosphodiesterase gamma-1                                          |
| 4  | P27708  | CAD       | CAD protein;Glutamine-dependent carbamoyl-phosphate synthase;Aspartate carbamoyltransferase;Dihydroorotase |
| 5  | Q05209  | PTPN12    | Tyrosine-protein phosphatase non-receptor type 12                                                          |
| 6  | Q06124  | PTPN11    | Tyrosine-protein phosphatase non-receptor type 11                                                          |
| 7  | Q9UQB8  | BAIAP2    | Brain-specific angiogenesis inhibitor 1-associated protein 2                                               |
| 8  | O14964  | HGS       | Hepatocyte growth factor-regulated tyrosine kinase substrate                                               |
| 9  | O75351  | VPS4B     | Vacuolar protein sorting-associated protein 4B                                                             |
| 10 | P53990  | IST1      | IST1 homolog                                                                                               |
| 11 | Q8WUM4  | PDCD6IP   | Programmed cell death 6-interacting protein                                                                |
| 12 | Q92783  | STAM      | Signal transducing adapter molecule 1                                                                      |
| 13 | Q99816  | TSG101    | Tumor susceptibility gene 101 protein                                                                      |

**Table S3. Proteins increased in H1650 with Durvalumab treatment**

| #  | Fasta headers                                                                                                                                  | Gene names |
|----|------------------------------------------------------------------------------------------------------------------------------------------------|------------|
| 1  | sp P49588 SYAC_HUMAN Alanine--tRNA ligase, cytoplasmic OS=Homo sapiens (Human) OX=9606 GN=AARS1 PE=1 SV=2                                      | AARS       |
| 2  | sp Q12979 ABR_HUMAN Active breakpoint cluster region-related protein OS=Homo sapiens (Human) OX=9606 GN=ABR PE=1 SV=2                          | ABR        |
| 3  | sp Q9H845 ACAD9_HUMAN Complex I assembly factor ACAD9, mitochondrial OS=Homo sapiens (Human) OX=9606 GN=ACAD9 PE=1 SV=1                        | ACAD9      |
| 4  | sp Q99798 ACON_HUMAN Aconitate hydratase, mitochondrial OS=Homo sapiens (Human) OX=9606 GN=ACO2 PE=1 SV=2                                      | ACO2       |
| 5  | sp Q9NPI3 ACO13_HUMAN Acyl-coenzyme A thioesterase 13 OS=Homo sapiens (Human) OX=9606 GN=ACOT13 PE=1 SV=1                                      | ACOT13     |
| 6  | sp Q9Y305 ACOT9_HUMAN Acyl-coenzyme A thioesterase 9, mitochondrial OS=Homo sapiens (Human) OX=9606 GN=ACOT9 PE=1 SV=2                         | ACOT9      |
| 7  | sp O15254 ACOX3_HUMAN Peroxisomal acyl-coenzyme A oxidase 3 OS=Homo sapiens (Human) OX=9606 GN=ACOX3 PE=1 SV=2                                 | ACOX3      |
| 8  | sp Q03154 ACY1_HUMAN Aminoacylase-1 OS=Homo sapiens (Human) OX=9606 GN=ACY1 PE=1 SV=1                                                          | ACY1       |
| 9  | sp O14672 ADA10_HUMAN Disintegrin and metalloproteinase domain-containing protein 10 OS=Homo sapiens (Human) OX=9606 GN=ADAM10 PE=1 SV=1       | ADAM10     |
| 10 | sp P55263 ADK_HUMAN Adenosine kinase OS=Homo sapiens (Human) OX=9606 GN=ADK PE=1 SV=2                                                          | ADK        |
| 11 | sp Q9H2P0 ADNP_HUMAN Activity-dependent neuroprotector homeobox protein OS=Homo sapiens (Human) OX=9606 GN=ADNP PE=1 SV=1                      | ADNP       |
| 12 | sp Q16186 ADRM1_HUMAN Proteasomal ubiquitin receptor ADRM1 OS=Homo sapiens (Human) OX=9606 GN=ADRM1 PE=1 SV=2                                  | ADRM1      |
| 13 | sp Q53H12 AGK_HUMAN Acylglycerol kinase, mitochondrial OS=Homo sapiens (Human) OX=9606 GN=AGK PE=1 SV=2                                        | AGK        |
| 14 | sp Q8IVF2 AHNAK2_HUMAN Protein AHNAK2 OS=Homo sapiens (Human) OX=9606 GN=AHNAK2 PE=1 SV=2                                                      | AHNAK2     |
| 15 | sp O95433 AHSA1_HUMAN Activator of 90 kDa heat shock protein ATPase homolog 1 OS=Homo sapiens (Human) OX=9606 GN=AHSA1 PE=1 SV=1               | AHSA1      |
| 16 | sp Q12904 AIMP1_HUMAN Aminoacyl tRNA synthase complex-interacting multifunctional protein 1 OS=Homo sapiens (Human) OX=9606 GN=AIMP1 PE=1 SV=2 | AIMP1      |
| 17 | sp Q13155 AIMP2_HUMAN Aminoacyl tRNA synthase complex-interacting multifunctional protein 2 OS=Homo sapiens (Human) OX=9606 GN=AIMP2 PE=1 SV=2 | AIMP2      |
| 18 | sp Q02952 AKA12_HUMAN A-kinase anchor protein 12 OS=Homo sapiens (Human) OX=9606 GN=AKAP12 PE=1 SV=4                                           | AKAP12     |
| 19 | sp P15121 ALDR_HUMAN Aldo-keto reductase family 1 member B1 OS=Homo sapiens (Human) OX=9606 GN=AKR1B1 PE=1 SV=3                                | AKR1B1     |
| 20 | sp P00352 AL1A1_HUMAN Retinal dehydrogenase 1 OS=Homo sapiens (Human) OX=9606 GN=ALDH1A1 PE=1 SV=2                                             | ALDH1A1    |
| 21 | sp Q9P2R3 ANFY1_HUMAN Rabankyrin-5 OS=Homo sapiens (Human) OX=9606 GN=ANKFY1 PE=1 SV=2                                                         | ANKFY1     |
| 22 | sp Q8IWX3 ANKH1_HUMAN Ankyrin repeat and KH domain-containing protein 1 OS=Homo sapiens (Human) OX=9606 GN=ANKHD1 PE=1 SV=1                    | ANKHD1     |
| 23 | sp O75179 ANR17_HUMAN Ankyrin repeat domain-containing protein 17 OS=Homo sapiens (Human) OX=9606 GN=ANKRD17 PE=1 SV=3                         | ANKRD17    |
| 24 | sp P15144 ANPN_HUMAN Aminopeptidase N OS=Homo sapiens (Human) OX=9606 GN=ANPEP PE=1 SV=4                                                       | ANPEP      |
| 25 | sp Q9BX55 AP1M1_HUMAN AP-1 complex subunit mu-1 OS=Homo sapiens (Human) OX=9606 GN=AP1M1 PE=1 SV=3                                             | AP1M1      |
| 26 | sp Q9HDC9 APMAP_HUMAN Adipocyte plasma membrane-associated protein OS=Homo sapiens (Human) OX=9606 GN=APMAP PE=1 SV=2                          | APMAP      |
| 27 | sp P05067 A4_HUMAN Amyloid-beta precursor protein OS=Homo sapiens (Human) OX=9606 GN=APP PE=1 SV=3                                             | APP        |
| 28 | sp P18085 ARF4_HUMAN ADP-ribosylation factor 4 OS=Homo sapiens (Human) OX=9606 GN=ARF4 PE=1 SV=3                                               | ARF4       |
| 29 | sp Q9Y6D6 BIG1_HUMAN Brefeldin A-inhibited guanine nucleotide-exchange protein 1 OS=Homo sapiens (Human) OX=9606 GN=ARFGEF1 PE=1 SV=2          | ARFGEF1    |
| 30 | sp P40616 ARL1_HUMAN ADP-ribosylation factor-like protein 1 OS=Homo sapiens (Human) OX=9606 GN=ARL1 PE=1 SV=1                                  | ARL1       |
| 31 | sp O15144 ARPC2_HUMAN Actin-related protein 2/3 complex subunit 2 OS=Homo sapiens (Human) OX=9606 GN=ARPC2 PE=1 SV=1                           | ARPC2      |
| 32 | sp P56211 ARP19_HUMAN cAMP-regulated phosphoprotein 19 OS=Homo sapiens (Human) OX=9606 GN=ARPP19 PE=1 SV=2                                     | ARPP19     |
| 33 | sp P04424 ARLY_HUMAN Argininosuccinate lyase OS=Homo sapiens (Human) OX=9606 GN=ASL PE=1 SV=4                                                  | ASL        |
| 34 | sp Q12797 ASPH_HUMAN Aspartyl/asparaginyl beta-hydroxylase OS=Homo sapiens (Human) OX=9606 GN=ASPH PE=1 SV=3                                   | ASPH       |
| 35 | sp Q9NT62 ATG3_HUMAN Ubiquitin-like-conjugating enzyme ATG3 OS=Homo sapiens (Human) OX=9606 GN=ATG3 PE=1 SV=1                                  | ATG3       |
| 36 | sp P31939 PUR9_HUMAN Bifunctional purine biosynthesis protein ATIC OS=Homo sapiens (Human) OX=9606 GN=ATIC PE=1 SV=3                           | ATIC       |
| 37 | sp P05026 AT1B1_HUMAN Sodium/potassium-transporting ATPase subunit beta-1 OS=Homo sapiens (Human) OX=9606 GN=ATP1B1 PE=1 SV=1                  | ATP1B1     |
| 38 | sp P36542 ATPG_HUMAN ATP synthase subunit gamma, mitochondrial OS=Homo sapiens (Human) OX=9606 GN=ATP5F1C PE=1 SV=1                            | ATP5C1     |



|    |                                                                                                                                              |          |
|----|----------------------------------------------------------------------------------------------------------------------------------------------|----------|
| 39 | sp P61421 VA0D1_HUMAN V-type proton ATPase subunit d 1 OS=Homo sapiens (Human) OX=9606 GN=ATP6VOD1 PE=1 SV=1                                 | ATP6VOD1 |
| 40 | sp Q96GX2 A7L3B_HUMAN Ataxin-7-like protein 3B OS=Homo sapiens (Human) OX=9606 GN=ATXN7L3B PE=1 SV=2                                         | ATXN7L3B |
| 41 | sp Q07812 BAX_HUMAN Apoptosis regulator BAX OS=Homo sapiens (Human) OX=9606 GN=BAX PE=1 SV=1                                                 | BAX      |
| 42 | sp P50895 BCAM_HUMAN Basal cell adhesion molecule OS=Homo sapiens (Human) OX=9606 GN=BCAM PE=1 SV=2                                          | BCAM     |
| 43 | sp O75934 SPF27_HUMAN Pre-mRNA-splicing factor SPF27 OS=Homo sapiens (Human) OX=9606 GN=BCAS2 PE=1 SV=1                                      | BCAS2    |
| 44 | sp Q14137 BOP1_HUMAN Ribosome biogenesis protein BOP1 OS=Homo sapiens (Human) OX=9606 GN=BOP1 PE=1 SV=2                                      | BOP1     |
| 45 | sp Q9Y6E2 BZW2_HUMAN Basic leucine zipper and W2 domain-containing protein 2 OS=Homo sapiens (Human) OX=9606 GN=BZW2 PE=1 SV=1               | BZW2     |
| 46 | sp Q9H0W9 CK054_HUMAN Ester hydrolase C11orf54 OS=Homo sapiens (Human) OX=9606 GN=C11orf54 PE=1 SV=1                                         | C11orf54 |
| 47 | sp Q99622 C10_HUMAN Protein C10 OS=Homo sapiens (Human) OX=9606 GN=C12orf57 PE=1 SV=1                                                        | C12orf57 |
| 48 | sp Q9NS00 C1GLT_HUMAN Glycoprotein-N-acetylgalactosamine 3-beta-galactosyltransferase 1 OS=Homo sapiens (Human) OX=9606 GN=C1GALT1 PE=1 SV=1 | C1GALT1  |
| 49 | sp A6NDU8 CE051_HUMAN UPF0600 protein C5orf51 OS=Homo sapiens (Human) OX=9606 GN=C5orf51 PE=1 SV=1                                           | C5orf51  |
| 50 | sp P27708 PYR1_HUMAN CAD protein OS=Homo sapiens (Human) OX=9606 GN=CAD PE=1 SV=3                                                            | CAD      |
| 51 | sp Q13555 KCC2G_HUMAN Calcium/calmodulin-dependent protein kinase type II subunit gamma OS=Homo sapiens (Human) OX=9606 GN=CAMK2G PE=1 SV=4  | CAMK2G   |
| 52 | sp P27824 CALX_HUMAN Calnexin OS=Homo sapiens (Human) OX=9606 GN=CANX PE=1 SV=2                                                              | CANX     |
| 53 | sp P07384 CAN1_HUMAN Calpain-1 catalytic subunit OS=Homo sapiens (Human) OX=9606 GN=CAPN1 PE=1 SV=1                                          | CAPN1    |
| 54 | sp P17655 CAN2_HUMAN Calpain-2 catalytic subunit OS=Homo sapiens (Human) OX=9606 GN=CAPN2 PE=1 SV=6                                          | CAPN2    |
| 55 | sp P04632 CPNS1_HUMAN Calpain small subunit 1 OS=Homo sapiens (Human) OX=9606 GN=CAPNS1 PE=1 SV=1                                            | CAPNS1   |
| 56 | sp P31944 CASPE_HUMAN Caspase-14 OS=Homo sapiens (Human) OX=9606 GN=CASP14 PE=1 SV=2                                                         | CASP14   |
| 57 | sp P49662 CASP4_HUMAN Caspase-4 OS=Homo sapiens (Human) OX=9606 GN=CASP4 PE=1 SV=1                                                           | CASP4    |
| 58 | sp Q13951 PEBB_HUMAN Core-binding factor subunit beta OS=Homo sapiens (Human) OX=9606 GN=CBFB PE=1 SV=2                                      | CBFB     |
| 59 | sp Q13185 CBX3_HUMAN Chromobox protein homolog 3 OS=Homo sapiens (Human) OX=9606 GN=CBX3 PE=1 SV=4                                           | CBX3     |
| 60 | sp P49368 TCPG_HUMAN T-complex protein 1 subunit gamma OS=Homo sapiens (Human) OX=9606 GN=CCT3 PE=1 SV=4                                     | CCT3     |
| 61 | sp P50990 TCPQ_HUMAN T-complex protein 1 subunit theta OS=Homo sapiens (Human) OX=9606 GN=CCT8 PE=1 SV=4                                     | CCT8     |
| 62 | sp P48509 CD151_HUMAN CD151 antigen OS=Homo sapiens (Human) OX=9606 GN=CD151 PE=1 SV=3                                                       | CD151    |
| 63 | sp P60033 CD81_HUMAN CD81 antigen OS=Homo sapiens (Human) OX=9606 GN=CD81 PE=1 SV=1                                                          | CD81     |
| 64 | sp P30260 CDC27_HUMAN Cell division cycle protein 27 homolog OS=Homo sapiens (Human) OX=9606 GN=CDC27 PE=1 SV=2                              | CDC27    |
| 65 | sp Q6DT37 MRCKG_HUMAN Serine/threonine-protein kinase MRCK gamma OS=Homo sapiens (Human) OX=9606 GN=CDC42BPG PE=1 SV=2                       | CDC42BPG |
| 66 | sp P12830 CADH1_HUMAN Cadherin-1 OS=Homo sapiens (Human) OX=9606 GN=CDH1 PE=1 SV=3                                                           | CDH1     |
| 67 | sp P50750 CDK9_HUMAN Cyclin-dependent kinase 9 OS=Homo sapiens (Human) OX=9606 GN=CDK9 PE=1 SV=3                                             | CDK9     |
| 68 | sp O95674 CDS2_HUMAN Phosphatidate cytidyltransferase 2 OS=Homo sapiens (Human) OX=9606 GN=CDS2 PE=1 SV=1                                    | CDS2     |
| 69 | sp Q92879 CELF1_HUMAN CUGBP Elav-like family member 1 OS=Homo sapiens (Human) OX=9606 GN=CELF1 PE=1 SV=2                                     | CELF1    |
| 70 | sp O00299 CLIC1_HUMAN Chloride intracellular channel protein 1 OS=Homo sapiens (Human) OX=9606 GN=CLIC1 PE=1 SV=4                            | CLIC1    |
| 71 | sp O95833 CLIC3_HUMAN Chloride intracellular channel protein 3 OS=Homo sapiens (Human) OX=9606 GN=CLIC3 PE=1 SV=2                            | CLIC3    |
| 72 | sp Q9Y696 CLIC4_HUMAN Chloride intracellular channel protein 4 OS=Homo sapiens (Human) OX=9606 GN=CLIC4 PE=1 SV=4                            | CLIC4    |
| 73 | sp P30622 CLIP1_HUMAN CAP-Gly domain-containing linker protein 1 OS=Homo sapiens (Human) OX=9606 GN=CLIP1 PE=1 SV=2                          | CLIP1    |
| 74 | sp Q00610 CLH1_HUMAN Clathrin heavy chain 1 OS=Homo sapiens (Human) OX=9606 GN=CLTC PE=1 SV=5                                                | CLTC     |
| 75 | sp Q96DG6 CMBL_HUMAN Carboxymethylglutaminyltransferase homolog OS=Homo sapiens (Human) OX=9606 GN=CMBL PE=1 SV=1                            | CMBL     |
| 76 | sp A5YKK6 CNOT1_HUMAN CCR4-NOT transcription complex subunit 1 OS=Homo sapiens (Human) OX=9606 GN=CNOT1 PE=1 SV=2                            | CNOT1    |
| 77 | sp Q5JTJ3 COA6_HUMAN Cytochrome c oxidase assembly factor 6 homolog OS=Homo sapiens (Human) OX=9606 GN=COA6 PE=1 SV=1                        | COA6     |
| 78 | sp Q8NB51 GT251_HUMAN Procollagen galactosyltransferase 1 OS=Homo sapiens (Human) OX=9606 GN=COLGALT1 PE=1 SV=1                              | COLGALT1 |
| 79 | sp P53618 COPB_HUMAN Coatamer subunit beta OS=Homo sapiens (Human) OX=9606 GN=COPB1 PE=1 SV=3                                                | COPB1    |
| 80 | sp Q9Y678 COPG1_HUMAN Coatamer subunit gamma-1 OS=Homo sapiens (Human) OX=9606 GN=COPG1 PE=1 SV=1                                            | COPG1    |
| 81 | sp Q9UNS2 CSN3_HUMAN COP9 signalosome complex subunit 3 OS=Homo sapiens (Human) OX=9606 GN=COPS3 PE=1 SV=3                                   | COPS3    |

|     |                                                                                                                                                                                 |         |
|-----|---------------------------------------------------------------------------------------------------------------------------------------------------------------------------------|---------|
| 82  | sp Q9H9Q2 CSN7B_HUMAN COP9 signalosome complex subunit 7b OS=Homo sapiens (Human) OX=9606 GN=COPS7B PE=1 SV=1                                                                   | COPS7B  |
| 83  | sp Q9ULV4 COR1C_HUMAN Coronin-1C OS=Homo sapiens (Human) OX=9606 GN=CORO1C PE=1 SV=1                                                                                            | CORO1C  |
| 84  | sp P14406 CX7A2_HUMAN Cytochrome c oxidase subunit 7A2, mitochondrial OS=Homo sapiens (Human) OX=9606 GN=COX7A2 PE=1 SV=1                                                       | COX7A2  |
| 85  | sp Q9UI42 CBPA4_HUMAN Carboxypeptidase A4 OS=Homo sapiens (Human) OX=9606 GN=CPA4 PE=1 SV=2                                                                                     | CPA4    |
| 86  | sp P36551 HEM6_HUMAN Oxygen-dependent coproporphyrinogen-III oxidase, mitochondrial OS=Homo sapiens (Human) OX=9606 GN=CPOX PE=1 SV=3                                           | CPOX    |
| 87  | sp P50416 CPT1A_HUMAN Carnitine O-palmitoyltransferase 1, liver isoform OS=Homo sapiens (Human) OX=9606 GN=CPT1A PE=1 SV=2                                                      | CPT1A   |
| 88  | sp P23786 CPT2_HUMAN Carnitine O-palmitoyltransferase 2, mitochondrial OS=Homo sapiens (Human) OX=9606 GN=CPT2 PE=1 SV=2                                                        | CPT2    |
| 89  | sp Q5TZA2 CROCC_HUMAN Rootletin OS=Homo sapiens (Human) OX=9606 GN=CROCC PE=1 SV=1                                                                                              | CROCC   |
| 90  | sp O75718 CRTAP_HUMAN Cartilage-associated protein OS=Homo sapiens (Human) OX=9606 GN=CRTAP PE=1 SV=1                                                                           | CRTAP   |
| 91  | sp Q08257 QOR_HUMAN Quinone oxidoreductase OS=Homo sapiens (Human) OX=9606 GN=CRYZ PE=1 SV=1                                                                                    | CRYZ    |
| 92  | sp P35222 CTNB1_HUMAN Catenin beta-1 OS=Homo sapiens (Human) OX=9606 GN=CTNNB1 PE=1 SV=1                                                                                        | CTNNB1  |
| 93  | sp P17812 PYRG1_HUMAN CTP synthase 1 OS=Homo sapiens (Human) OX=9606 GN=CTPS1 PE=1 SV=2                                                                                         | CTPS1   |
| 94  | sp Q69YN2 C19L1_HUMAN CWF19-like protein 1 OS=Homo sapiens (Human) OX=9606 GN=CWF19L1 PE=1 SV=2                                                                                 | CWF19L1 |
| 95  | sp P00387 NB5R3_HUMAN NADH-cytochrome b5 reductase 3 OS=Homo sapiens (Human) OX=9606 GN=CYB5R3 PE=1 SV=3                                                                        | CYB5R3  |
| 96  | sp Q7L576 CYFIP1_HUMAN Cytoplasmic FMR1-interacting protein 1 OS=Homo sapiens (Human) OX=9606 GN=CYFIP1 PE=1 SV=1                                                               | CYFIP1  |
| 97  | sp O00622 CCN1_HUMAN CCN family member 1 OS=Homo sapiens (Human) OX=9606 GN=CCN1 PE=1 SV=1                                                                                      | CYR61   |
| 98  | sp Q96G69 DCNL1_HUMAN DCN1-like protein 1 OS=Homo sapiens (Human) OX=9606 GN=DCUN1D1 PE=1 SV=1                                                                                  | DCUN1D1 |
| 99  | sp O95865 DDAH2_HUMAN N(G),N(G)-dimethylarginine dimethylaminohydrolase 2 OS=Homo sapiens (Human) OX=9606 GN=DDAH2 PE=1 SV=1                                                    | DDAH2   |
| 100 | sp Q16531 DDB1_HUMAN DNA damage-binding protein 1 OS=Homo sapiens (Human) OX=9606 GN=DDB1 PE=1 SV=1                                                                             | DDB1    |
| 101 | sp Q9NR30 DDX21_HUMAN Nucleolar RNA helicase 2 OS=Homo sapiens (Human) OX=9606 GN=DDX21 PE=1 SV=5                                                                               | DDX21   |
| 102 | sp Q13838 DX39B_HUMAN Spliceosome RNA helicase DDX39B OS=Homo sapiens (Human) OX=9606 GN=DDX39B PE=1 SV=1                                                                       | DDX39B  |
| 103 | sp P26196 DDX6_HUMAN Probable ATP-dependent RNA helicase DDX6 OS=Homo sapiens (Human) OX=9606 GN=DDX6 PE=1 SV=2                                                                 | DDX6    |
| 104 | sp Q16698 DECR_HUMAN 2,4-dienoyl-CoA reductase, mitochondrial OS=Homo sapiens (Human) OX=9606 GN=DECR1 PE=1 SV=1                                                                | DECR1   |
| 105 | sp P23743 DGKA_HUMAN Diacylglycerol kinase alpha OS=Homo sapiens (Human) OX=9606 GN=DGKA PE=1 SV=3                                                                              | DGKA    |
| 106 | sp P49366 DHYS_HUMAN Deoxyhypusine synthase OS=Homo sapiens (Human) OX=9606 GN=DHPS PE=1 SV=1                                                                                   | DHPS    |
| 107 | sp Q08211 DHX9_HUMAN ATP-dependent RNA helicase A OS=Homo sapiens (Human) OX=9606 GN=DHX9 PE=1 SV=4                                                                             | DHX9    |
| 108 | sp Q9P265 DIP2B_HUMAN Disco-interacting protein 2 homolog B OS=Homo sapiens (Human) OX=9606 GN=DIP2B PE=1 SV=3                                                                  | DIP2B   |
| 109 | sp P10515 ODP2_HUMAN Dihydrolipoyllysine-residue acetyltransferase component of pyruvate dehydrogenase complex, mitochondrial OS=Homo sapiens (Human) OX=9606 GN=DLAT PE=1 SV=3 | DLAT    |
| 110 | sp Q9Y2H0 DLGPA4_HUMAN Disks large-associated protein 4 OS=Homo sapiens (Human) OX=9606 GN=DLGAP4 PE=1 SV=3                                                                     | DLGAP4  |
| 111 | sp Q96EY1 DNAJA3_HUMAN DnaJ homolog subfamily A member 3, mitochondrial OS=Homo sapiens (Human) OX=9606 GN=DNAJA3 PE=1 SV=2                                                     | DNAJA3  |
| 112 | sp Q99543 DNJC2_HUMAN DnaJ homolog subfamily C member 2 OS=Homo sapiens (Human) OX=9606 GN=DNAJC2 PE=1 SV=4                                                                     | DNAJC2  |
| 113 | sp Q13217 DNJC3_HUMAN DnaJ homolog subfamily C member 3 OS=Homo sapiens (Human) OX=9606 GN=DNAJC3 PE=1 SV=1                                                                     | DNAJC3  |
| 114 | sp Q9P2X0 DPM3_HUMAN Dolichol-phosphate mannosyltransferase subunit 3 OS=Homo sapiens (Human) OX=9606 GN=DPM3 PE=1 SV=2                                                         | DPM3    |
| 115 | sp O14972 VP26C_HUMAN Vacuolar protein sorting-associated protein 26C OS=Homo sapiens (Human) OX=9606 GN=VPS26C PE=1 SV=1                                                       | DSCR3   |
| 116 | sp Q14204 DYHC1_HUMAN Cytoplasmic dynein 1 heavy chain 1 OS=Homo sapiens (Human) OX=9606 GN=DYNC1H1 PE=1 SV=5                                                                   | DYNC1H1 |
| 117 | sp Q6P2E9 EDC4_HUMAN Enhancer of mRNA-decapping protein 4 OS=Homo sapiens (Human) OX=9606 GN=EDC4 PE=1 SV=1                                                                     | EDC4    |
| 118 | sp Q05639 EF1A2_HUMAN Elongation factor 1-alpha 2 OS=Homo sapiens (Human) OX=9606 GN=EEF1A2 PE=1 SV=1                                                                           | EEF1A2  |
| 119 | sp P24534 EF1B_HUMAN Elongation factor 1-beta OS=Homo sapiens (Human) OX=9606 GN=EEF1B2 PE=1 SV=3                                                                               | EEF1B2  |
| 120 | sp Q96C19 EFHD2_HUMAN EF-hand domain-containing protein D2 OS=Homo sapiens (Human) OX=9606 GN=EFHD2 PE=1 SV=1                                                                   | EFHD2   |
| 121 | sp P00533 EGFR_HUMAN Epidermal growth factor receptor OS=Homo sapiens (Human) OX=9606 GN=EGFR PE=1 SV=2                                                                         | EGFR    |
| 122 | sp Q8NDI1 EHBP1_HUMAN EH domain-binding protein 1 OS=Homo sapiens (Human) OX=9606 GN=EHBP1 PE=1 SV=3                                                                            | EHBP1   |

|     |                                                                                                                                              |         |
|-----|----------------------------------------------------------------------------------------------------------------------------------------------|---------|
| 123 | sp Q9H4M9 EHD1_HUMAN EH domain-containing protein 1 OS=Homo sapiens (Human) OX=9606 GN=EHD1 PE=1 SV=2                                        | EHD1    |
| 124 | sp Q9NZN4 EHD2_HUMAN EH domain-containing protein 2 OS=Homo sapiens (Human) OX=9606 GN=EHD2 PE=1 SV=2                                        | EHD2    |
| 125 | sp Q9H223 EHD4_HUMAN EH domain-containing protein 4 OS=Homo sapiens (Human) OX=9606 GN=EHD4 PE=1 SV=1                                        | EHD4    |
| 126 | sp Q9BY44 EIF2A_HUMAN Eukaryotic translation initiation factor 2A OS=Homo sapiens (Human) OX=9606 GN=EIF2A PE=1 SV=3                         | EIF2A   |
| 127 | sp P19525 E2AK2_HUMAN Interferon-induced, double-stranded RNA-activated protein kinase OS=Homo sapiens (Human) OX=9606 GN=EIF2AK2 PE=1 SV=2  | EIF2AK2 |
| 128 | sp P55884 EIF3B_HUMAN Eukaryotic translation initiation factor 3 subunit B OS=Homo sapiens (Human) OX=9606 GN=EIF3B PE=1 SV=3                | EIF3B   |
| 129 | sp P60228 EIF3E_HUMAN Eukaryotic translation initiation factor 3 subunit E OS=Homo sapiens (Human) OX=9606 GN=EIF3E PE=1 SV=1                | EIF3E   |
| 130 | sp O75822 EIF3J_HUMAN Eukaryotic translation initiation factor 3 subunit J OS=Homo sapiens (Human) OX=9606 GN=EIF3J PE=1 SV=2                | EIF3J   |
| 131 | sp Q14240 IF4A2_HUMAN Eukaryotic initiation factor 4A-II OS=Homo sapiens (Human) OX=9606 GN=EIF4A2 PE=1 SV=2                                 | EIF4A2  |
| 132 | sp Q04637 IF4G1_HUMAN Eukaryotic translation initiation factor 4 gamma 1 OS=Homo sapiens (Human) OX=9606 GN=EIF4G1 PE=1 SV=4                 | EIF4G1  |
| 133 | sp Q9H4G0 E41L1_HUMAN Band 4.1-like protein 1 OS=Homo sapiens (Human) OX=9606 GN=EPB41L1 PE=1 SV=2                                           | EPB41L1 |
| 134 | sp Q9H653 ES8L2_HUMAN Epidermal growth factor receptor kinase substrate 8-like protein 2 OS=Homo sapiens (Human) OX=9606 GN=EPS8L2 PE=1 SV=2 | EPS8L2  |
| 135 | sp Q9NZ08 ERAP1_HUMAN Endoplasmic reticulum aminopeptidase 1 OS=Homo sapiens (Human) OX=9606 GN=ERAP1 PE=1 SV=3                              | ERAP1   |
| 136 | sp Q96HE7 ERO1A_HUMAN ERO1-like protein alpha OS=Homo sapiens (Human) OX=9606 GN=ERO1A PE=1 SV=2                                             | ERO1L   |
| 137 | sp Q9H098 F107B_HUMAN Protein FAM107B OS=Homo sapiens (Human) OX=9606 GN=FAM107B PE=1 SV=1                                                   | FAM107B |
| 138 | sp Q8NC44 RETR2_HUMAN Reticulophagy regulator 2 OS=Homo sapiens (Human) OX=9606 GN=RETREG2 PE=1 SV=3                                         | FAM134A |
| 139 | sp Q96C01 F136A_HUMAN Protein FAM136A OS=Homo sapiens (Human) OX=9606 GN=FAM136A PE=1 SV=1                                                   | FAM136A |
| 140 | sp Q9BRX8 PXL2A_HUMAN Peroxiredoxin-like 2A OS=Homo sapiens (Human) OX=9606 GN=PRXL2A PE=1 SV=3                                              | FAM213A |
| 141 | sp Q9NUQ9 CYRIB_HUMAN CYFIP-related Rac1 interactor B OS=Homo sapiens (Human) OX=9606 GN=CYRIB PE=1 SV=1                                     | FAM49B  |
| 142 | sp O95684 CEP43_HUMAN Centrosomal protein 43 OS=Homo sapiens (Human) OX=9606 GN=CEP43 PE=1 SV=1                                              | FGFR1OP |
| 143 | sp P07954 FUMH_HUMAN Fumarate hydratase, mitochondrial OS=Homo sapiens (Human) OX=9606 GN=FH PE=1 SV=3                                       | FH      |
| 144 | sp Q96AY3 FKBP10_HUMAN Peptidyl-prolyl cis-trans isomerase FKBP10 OS=Homo sapiens (Human) OX=9606 GN=FKBP10 PE=1 SV=1                        | FKBP10  |
| 145 | sp Q5TON5 FBNP1L_HUMAN Formin-binding protein 1-like OS=Homo sapiens (Human) OX=9606 GN=FBNP1L PE=1 SV=3                                     | FBNP1L  |
| 146 | sp Q53EP0 FNDC3B_HUMAN Fibronectin type III domain-containing protein 3B OS=Homo sapiens (Human) OX=9606 GN=FNDC3B PE=1 SV=2                 | FNDC3B  |
| 147 | sp Q9C0B1 FTO_HUMAN Alpha-ketoglutarate-dependent dioxygenase FTO OS=Homo sapiens (Human) OX=9606 GN=FTO PE=1 SV=3                           | FTO     |
| 148 | sp Q8IY81 SPB1_HUMAN pre-rRNA 2-O-ribose RNA methyltransferase FTSJ3 OS=Homo sapiens (Human) OX=9606 GN=FTSJ3 PE=1 SV=2                      | FTSJ3   |
| 149 | sp Q96I24 FUBP3_HUMAN Far upstream element-binding protein 3 OS=Homo sapiens (Human) OX=9606 GN=FUBP3 PE=1 SV=2                              | FUBP3   |
| 150 | sp P51114 FXR1_HUMAN Fragile X mental retardation syndrome-related protein 1 OS=Homo sapiens (Human) OX=9606 GN=FXR1 PE=1 SV=3               | FXR1    |
| 151 | sp Q9UN86 G3BP2_HUMAN Ras GTPase-activating protein-binding protein 2 OS=Homo sapiens (Human) OX=9606 GN=G3BP2 PE=1 SV=2                     | G3BP2   |
| 152 | sp P10253 LYAG_HUMAN Lysosomal alpha-glucosidase OS=Homo sapiens (Human) OX=9606 GN=GAA PE=1 SV=4                                            | GAA     |
| 153 | sp Q14376 GALE_HUMAN UDP-glucose 4-epimerase OS=Homo sapiens (Human) OX=9606 GN=GALE PE=1 SV=2                                               | GALE    |
| 154 | sp Q86SF2 GALT7_HUMAN N-acetylgalactosaminyltransferase 7 OS=Homo sapiens (Human) OX=9606 GN=GALNT7 PE=1 SV=1                                | GALNT7  |
| 155 | sp P22102 PUR2_HUMAN Trifunctional purine biosynthetic protein adenosine-3 OS=Homo sapiens (Human) OX=9606 GN=GART PE=1 SV=1                 | GART    |
| 156 | sp P48507 GSH0_HUMAN Glutamate--cysteine ligase regulatory subunit OS=Homo sapiens (Human) OX=9606 GN=GCLM PE=1 SV=1                         | GCLM    |
| 157 | sp Q8TEQ6 GEM5_HUMAN Gem-associated protein 5 OS=Homo sapiens (Human) OX=9606 GN=GEMIN5 PE=1 SV=3                                            | GEMIN5  |
| 158 | sp Q06210 GFPT1_HUMAN Glutamine--fructose-6-phosphate aminotransferase [isomerizing] 1 OS=Homo sapiens (Human) OX=9606 GN=GFPT1 PE=1 SV=3    | GFPT1   |
| 159 | sp Q9UJY5 GGA1_HUMAN ADP-ribosylation factor-binding protein GGA1 OS=Homo sapiens (Human) OX=9606 GN=GGA1 PE=1 SV=1                          | GGA1    |
| 160 | sp P49915 GUAA_HUMAN GMP synthase [glutamine-hydrolyzing] OS=Homo sapiens (Human) OX=9606 GN=GMPS PE=1 SV=1                                  | GMPS    |
| 161 | sp Q14344 GNA13_HUMAN Guanine nucleotide-binding protein subunit alpha-13 OS=Homo sapiens (Human) OX=9606 GN=GNA13 PE=1 SV=2                 | GNA13   |

|     |                                                                                                                                         |         |
|-----|-----------------------------------------------------------------------------------------------------------------------------------------|---------|
| 162 | sp P04899 GNAI2_HUMAN Guanine nucleotide-binding protein G(i) subunit alpha-2 OS=Homo sapiens (Human) OX=9606 GN=GNAI2 PE=1 SV=3        | GNAI2   |
| 163 | sp P62873 GBB1_HUMAN Guanine nucleotide-binding protein G(I)/G(S)/G(T) subunit beta-1 OS=Homo sapiens (Human) OX=9606 GN=GNB1 PE=1 SV=3 | GNB1    |
| 164 | sp P63244 RACK1_HUMAN Receptor of activated protein C kinase 1 OS=Homo sapiens (Human) OX=9606 GN=RACK1 PE=1 SV=3                       | GNB2L1  |
| 165 | sp P46926 GNP1_HUMAN Glucosamine-6-phosphate isomerase 1 OS=Homo sapiens (Human) OX=9606 GN=GNPDA1 PE=1 SV=1                            | GNPDA1  |
| 166 | sp P17174 AATC_HUMAN Aspartate aminotransferase, cytoplasmic OS=Homo sapiens (Human) OX=9606 GN=GOT1 PE=1 SV=3                          | GOT1    |
| 167 | sp P00505 AATM_HUMAN Aspartate aminotransferase, mitochondrial OS=Homo sapiens (Human) OX=9606 GN=GOT2 PE=1 SV=3                        | GOT2    |
| 168 | sp Q13098 CSN1_HUMAN COP9 signalosome complex subunit 1 OS=Homo sapiens (Human) OX=9606 GN=GPS1 PE=1 SV=4                               | GPS1    |
| 169 | sp Q12849 GRSF1_HUMAN G-rich sequence factor 1 OS=Homo sapiens (Human) OX=9606 GN=GRSF1 PE=1 SV=3                                       | GRSF1   |
| 170 | sp P48637 GSHB_HUMAN Glutathione synthetase OS=Homo sapiens (Human) OX=9606 GN=GSS PE=1 SV=1                                            | GSS     |
| 171 | sp P52655 TF2AA_HUMAN Transcription initiation factor IIA subunit 1 OS=Homo sapiens (Human) OX=9606 GN=GTF2A1 PE=1 SV=1                 | GTF2A1  |
| 172 | sp Q9Y5Q8 TF3C5_HUMAN General transcription factor 3C polypeptide 5 OS=Homo sapiens (Human) OX=9606 GN=GTF3C5 PE=1 SV=2                 | GTF3C5  |
| 173 | sp P13807 GYS1_HUMAN Glycogen [starch] synthase, muscle OS=Homo sapiens (Human) OX=9606 GN=GYS1 PE=1 SV=2                               | GYS1    |
| 174 | sp P07686 HEXB_HUMAN Beta-hexosaminidase subunit beta OS=Homo sapiens (Human) OX=9606 GN=HEXB PE=1 SV=3                                 | HEXB    |
| 175 | sp Q6NVY1 HIBCH_HUMAN 3-hydroxyisobutyryl-CoA hydrolase, mitochondrial OS=Homo sapiens (Human) OX=9606 GN=HIBCH PE=1 SV=2               | HIBCH   |
| 176 | sp P19367 HKK1_HUMAN Hexokinase-1 OS=Homo sapiens (Human) OX=9606 GN=HK1 PE=1 SV=3                                                      | HK1     |
| 177 | sp P52789 HKK2_HUMAN Hexokinase-2 OS=Homo sapiens (Human) OX=9606 GN=HK2 PE=1 SV=2                                                      | HK2     |
| 178 | sp P10321 HLAC_HUMAN HLA class I histocompatibility antigen, C alpha chain OS=Homo sapiens (Human) OX=9606 GN=HLA-C PE=1 SV=3           | HLA-C   |
| 179 | sp Q01581 HMGCS1_HUMAN Hydroxymethylglutaryl-CoA synthase, cytoplasmic OS=Homo sapiens (Human) OX=9606 GN=HMGCS1 PE=1 SV=2              | HMGCS1  |
| 180 | sp P51991 ROA3_HUMAN Heterogeneous nuclear ribonucleoprotein A3 OS=Homo sapiens (Human) OX=9606 GN=HNRNPA3 PE=1 SV=2                    | HNRNPA3 |
| 181 | sp P55795 HNRH2_HUMAN Heterogeneous nuclear ribonucleoprotein H2 OS=Homo sapiens (Human) OX=9606 GN=HNRNPH2 PE=1 SV=1                   | HNRNPH2 |
| 182 | sp P61978 HNRPK_HUMAN Heterogeneous nuclear ribonucleoprotein K OS=Homo sapiens (Human) OX=9606 GN=HNRNPK PE=1 SV=1                     | HNRNPK  |
| 183 | sp P00492 HPRT_HUMAN Hypoxanthine-guanine phosphoribosyltransferase OS=Homo sapiens (Human) OX=9606 GN=HPRT1 PE=1 SV=2                  | HPRT1   |
| 184 | sp P34932 HSP74_HUMAN Heat shock 70 kDa protein 4 OS=Homo sapiens (Human) OX=9606 GN=HSPA4 PE=1 SV=4                                    | HSPA4   |
| 185 | sp Q92598 HS105_HUMAN Heat shock protein 105 kDa OS=Homo sapiens (Human) OX=9606 GN=HSPH1 PE=1 SV=1                                     | HSPH1   |
| 186 | sp P41252 SYIC_HUMAN Isoleucine--tRNA ligase, cytoplasmic OS=Homo sapiens (Human) OX=9606 GN=IARS1 PE=1 SV=2                            | IARS    |
| 187 | sp P05362 ICAM1_HUMAN Intercellular adhesion molecule 1 OS=Homo sapiens (Human) OX=9606 GN=ICAM1 PE=1 SV=2                              | ICAM1   |
| 188 | sp Q16666 IFI16_HUMAN Gamma-interferon-inducible protein 16 OS=Homo sapiens (Human) OX=9606 GN=IFI16 PE=1 SV=3                          | IFI16   |
| 189 | sp P09914 IFIT1_HUMAN Interferon-induced protein with tetratricopeptide repeats 1 OS=Homo sapiens (Human) OX=9606 GN=IFIT1 PE=1 SV=2    | IFIT1   |
| 190 | sp P09913 IFIT2_HUMAN Interferon-induced protein with tetratricopeptide repeats 2 OS=Homo sapiens (Human) OX=9606 GN=IFIT2 PE=1 SV=1    | IFIT2   |
| 191 | sp O14879 IFIT3_HUMAN Interferon-induced protein with tetratricopeptide repeats 3 OS=Homo sapiens (Human) OX=9606 GN=IFIT3 PE=1 SV=1    | IFIT3   |
| 192 | sp Q12906 ILF3_HUMAN Interleukin enhancer-binding factor 3 OS=Homo sapiens (Human) OX=9606 GN=ILF3 PE=1 SV=3                            | ILF3    |
| 193 | sp Q13418 ILK_HUMAN Integrin-linked protein kinase OS=Homo sapiens (Human) OX=9606 GN=ILK PE=1 SV=2                                     | ILK     |
| 194 | sp Q9NX62 IMPA3_HUMAN Golgi-resident adenosine 3,5-bisphosphate 3-phosphatase OS=Homo sapiens (Human) OX=9606 GN=BPNT2 PE=1 SV=1        | IMPAD1  |
| 195 | sp P46940 IQGA1_HUMAN Ras GTPase-activating-like protein IQGAP1 OS=Homo sapiens (Human) OX=9606 GN=IQGAP1 PE=1 SV=1                     | IQGAP1  |
| 196 | sp Q8WZA9 IRGQ_HUMAN Immunity-related GTPase family Q protein OS=Homo sapiens (Human) OX=9606 GN=IRGQ PE=1 SV=1                         | IRGQ    |
| 197 | sp P08648 ITA5_HUMAN Integrin alpha-5 OS=Homo sapiens (Human) OX=9606 GN=ITGA5 PE=1 SV=2                                                | ITGA5   |
| 198 | sp P23229 ITA6_HUMAN Integrin alpha-6 OS=Homo sapiens (Human) OX=9606 GN=ITGA6 PE=1 SV=5                                                | ITGA6   |
| 199 | sp P16144 ITB4_HUMAN Integrin beta-4 OS=Homo sapiens (Human) OX=9606 GN=ITGB4 PE=1 SV=5                                                 | ITGB4   |
| 200 | sp Q8N5M9 JAGN1_HUMAN Protein jagunal homolog 1 OS=Homo sapiens (Human) OX=9606 GN=JAGN1 PE=1 SV=1                                      | JAGN1   |

|     |                                                                                                                                          |          |
|-----|------------------------------------------------------------------------------------------------------------------------------------------|----------|
| 201 | sp Q6NYC1 JMJD6_HUMAN Bifunctional arginine demethylase and lysyl-hydroxylase JMJD6 OS=Homo sapiens (Human) OX=9606 GN=JMJD6 PE=1 SV=1   | JMJD6    |
| 202 | sp Q9P0J7 KCMF1_HUMAN E3 ubiquitin-protein ligase KCMF1 OS=Homo sapiens (Human) OX=9606 GN=KCMF1 PE=1 SV=2                               | KCMF1    |
| 203 | sp Q9P260 RELCH_HUMAN RAB11-binding protein RELCH OS=Homo sapiens (Human) OX=9606 GN=RELCH PE=1 SV=2                                     | KIAA1468 |
| 204 | sp Q07866 KLC1_HUMAN Kinesin light chain 1 OS=Homo sapiens (Human) OX=9606 GN=KLC1 PE=1 SV=2                                             | KLC1     |
| 205 | sp P52292 IMA1_HUMAN Importin subunit alpha-1 OS=Homo sapiens (Human) OX=9606 GN=KPNA2 PE=1 SV=1                                         | KPNA2    |
| 206 | sp Q14974 IMB1_HUMAN Importin subunit beta-1 OS=Homo sapiens (Human) OX=9606 GN=KPNB1 PE=1 SV=2                                          | KPNB1    |
| 207 | sp P13473 LAMP2_HUMAN Lysosome-associated membrane glycoprotein 2 OS=Homo sapiens (Human) OX=9606 GN=LAMP2 PE=1 SV=2                     | LAMP2    |
| 208 | sp Q6IAA8 LTOR1_HUMAN Ragulator complex protein LAMTOR1 OS=Homo sapiens (Human) OX=9606 GN=LAMTOR1 PE=1 SV=2                             | LAMTOR1  |
| 209 | sp P18858 DNL1_HUMAN DNA ligase 1 OS=Homo sapiens (Human) OX=9606 GN=LIG1 PE=1 SV=1                                                      | LIG1     |
| 210 | sp P48059 LIMS1_HUMAN LIM and senescent cell antigen-like-containing domain protein 1 OS=Homo sapiens (Human) OX=9606 GN=LIMS1 PE=1 SV=4 | LIMS1    |
| 211 | sp Q12907 LMAN2_HUMAN Vesicular integral-membrane protein VIP36 OS=Homo sapiens (Human) OX=9606 GN=LMAN2 PE=1 SV=1                       | LMAN2    |
| 212 | sp Q8NF37 PCAT1_HUMAN Lysophosphatidylcholine acyltransferase 1 OS=Homo sapiens (Human) OX=9606 GN=LPCAT1 PE=1 SV=2                      | LPCAT1   |
| 213 | sp Q6P1A2 MBOA5_HUMAN Lysophospholipid acyltransferase 5 OS=Homo sapiens (Human) OX=9606 GN=LPCAT3 PE=1 SV=1                             | LPCAT3   |
| 214 | sp Q9BQK8 LPIN3_HUMAN Phosphatidate phosphatase LPIN3 OS=Homo sapiens (Human) OX=9606 GN=LPIN3 PE=1 SV=3                                 | LPIN3    |
| 215 | sp P50851 LRBA_HUMAN Lipopolysaccharide-responsive and beige-like anchor protein OS=Homo sapiens (Human) OX=9606 GN=LRBA PE=1 SV=4       | LRBA     |
| 216 | sp P42704 LRPPRC_HUMAN Leucine-rich PPR motif-containing protein, mitochondrial OS=Homo sapiens (Human) OX=9606 GN=LRPPRC PE=1 SV=3      | LRPPRC   |
| 217 | sp Q9H0U3 MAGT1_HUMAN Magnesium transporter protein 1 OS=Homo sapiens (Human) OX=9606 GN=MAGT1 PE=1 SV=1                                 | MAGT1    |
| 218 | sp O43318 MAP3K7_HUMAN Mitogen-activated protein kinase kinase 7 OS=Homo sapiens (Human) OX=9606 GN=MAP3K7 PE=1 SV=1                     | MAP3K7   |
| 219 | sp P43121 MUC18_HUMAN Cell surface glycoprotein MUC18 OS=Homo sapiens (Human) OX=9606 GN=MCAM PE=1 SV=2                                  | MCAM     |
| 220 | sp Q8NI22 MCFD2_HUMAN Multiple coagulation factor deficiency protein 2 OS=Homo sapiens (Human) OX=9606 GN=MCFD2 PE=1 SV=1                | MCFD2    |
| 221 | sp P50579 MAP2_HUMAN Methionine aminopeptidase 2 OS=Homo sapiens (Human) OX=9606 GN=METAP2 PE=1 SV=1                                     | METAP2   |
| 222 | sp Q9UNW1 MINP1_HUMAN Multiple inositol polyphosphate phosphatase 1 OS=Homo sapiens (Human) OX=9606 GN=MINPP1 PE=1 SV=1                  | MINPP1   |
| 223 | sp Q14165 MLEC_HUMAN Malectin OS=Homo sapiens (Human) OX=9606 GN=MLEC PE=1 SV=1                                                          | MLEC     |
| 224 | sp P08473 NEP_HUMAN Neprilysin OS=Homo sapiens (Human) OX=9606 GN=MME PE=1 SV=2                                                          | MME      |
| 225 | sp O96007 MOC2B_HUMAN Molybdopterin synthase catalytic subunit OS=Homo sapiens (Human) OX=9606 GN=MOCS2 PE=1 SV=1                        | MOCS2    |
| 226 | sp Q9HCE1 MOV10_HUMAN Helicase MOV-10 OS=Homo sapiens (Human) OX=9606 GN=MOV10 PE=1 SV=2                                                 | MOV10    |
| 227 | sp O75352 MPDU1_HUMAN Mannose-P-dolichol utilization defect 1 protein OS=Homo sapiens (Human) OX=9606 GN=MPDU1 PE=1 SV=2                 | MPDU1    |
| 228 | sp Q8N3R9 MPP5_HUMAN MAGUK p55 subfamily member 5 OS=Homo sapiens (Human) OX=9606 GN=MPP5 PE=1 SV=3                                      | MPP5     |
| 229 | sp Q9NWU5 MRPL22_HUMAN 39S ribosomal protein L22, mitochondrial OS=Homo sapiens (Human) OX=9606 GN=MRPL22 PE=1 SV=1                      | MRPL22   |
| 230 | sp Q9BZE1 MRPL37_HUMAN 39S ribosomal protein L37, mitochondrial OS=Homo sapiens (Human) OX=9606 GN=MRPL37 PE=1 SV=2                      | MRPL37   |
| 231 | sp Q9Y676 MRPS18B_HUMAN 28S ribosomal protein S18b, mitochondrial OS=Homo sapiens (Human) OX=9606 GN=MRPS18B PE=1 SV=1                   | MRPS18B  |
| 232 | sp P82673 MRPS35_HUMAN 28S ribosomal protein S35, mitochondrial OS=Homo sapiens (Human) OX=9606 GN=MRPS35 PE=1 SV=1                      | MRPS35   |
| 233 | sp P00403 MT-CO2_HUMAN Cytochrome c oxidase subunit 2 OS=Homo sapiens (Human) OX=9606 GN=MT-CO2 PE=1 SV=1                                | MT-CO2   |
| 234 | sp O94776 MTA2_HUMAN Metastasis-associated protein MTA2 OS=Homo sapiens (Human) OX=9606 GN=MTA2 PE=1 SV=1                                | MTA2     |
| 235 | sp P42345 MTOR_HUMAN Serine/threonine-protein kinase mTOR OS=Homo sapiens (Human) OX=9606 GN=MTOR PE=1 SV=1                              | MTOR     |
| 236 | sp Q14764 MVP_HUMAN Major vault protein OS=Homo sapiens (Human) OX=9606 GN=MVP PE=1 SV=4                                                 | MVP      |
| 237 | sp P20591 MX1_HUMAN Interferon-induced GTP-binding protein Mx1 OS=Homo sapiens (Human) OX=9606 GN=MX1 PE=1 SV=4                          | MX1      |
| 238 | sp Q96597 MYADM_HUMAN Myeloid-associated differentiation marker OS=Homo sapiens (Human) OX=9606 GN=MYADM PE=1 SV=2                       | MYADM    |
| 239 | sp Q7Z406 MYH14_HUMAN Myosin-14 OS=Homo sapiens (Human) OX=9606 GN=MYH14 PE=1 SV=2                                                       | MYH14    |

|     |                                                                                                                                                                                                                         |               |
|-----|-------------------------------------------------------------------------------------------------------------------------------------------------------------------------------------------------------------------------|---------------|
| 240 | sp P05976 MYL1_HUMAN Myosin light chain 1/3, skeletal muscle isoform OS=Homo sapiens (Human) OX=9606 GN=MYL1 PE=1 SV=3;sp P08590 MYL3_HUMAN Myosin light chain 3 OS=Homo sapiens (Human) OX=9606 GN=MYL3 PE=1 SV=3      | MYL1;MYL3     |
| 241 | sp P19105 ML12A_HUMAN Myosin regulatory light chain 12A OS=Homo sapiens (Human) OX=9606 GN=MYL12A PE=1 SV=2;sp O14950 ML12B_HUMAN Myosin regulatory light chain 12B OS=Homo sapiens (Human) OX=9606 GN=MYL12B PE=1 SV=2 | MYL12A;MYL12B |
| 242 | sp O43795 MYO1B_HUMAN Unconventional myosin-1b OS=Homo sapiens (Human) OX=9606 GN=MYO1B PE=1 SV=3                                                                                                                       | MYO1B         |
| 243 | sp O00159 MYO1C_HUMAN Unconventional myosin-1c OS=Homo sapiens (Human) OX=9606 GN=MYO1C PE=1 SV=4                                                                                                                       | MYO1C         |
| 244 | sp Q13564 ULA1_HUMAN NEDD8-activating enzyme E1 regulatory subunit OS=Homo sapiens (Human) OX=9606 GN=NAE1 PE=1 SV=1                                                                                                    | NAE1          |
| 245 | sp P43490 NAMPT_HUMAN Nicotinamide phosphoribosyltransferase OS=Homo sapiens (Human) OX=9606 GN=NAMPT PE=1 SV=1                                                                                                         | NAMPT         |
| 246 | sp P54920 SNAA_HUMAN Alpha-soluble NSF attachment protein OS=Homo sapiens (Human) OX=9606 GN=NAPA PE=1 SV=3                                                                                                             | NAPA          |
| 247 | sp O43776 SYNC_HUMAN Asparagine--tRNA ligase, cytoplasmic OS=Homo sapiens (Human) OX=9606 GN=NARS1 PE=1 SV=1                                                                                                            | NARS          |
| 248 | sp Q09161 NCBP1_HUMAN Nuclear cap-binding protein subunit 1 OS=Homo sapiens (Human) OX=9606 GN=NCBP1 PE=1 SV=1                                                                                                          | NCBP1         |
| 249 | sp Q6ZVX7 FBX50_HUMAN F-box only protein 50 OS=Homo sapiens (Human) OX=9606 GN=NCCRP1 PE=1 SV=1                                                                                                                         | NCCRP1        |
| 250 | sp Q6PIU2 NCEH1_HUMAN Neutral cholesterol ester hydrolase 1 OS=Homo sapiens (Human) OX=9606 GN=NCEH1 PE=1 SV=3                                                                                                          | NCEH1         |
| 251 | sp Q9P0J0 NDUAD_HUMAN NADH dehydrogenase [ubiquinone] 1 alpha subcomplex subunit 13 OS=Homo sapiens (Human) OX=9606 GN=NDUFA13 PE=1 SV=3                                                                                | NDUFA13       |
| 252 | sp Q9P032 NDUF4_HUMAN NADH dehydrogenase [ubiquinone] 1 alpha subcomplex assembly factor 4 OS=Homo sapiens (Human) OX=9606 GN=NDUFAF4 PE=1 SV=1                                                                         | NDUFAF4       |
| 253 | sp O75438 NDUB1_HUMAN NADH dehydrogenase [ubiquinone] 1 beta subcomplex subunit 1 OS=Homo sapiens (Human) OX=9606 GN=NDUFB1 PE=1 SV=1                                                                                   | NDUFB1        |
| 254 | sp P28331 NDUS1_HUMAN NADH-ubiquinone oxidoreductase 75 kDa subunit, mitochondrial OS=Homo sapiens (Human) OX=9606 GN=NDUFS1 PE=1 SV=3                                                                                  | NDUFS1        |
| 255 | sp Q9NVZ3 NECP2_HUMAN Adaptin ear-binding coat-associated protein 2 OS=Homo sapiens (Human) OX=9606 GN=NECAP2 PE=1 SV=1                                                                                                 | NECAP2        |
| 256 | sp Q96PU5 NED4L_HUMAN E3 ubiquitin-protein ligase NEDD4-like OS=Homo sapiens (Human) OX=9606 GN=NEDD4L PE=1 SV=2                                                                                                        | NEDD4L        |
| 257 | sp O60524 NEMF_HUMAN Nuclear export mediator factor NEMF OS=Homo sapiens (Human) OX=9606 GN=NEMF PE=1 SV=4                                                                                                              | NEMF          |
| 258 | sp Q9BYT8 NEUL_HUMAN Neurolysin, mitochondrial OS=Homo sapiens (Human) OX=9606 GN=NLN PE=1 SV=1                                                                                                                         | NLN           |
| 259 | sp P15531 NDKA_HUMAN Nucleoside diphosphate kinase A OS=Homo sapiens (Human) OX=9606 GN=NME1 PE=1 SV=1                                                                                                                  | NME1          |
| 260 | sp Q13423 NNTM_HUMAN NAD(P) transhydrogenase, mitochondrial OS=Homo sapiens (Human) OX=9606 GN=NNT PE=1 SV=3                                                                                                            | NNT           |
| 261 | sp Q9H6R4 NOL6_HUMAN Nucleolar protein 6 OS=Homo sapiens (Human) OX=9606 GN=NOL6 PE=1 SV=2                                                                                                                              | NOL6          |
| 262 | sp Q8NDH3 PEPL1_HUMAN Probable aminopeptidase NPEPL1 OS=Homo sapiens (Human) OX=9606 GN=NPEPL1 PE=1 SV=3                                                                                                                | NPEPL1        |
| 263 | sp P46459 NSF_HUMAN Vesicle-fusing ATPase OS=Homo sapiens (Human) OX=9606 GN=NSF PE=1 SV=3                                                                                                                              | NSF           |
| 264 | sp Q0823 NSUN2_HUMAN RNA cytosine C(5)-methyltransferase NSUN2 OS=Homo sapiens (Human) OX=9606 GN=NSUN2 PE=1 SV=2                                                                                                       | NSUN2         |
| 265 | sp Q9Y266 NUDC_HUMAN Nuclear migration protein nudC OS=Homo sapiens (Human) OX=9606 GN=NUDC PE=1 SV=1                                                                                                                   | NUDC          |
| 266 | sp Q14980 NUMA1_HUMAN Nuclear mitotic apparatus protein 1 OS=Homo sapiens (Human) OX=9606 GN=NUMA1 PE=1 SV=2                                                                                                            | NUMA1         |
| 267 | sp P49790 NUP153_HUMAN Nuclear pore complex protein Nup153 OS=Homo sapiens (Human) OX=9606 GN=NUP153 PE=1 SV=2                                                                                                          | NUP153        |
| 268 | sp Q9BW27 NUP85_HUMAN Nuclear pore complex protein Nup85 OS=Homo sapiens (Human) OX=9606 GN=NUP85 PE=1 SV=1                                                                                                             | NUP85         |
| 269 | sp Q8N1F7 NUP93_HUMAN Nuclear pore complex protein Nup93 OS=Homo sapiens (Human) OX=9606 GN=NUP93 PE=1 SV=2                                                                                                             | NUP93         |
| 270 | sp Q9BVL2 NUP58_HUMAN Nucleoporin p58/p45 OS=Homo sapiens (Human) OX=9606 GN=NUP58 PE=1 SV=1                                                                                                                            | NUPL1         |
| 271 | sp Q9Y6K5 OAS3_HUMAN 2-5-oligoadenylate synthase 3 OS=Homo sapiens (Human) OX=9606 GN=OAS3 PE=1 SV=3                                                                                                                    | OAS3          |
| 272 | sp Q02218 ODO1_HUMAN 2-oxoglutarate dehydrogenase, mitochondrial OS=Homo sapiens (Human) OX=9606 GN=OGDH PE=1 SV=3                                                                                                      | OGDH          |
| 273 | sp Q9H4L5 OSBPL3_HUMAN Oxysterol-binding protein-related protein 3 OS=Homo sapiens (Human) OX=9606 GN=OSBPL3 PE=1 SV=1                                                                                                  | OSBPL3        |
| 274 | sp O15460 P4HA2_HUMAN Prolyl 4-hydroxylase subunit alpha-2 OS=Homo sapiens (Human) OX=9606 GN=P4HA2 PE=1 SV=1                                                                                                           | P4HA2         |
| 275 | sp P68402 PA1B2_HUMAN Platelet-activating factor acetylhydrolase IB subunit alpha2 OS=Homo sapiens (Human) OX=9606 GN=PFAH1B2 PE=1 SV=1                                                                                 | PFAH1B2       |
| 276 | sp Q460N5 PAR14_HUMAN Protein mono-ADP-ribosyltransferase PARP14 OS=Homo sapiens (Human) OX=9606 GN=PARP14 PE=1 SV=3                                                                                                    | PARP14        |

|     |                                                                                                                                                   |         |
|-----|---------------------------------------------------------------------------------------------------------------------------------------------------|---------|
| 277 | sp Q96KB5 TOPK_HUMAN Lymphokine-activated killer T-cell-originated protein kinase OS=Homo sapiens (Human) OX=9606 GN=PBK PE=1 SV=3                | PBK     |
| 278 | sp P11498 PYC_HUMAN Pyruvate carboxylase, mitochondrial OS=Homo sapiens (Human) OX=9606 GN=PC PE=1 SV=2                                           | PC      |
| 279 | sp Q16822 PCKGM_HUMAN Phosphoenolpyruvate carboxykinase [GTP], mitochondrial OS=Homo sapiens (Human) OX=9606 GN=PCK2 PE=1 SV=4                    | PCK2    |
| 280 | sp Q8NBM8 PCYXL_HUMAN Prenylcysteine oxidase-like OS=Homo sapiens (Human) OX=9606 GN=PCYOX1L PE=1 SV=2                                            | PCYOX1L |
| 281 | sp Q9H2J4 PDCL3_HUMAN Phosducin-like protein 3 OS=Homo sapiens (Human) OX=9606 GN=PDCL3 PE=1 SV=1                                                 | PDCL3   |
| 282 | sp P11177 ODPB_HUMAN Pyruvate dehydrogenase E1 component subunit beta, mitochondrial OS=Homo sapiens (Human) OX=9606 GN=PDHB PE=1 SV=3            | PDHB    |
| 283 | sp Q96HC4 PDLI5_HUMAN PDZ and LIM domain protein 5 OS=Homo sapiens (Human) OX=9606 GN=PDLIM5 PE=1 SV=5                                            | PDLIM5  |
| 284 | sp Q8NCN5 PDPR_HUMAN Pyruvate dehydrogenase phosphatase regulatory subunit, mitochondrial OS=Homo sapiens (Human) OX=9606 GN=PDPR PE=1 SV=2       | PDPR    |
| 285 | sp Q29RF7 PDS5A_HUMAN Sister chromatid cohesion protein PDS5 homolog A OS=Homo sapiens (Human) OX=9606 GN=PDS5A PE=1 SV=1                         | PDS5A   |
| 286 | sp Q9NTI5 PDS5B_HUMAN Sister chromatid cohesion protein PDS5 homolog B OS=Homo sapiens (Human) OX=9606 GN=PDS5B PE=1 SV=1                         | PDS5B   |
| 287 | sp Q6P996 PDXD1_HUMAN Pyridoxal-dependent decarboxylase domain-containing protein 1 OS=Homo sapiens (Human) OX=9606 GN=PDXDC1 PE=1 SV=2           | PDXDC1  |
| 288 | sp Q15121 PEA15_HUMAN Astrocytic phosphoprotein PEA-15 OS=Homo sapiens (Human) OX=9606 GN=PEA15 PE=1 SV=2                                         | PEA15   |
| 289 | sp P30086 PEBP1_HUMAN Phosphatidylethanolamine-binding protein 1 OS=Homo sapiens (Human) OX=9606 GN=PEBP1 PE=1 SV=3                               | PEBP1   |
| 290 | sp Q86TG7 PEG10_HUMAN Retrotransposon-derived protein PEG10 OS=Homo sapiens (Human) OX=9606 GN=PEG10 PE=1 SV=2                                    | PEG10   |
| 291 | sp Q8IZL8 PELP1_HUMAN Proline-, glutamic acid- and leucine-rich protein 1 OS=Homo sapiens (Human) OX=9606 GN=PELP1 PE=1 SV=2                      | PELP1   |
| 292 | sp O96011 PX11B_HUMAN Peroxisomal membrane protein 11B OS=Homo sapiens (Human) OX=9606 GN=PEX11B PE=1 SV=1                                        | PEX11B  |
| 293 | sp P17858 PFKAL_HUMAN ATP-dependent 6-phosphofructokinase, liver type OS=Homo sapiens (Human) OX=9606 GN=PFKL PE=1 SV=6                           | PFKL    |
| 294 | sp P52209 6PGD_HUMAN 6-phosphogluconate dehydrogenase, decarboxylating OS=Homo sapiens (Human) OX=9606 GN=PGD PE=1 SV=3                           | PGD     |
| 295 | sp Q8IZ21 PHAR4_HUMAN Phosphatase and actin regulator 4 OS=Homo sapiens (Human) OX=9606 GN=PHACTR4 PE=1 SV=1                                      | PHACTR4 |
| 296 | sp Q9H490 PIGU_HUMAN Phosphatidylinositol glycan anchor biosynthesis class U protein OS=Homo sapiens (Human) OX=9606 GN=PIGU PE=1 SV=3            | PIGU    |
| 297 | sp Q13526 PIN1_HUMAN Peptidyl-prolyl cis-trans isomerase NIMA-interacting 1 OS=Homo sapiens (Human) OX=9606 GN=PIN1 PE=1 SV=1                     | PIN1    |
| 298 | sp Q16513 PKN2_HUMAN Serine/threonine-protein kinase N2 OS=Homo sapiens (Human) OX=9606 GN=PKN2 PE=1 SV=1                                         | PKN2    |
| 299 | sp Q99959 PKP2_HUMAN Plakophilin-2 OS=Homo sapiens (Human) OX=9606 GN=PKP2 PE=1 SV=2                                                              | PKP2    |
| 300 | sp P13797 PLS3_HUMAN Plastin-3 OS=Homo sapiens (Human) OX=9606 GN=PLS3 PE=1 SV=4                                                                  | PLS3    |
| 301 | sp Q10713 MPPA_HUMAN Mitochondrial-processing peptidase subunit alpha OS=Homo sapiens (Human) OX=9606 GN=PMPCA PE=1 SV=2                          | PMPCA   |
| 302 | sp Q9NRR1 PNO1_HUMAN RNA-binding protein PNO1 OS=Homo sapiens (Human) OX=9606 GN=PNO1 PE=1 SV=1                                                   | PNO1    |
| 303 | sp P28340 DPOD1_HUMAN DNA polymerase delta catalytic subunit OS=Homo sapiens (Human) OX=9606 GN=POLD1 PE=1 SV=2                                   | POLD1   |
| 304 | sp P52434 RPAB3_HUMAN DNA-directed RNA polymerases I, II, and III subunit RPABC3 OS=Homo sapiens (Human) OX=9606 GN=POLR2H PE=1 SV=4              | POLR2H  |
| 305 | sp Q15165 PON2_HUMAN Serum paraoxonase/arylesterase 2 OS=Homo sapiens (Human) OX=9606 GN=PON2 PE=1 SV=4                                           | PON2    |
| 306 | sp P45877 PPIC_HUMAN Peptidyl-prolyl cis-trans isomerase C OS=Homo sapiens (Human) OX=9606 GN=PPIC PE=1 SV=1                                      | PPIC    |
| 307 | sp O43447 PPIH_HUMAN Peptidyl-prolyl cis-trans isomerase H OS=Homo sapiens (Human) OX=9606 GN=PPIH PE=1 SV=1                                      | PPIH    |
| 308 | sp P49593 PPM1F_HUMAN Protein phosphatase 1F OS=Homo sapiens (Human) OX=9606 GN=PPM1F PE=1 SV=3                                                   | PPM1F   |
| 309 | sp P62136 PP1A_HUMAN Serine/threonine-protein phosphatase PP1-alpha catalytic subunit OS=Homo sapiens (Human) OX=9606 GN=PPP1CA PE=1 SV=1         | PPP1CA  |
| 310 | sp Q12972 PP1R8_HUMAN Nuclear inhibitor of protein phosphatase 1 OS=Homo sapiens (Human) OX=9606 GN=PPP1R8 PE=1 SV=2                              | PPP1R8  |
| 311 | sp Q08209 PP2BA_HUMAN Serine/threonine-protein phosphatase 2B catalytic subunit alpha isoform OS=Homo sapiens (Human) OX=9606 GN=PPP3CA PE=1 SV=1 | PPP3CA  |
| 312 | sp P30044 PRDX5_HUMAN Peroxiredoxin-5, mitochondrial OS=Homo sapiens (Human) OX=9606 GN=PRDX5 PE=1 SV=4                                           | PRDX5   |
| 313 | sp P17612 KAPCA_HUMAN cAMP-dependent protein kinase catalytic subunit alpha OS=Homo sapiens (Human) OX=9606 GN=PRKACA PE=1 SV=2                   | PRKACA  |

|     |                                                                                                                                                        |          |
|-----|--------------------------------------------------------------------------------------------------------------------------------------------------------|----------|
| 314 | sp P22694 KAPCB_HUMAN cAMP-dependent protein kinase catalytic subunit beta OS=Homo sapiens (Human) OX=9606 GN=PRKACB PE=1 SV=2                         | PRKACB   |
| 315 | sp Q969G5 CAVN3_HUMAN Caveolae-associated protein 3 OS=Homo sapiens (Human) OX=9606 GN=CAVIN3 PE=1 SV=3                                                | PRKCDBP  |
| 316 | sp P41743 KPCI_HUMAN Protein kinase C iota type OS=Homo sapiens (Human) OX=9606 GN=PRKCI PE=1 SV=2                                                     | PRKCI    |
| 317 | sp O75569 PRKRA_HUMAN Interferon-inducible double-stranded RNA-dependent protein kinase activator A OS=Homo sapiens (Human) OX=9606 GN=PRKRA PE=1 SV=1 | PRKRA    |
| 318 | sp O14744 ANM5_HUMAN Protein arginine N-methyltransferase 5 OS=Homo sapiens (Human) OX=9606 GN=PRMT5 PE=1 SV=4                                         | PRMT5    |
| 319 | sp Q6P2Q9 PRP8_HUMAN Pre-mRNA-processing-splicing factor 8 OS=Homo sapiens (Human) OX=9606 GN=PRPF8 PE=1 SV=2                                          | PRPF8    |
| 320 | sp P60900 PSA6_HUMAN Proteasome subunit alpha type-6 OS=Homo sapiens (Human) OX=9606 GN=PSMA6 PE=1 SV=1                                                | PSMA6    |
| 321 | sp Q99460 PSMD1_HUMAN 26S proteasome non-ATPase regulatory subunit 1 OS=Homo sapiens (Human) OX=9606 GN=PSMD1 PE=1 SV=2                                | PSMD1    |
| 322 | sp O95456 PSMG1_HUMAN Proteasome assembly chaperone 1 OS=Homo sapiens (Human) OX=9606 GN=PSMG1 PE=1 SV=1                                               | PSMG1    |
| 323 | sp Q15185 TEBP_HUMAN Prostaglandin E synthase 3 OS=Homo sapiens (Human) OX=9606 GN=PTGES3 PE=1 SV=1                                                    | PTGES3   |
| 324 | sp Q13308 PTK7_HUMAN Inactive tyrosine-protein kinase 7 OS=Homo sapiens (Human) OX=9606 GN=PTK7 PE=1 SV=2                                              | PTK7     |
| 325 | sp Q9UHX1 PUF60_HUMAN Poly(U)-binding-splicing factor PUF60 OS=Homo sapiens (Human) OX=9606 GN=PUF60 PE=1 SV=1                                         | PUF60    |
| 326 | sp Q9Y606 TRUA_HUMAN tRNA pseudouridine synthase A OS=Homo sapiens (Human) OX=9606 GN=PUS1 PE=1 SV=3                                                   | PUS1     |
| 327 | sp Q9ULZ3 ASC_HUMAN Apoptosis-associated speck-like protein containing a CARD OS=Homo sapiens (Human) OX=9606 GN=PYCARD PE=1 SV=2                      | PYCARD   |
| 328 | sp P11216 PYGB_HUMAN Glycogen phosphorylase, brain form OS=Homo sapiens (Human) OX=9606 GN=PYGB PE=1 SV=5                                              | PYGB     |
| 329 | sp P06737 PYGL_HUMAN Glycogen phosphorylase, liver form OS=Homo sapiens (Human) OX=9606 GN=PYGL PE=1 SV=4                                              | PYGL     |
| 330 | sp Q6ZRP7 QSOX2_HUMAN Sulfhydryl oxidase 2 OS=Homo sapiens (Human) OX=9606 GN=QSOX2 PE=1 SV=3                                                          | QSOX2    |
| 331 | sp P61026 RAB10_HUMAN Ras-related protein Rab-10 OS=Homo sapiens (Human) OX=9606 GN=RAB10 PE=1 SV=1                                                    | RAB10    |
| 332 | sp Q92696 PGTA_HUMAN Geranylgeranyl transferase type-2 subunit alpha OS=Homo sapiens (Human) OX=9606 GN=RABGGTA PE=1 SV=2                              | RABGGTA  |
| 333 | sp Q3YEC7 RABL6_HUMAN Rab-like protein 6 OS=Homo sapiens (Human) OX=9606 GN=RABL6 PE=1 SV=2                                                            | RABL6    |
| 334 | sp Q9H0H5 RGAP1_HUMAN Rac GTPase-activating protein 1 OS=Homo sapiens (Human) OX=9606 GN=RACGAP1 PE=1 SV=1                                             | RACGAP1  |
| 335 | sp P46060 RAGP1_HUMAN Ran GTPase-activating protein 1 OS=Homo sapiens (Human) OX=9606 GN=RANGAP1 PE=1 SV=1                                             | RANGAP1  |
| 336 | sp P52306 GDS1_HUMAN Rap1 GTPase-GDP dissociation stimulator 1 OS=Homo sapiens (Human) OX=9606 GN=RAP1GDS1 PE=1 SV=3                                   | RAP1GDS1 |
| 337 | sp P18754 RCC1_HUMAN Regulator of chromosome condensation OS=Homo sapiens (Human) OX=9606 GN=RCC1 PE=1 SV=1                                            | RCC1     |
| 338 | sp Q14257 RCN2_HUMAN Reticulocalbin-2 OS=Homo sapiens (Human) OX=9606 GN=RCN2 PE=1 SV=1                                                                | RCN2     |
| 339 | sp Q96D15 RCN3_HUMAN Reticulocalbin-3 OS=Homo sapiens (Human) OX=9606 GN=RCN3 PE=1 SV=1                                                                | RCN3     |
| 340 | sp Q8TC12 RDH11_HUMAN Retinol dehydrogenase 11 OS=Homo sapiens (Human) OX=9606 GN=RDH11 PE=1 SV=2                                                      | RDH11    |
| 341 | sp P35251 RFC1_HUMAN Replication factor C subunit 1 OS=Homo sapiens (Human) OX=9606 GN=RFC1 PE=1 SV=4                                                  | RFC1     |
| 342 | sp Q6NTF9 RHBD2_HUMAN Rhomboid domain-containing protein 2 OS=Homo sapiens (Human) OX=9606 GN=RHBDD2 PE=1 SV=2                                         | RHBDD2   |
| 343 | sp P61586 RHOA_HUMAN Transforming protein RhoA OS=Homo sapiens (Human) OX=9606 GN=RHOA PE=1 SV=1                                                       | RHOA     |
| 344 | sp Q96DB5 RMD1_HUMAN Regulator of microtubule dynamics protein 1 OS=Homo sapiens (Human) OX=9606 GN=RMDN1 PE=1 SV=1                                    | RMDN1    |
| 345 | sp Q9H4A4 AMPB_HUMAN Aminopeptidase B OS=Homo sapiens (Human) OX=9606 GN=RNPEP PE=1 SV=2                                                               | RNPEP    |
| 346 | sp P46776 RL27A_HUMAN 60S ribosomal protein L27a OS=Homo sapiens (Human) OX=9606 GN=RPL27A PE=1 SV=2                                                   | RPL27A   |
| 347 | sp Q02878 RL6_HUMAN 60S ribosomal protein L6 OS=Homo sapiens (Human) OX=9606 GN=RPL6 PE=1 SV=3                                                         | RPL6     |
| 348 | sp P04843 RPN1_HUMAN Dolichyl-diphosphooligosaccharide--protein glycosyltransferase subunit 1 OS=Homo sapiens (Human) OX=9606 GN=RPN1 PE=1 SV=1        | RPN1     |
| 349 | sp P15880 RS2_HUMAN 40S ribosomal protein S2 OS=Homo sapiens (Human) OX=9606 GN=RPS2 PE=1 SV=2                                                         | RPS2     |
| 350 | sp P62847 RS24_HUMAN 40S ribosomal protein S24 OS=Homo sapiens (Human) OX=9606 GN=RPS24 PE=1 SV=1                                                      | RPS24    |
| 351 | sp P10301 RRAS_HUMAN Ras-related protein R-Ras OS=Homo sapiens (Human) OX=9606 GN=RRAS PE=1 SV=1                                                       | RRAS     |
| 352 | sp O95197 RTN3_HUMAN Reticulon-3 OS=Homo sapiens (Human) OX=9606 GN=RTN3 PE=1 SV=2                                                                     | RTN3     |
| 353 | sp P05109 S10A8_HUMAN Protein S100-A8 OS=Homo sapiens (Human) OX=9606 GN=S100A8 PE=1 SV=1                                                              | S100A8   |
| 354 | sp Q9UBE0 SAE1_HUMAN SUMO-activating enzyme subunit 1 OS=Homo sapiens (Human) OX=9606 GN=SAE1 PE=1 SV=1                                                | SAE1     |



|     |                                                                                                                                                                         |          |
|-----|-------------------------------------------------------------------------------------------------------------------------------------------------------------------------|----------|
| 355 | sp Q5K651 SAMD9_HUMAN Sterile alpha motif domain-containing protein 9 OS=Homo sapiens (Human) OX=9606 GN=SAMD9 PE=1 SV=1                                                | SAMD9    |
| 356 | sp Q8IVG5 SAM9L_HUMAN Sterile alpha motif domain-containing protein 9-like OS=Homo sapiens (Human) OX=9606 GN=SAMD9L PE=1 SV=2                                          | SAMD9L   |
| 357 | sp O00422 SAP18_HUMAN Histone deacetylase complex subunit SAP18 OS=Homo sapiens (Human) OX=9606 GN=SAP18 PE=1 SV=1                                                      | SAP18    |
| 358 | sp P49591 SYSC_HUMAN Serine--tRNA ligase, cytoplasmic OS=Homo sapiens (Human) OX=9606 GN=SARS1 PE=1 SV=3                                                                | SARS     |
| 359 | sp Q15020 SART3_HUMAN Squamous cell carcinoma antigen recognized by T-cells 3 OS=Homo sapiens (Human) OX=9606 GN=SART3 PE=1 SV=1                                        | SART3    |
| 360 | sp Q9HB40 RISC_HUMAN Retinoid-inducible serine carboxypeptidase OS=Homo sapiens (Human) OX=9606 GN=SCPEP1 PE=1 SV=1                                                     | SCPEP1   |
| 361 | sp P18827 SDC1_HUMAN Syndecan-1 OS=Homo sapiens (Human) OX=9606 GN=SDC1 PE=1 SV=3                                                                                       | SDC1     |
| 362 | sp P31431 SDC4_HUMAN Syndecan-4 OS=Homo sapiens (Human) OX=9606 GN=SDC4 PE=1 SV=2                                                                                       | SDC4     |
| 363 | sp Q9BRK5 CAB45_HUMAN 45 kDa calcium-binding protein OS=Homo sapiens (Human) OX=9606 GN=SDF4 PE=1 SV=1                                                                  | SDF4     |
| 364 | sp P21912 SDHB_HUMAN Succinate dehydrogenase [ubiquinone] iron-sulfur subunit, mitochondrial OS=Homo sapiens (Human) OX=9606 GN=SDHB PE=1 SV=3                          | SDHB     |
| 365 | sp Q99643 C560_HUMAN Succinate dehydrogenase cytochrome b560 subunit, mitochondrial OS=Homo sapiens (Human) OX=9606 GN=SDHC PE=1 SV=1                                   | SDHC     |
| 366 | sp P55735 SEC13_HUMAN Protein SEC13 homolog OS=Homo sapiens (Human) OX=9606 GN=SEC13 PE=1 SV=3                                                                          | SEC13    |
| 367 | sp O15027 SC16A_HUMAN Protein transport protein Sec16A OS=Homo sapiens (Human) OX=9606 GN=SEC16A PE=1 SV=4                                                              | SEC16A   |
| 368 | sp O95487 SC24B_HUMAN Protein transport protein Sec24B OS=Homo sapiens (Human) OX=9606 GN=SEC24B PE=1 SV=2                                                              | SEC24B   |
| 369 | sp P60059 SC61G_HUMAN Protein transport protein Sec61 subunit gamma OS=Homo sapiens (Human) OX=9606 GN=SEC61G PE=1 SV=1                                                 | SEC61G   |
| 370 | sp Q6UXD5 SE6L2_HUMAN Seizure 6-like protein 2 OS=Homo sapiens (Human) OX=9606 GN=SEZ6L2 PE=1 SV=2                                                                      | SEZ6L2   |
| 371 | sp Q15393 SF3B3_HUMAN Splicing factor 3B subunit 3 OS=Homo sapiens (Human) OX=9606 GN=SF3B3 PE=1 SV=4                                                                   | SF3B3    |
| 372 | sp Q9BWM7 SFXN3_HUMAN Sideroflexin-3 OS=Homo sapiens (Human) OX=9606 GN=SFXN3 PE=1 SV=3                                                                                 | SFXN3    |
| 373 | sp Q9NR46 SHLB2_HUMAN Endophilin-B2 OS=Homo sapiens (Human) OX=9606 GN=SH3GLB2 PE=1 SV=1                                                                                | SH3GLB2  |
| 374 | sp P29353 SHC1_HUMAN SHC-transforming protein 1 OS=Homo sapiens (Human) OX=9606 GN=SHC1 PE=1 SV=4                                                                       | SHC1     |
| 375 | sp O15427 MOT4_HUMAN Monocarboxylate transporter 4 OS=Homo sapiens (Human) OX=9606 GN=SLC16A3 PE=1 SV=1                                                                 | SLC16A3  |
| 376 | sp Q9UBX3 DIC_HUMAN Mitochondrial dicarboxylate carrier OS=Homo sapiens (Human) OX=9606 GN=SLC25A10 PE=1 SV=2                                                           | SLC25A10 |
| 377 | sp Q9UJS0 CMC2_HUMAN Calcium-binding mitochondrial carrier protein Aralar2 OS=Homo sapiens (Human) OX=9606 GN=SLC25A13 PE=1 SV=2                                        | SLC25A13 |
| 378 | sp Q6NUK1 SCMC1_HUMAN Calcium-binding mitochondrial carrier protein ScaMC-1 OS=Homo sapiens (Human) OX=9606 GN=SLC25A24 PE=1 SV=2                                       | SLC25A24 |
| 379 | sp P05141 ADT2_HUMAN ADP/ATP translocase 2 OS=Homo sapiens (Human) OX=9606 GN=SLC25A5 PE=1 SV=7                                                                         | SLC25A5  |
| 380 | sp Q15796 SMAD2_HUMAN Mothers against decapentaplegic homolog 2 OS=Homo sapiens (Human) OX=9606 GN=SMAD2 PE=1 SV=1                                                      | SMAD2    |
| 381 | sp Q12824 SNF5_HUMAN SWI/SNF-related matrix-associated actin-dependent regulator of chromatin subfamily B member 1 OS=Homo sapiens (Human) OX=9606 GN=SMARCB1 PE=1 SV=2 | SMARCB1  |
| 382 | sp O95347 SMC2_HUMAN Structural maintenance of chromosomes protein 2 OS=Homo sapiens (Human) OX=9606 GN=SMC2 PE=1 SV=2                                                  | SMC2     |
| 383 | sp Q6GMV2 SMYD5_HUMAN SET and MYND domain-containing protein 5 OS=Homo sapiens (Human) OX=9606 GN=SMYD5 PE=1 SV=2                                                       | SMYD5    |
| 384 | sp O75643 U520_HUMAN U5 small nuclear ribonucleoprotein 200 kDa helicase OS=Homo sapiens (Human) OX=9606 GN=SNRNP200 PE=1 SV=2                                          | SNRNP200 |
| 385 | sp Q96L92 SNX27_HUMAN Sorting nexin-27 OS=Homo sapiens (Human) OX=9606 GN=SNX27 PE=1 SV=2                                                                               | SNX27    |
| 386 | sp O95219 SNX4_HUMAN Sorting nexin-4 OS=Homo sapiens (Human) OX=9606 GN=SNX4 PE=1 SV=1                                                                                  | SNX4     |
| 387 | sp Q9NUQ6 SPS2L_HUMAN SPATS2-like protein OS=Homo sapiens (Human) OX=9606 GN=SPATS2L PE=1 SV=2                                                                          | SPATS2L  |
| 388 | sp Q8NBT2 SPC24_HUMAN Kinetochore protein Spc24 OS=Homo sapiens (Human) OX=9606 GN=SPC24 PE=1 SV=2                                                                      | SPC24    |
| 389 | sp O15269 SPTLC1_HUMAN Serine palmitoyltransferase 1 OS=Homo sapiens (Human) OX=9606 GN=SPTLC1 PE=1 SV=1                                                                | SPTLC1   |
| 390 | sp O15270 SPTLC2_HUMAN Serine palmitoyltransferase 2 OS=Homo sapiens (Human) OX=9606 GN=SPTLC2 PE=1 SV=1                                                                | SPTLC2   |
| 391 | sp P12931 SRC_HUMAN Proto-oncogene tyrosine-protein kinase Src OS=Homo sapiens (Human) OX=9606 GN=SRC PE=1 SV=3                                                         | SRC      |
| 392 | sp O76094 SRP72_HUMAN Signal recognition particle subunit SRP72 OS=Homo sapiens (Human) OX=9606 GN=SRP72 PE=1 SV=3                                                      | SRP72    |
| 393 | sp Q16629 SRSF7_HUMAN Serine/arginine-rich splicing factor 7 OS=Homo sapiens (Human) OX=9606 GN=SRSF7 PE=1 SV=1                                                         | SRSF7    |
| 394 | sp P05455 LA_HUMAN Lupus La protein OS=Homo sapiens (Human) OX=9606 GN=SSB PE=1 SV=2                                                                                    | SSB      |
| 395 | sp Q8N3U4 STAG2_HUMAN Cohesin subunit SA-2 OS=Homo sapiens (Human) OX=9606 GN=STAG2 PE=1 SV=3                                                                           | STAG2    |
| 396 | sp P42224 STAT1_HUMAN Signal transducer and activator of transcription 1-alpha/beta OS=Homo sapiens (Human) OX=9606 GN=STAT1 PE=1 SV=2                                  | STAT1    |

|     |                                                                                                                                                                                                                                                                                                    |             |
|-----|----------------------------------------------------------------------------------------------------------------------------------------------------------------------------------------------------------------------------------------------------------------------------------------------------|-------------|
| 397 | sp O95793 STAU1_HUMAN Double-stranded RNA-binding protein Staufens homolog 1 OS=Homo sapiens (Human) OX=9606 GN=STAU1 PE=1 SV=2                                                                                                                                                                    | STAU1       |
| 398 | sp Q9UEW8 STK39_HUMAN STE20/SPS1-related proline-alanine-rich protein kinase OS=Homo sapiens (Human) OX=9606 GN=STK39 PE=1 SV=3                                                                                                                                                                    | STK39       |
| 399 | sp Q8TCJ2 STT3B_HUMAN Dolichyl-diphosphooligosaccharide--protein glycosyltransferase subunit STT3B OS=Homo sapiens (Human) OX=9606 GN=STT3B PE=1 SV=1                                                                                                                                              | STT3B       |
| 400 | sp Q9UNE7 CHIP_HUMAN E3 ubiquitin-protein ligase CHIP OS=Homo sapiens (Human) OX=9606 GN=STUB1 PE=1 SV=2                                                                                                                                                                                           | STUB1       |
| 401 | sp P53597 SUCA_HUMAN Succinate--CoA ligase [ADP/GDP-forming] subunit alpha, mitochondrial OS=Homo sapiens (Human) OX=9606 GN=SUCLG1 PE=1 SV=4                                                                                                                                                      | SUCLG1      |
| 402 | sp P55854 SUMO3_HUMAN Small ubiquitin-related modifier 3 OS=Homo sapiens (Human) OX=9606 GN=SUMO3 PE=1 SV=2                                                                                                                                                                                        | SUMO3       |
| 403 | sp O95425 SVIL_HUMAN Supravillin OS=Homo sapiens (Human) OX=9606 GN=SVIL PE=1 SV=2                                                                                                                                                                                                                 | SVIL        |
| 404 | sp P37837 TALDO_HUMAN Transaldolase OS=Homo sapiens (Human) OX=9606 GN=TALDO1 PE=1 SV=2                                                                                                                                                                                                            | TALDO1      |
| 405 | sp Q03518 TAP1_HUMAN Antigen peptide transporter 1 OS=Homo sapiens (Human) OX=9606 GN=TAP1 PE=1 SV=2                                                                                                                                                                                               | TAP1        |
| 406 | sp Q8TC07 TBC15_HUMAN TBC1 domain family member 15 OS=Homo sapiens (Human) OX=9606 GN=TBC1D15 PE=1 SV=2                                                                                                                                                                                            | TBC1D15     |
| 407 | sp Q14241 ELOA1_HUMAN Elongin-A OS=Homo sapiens (Human) OX=9606 GN=ELOA PE=1 SV=2                                                                                                                                                                                                                  | TCEB3       |
| 408 | sp P17987 TCPA_HUMAN T-complex protein 1 subunit alpha OS=Homo sapiens (Human) OX=9606 GN=TCP1 PE=1 SV=1                                                                                                                                                                                           | TCP1        |
| 409 | sp Q9Y6I9 TX264_HUMAN Testis-expressed protein 264 OS=Homo sapiens (Human) OX=9606 GN=TEX264 PE=1 SV=1                                                                                                                                                                                             | TEX264      |
| 410 | sp Q92734 TFG_HUMAN Protein TFG OS=Homo sapiens (Human) OX=9606 GN=TFG PE=1 SV=2                                                                                                                                                                                                                   | TFG         |
| 411 | sp P02786 TFR1_HUMAN Transferrin receptor protein 1 OS=Homo sapiens (Human) OX=9606 GN=TFRC PE=1 SV=2                                                                                                                                                                                              | TFRC        |
| 412 | sp P21980 TGM2_HUMAN Protein-glutamine gamma-glutamyltransferase 2 OS=Homo sapiens (Human) OX=9606 GN=TGM2 PE=1 SV=2                                                                                                                                                                               | TGM2        |
| 413 | sp Q96CP7 TLCD1_HUMAN TLC domain-containing protein 1 OS=Homo sapiens (Human) OX=9606 GN=TLCD1 PE=1 SV=1                                                                                                                                                                                           | TLCD1       |
| 414 | sp Q99805 TM9S2_HUMAN Transmembrane 9 superfamily member 2 OS=Homo sapiens (Human) OX=9606 GN=TM9SF2 PE=1 SV=1                                                                                                                                                                                     | TM9SF2      |
| 415 | sp Q9HD45 TM9S3_HUMAN Transmembrane 9 superfamily member 3 OS=Homo sapiens (Human) OX=9606 GN=TM9SF3 PE=1 SV=2                                                                                                                                                                                     | TM9SF3      |
| 416 | sp Q9HC07 TM165_HUMAN Transmembrane protein 165 OS=Homo sapiens (Human) OX=9606 GN=TMEM165 PE=1 SV=1                                                                                                                                                                                               | TMEM165     |
| 417 | sp Q8N2U0 TM256_HUMAN Transmembrane protein 256 OS=Homo sapiens (Human) OX=9606 GN=TMEM256 PE=3 SV=1                                                                                                                                                                                               | TMEM256     |
| 418 | sp P57088 TMM33_HUMAN Transmembrane protein 33 OS=Homo sapiens (Human) OX=9606 GN=TMEM33 PE=1 SV=2                                                                                                                                                                                                 | TMEM33      |
| 419 | sp Q9Y320 TMX2_HUMAN Thioredoxin-related transmembrane protein 2 OS=Homo sapiens (Human) OX=9606 GN=TMX2 PE=1 SV=1                                                                                                                                                                                 | TMX2        |
| 420 | sp Q9C0C2 TB182_HUMAN 182 kDa tankyrase-1-binding protein OS=Homo sapiens (Human) OX=9606 GN=TNKS1BP1 PE=1 SV=4                                                                                                                                                                                    | TNKS1BP1    |
| 421 | sp Q92973 TNPO1_HUMAN Transportin-1 OS=Homo sapiens (Human) OX=9606 GN=TNPO1 PE=1 SV=2                                                                                                                                                                                                             | TNPO1       |
| 422 | sp Q68CZ2 TENS3_HUMAN Tensin-3 OS=Homo sapiens (Human) OX=9606 GN=TNS3 PE=1 SV=2                                                                                                                                                                                                                   | TNS3        |
| 423 | sp O94826 TOM70_HUMAN Mitochondrial import receptor subunit TOM70 OS=Homo sapiens (Human) OX=9606 GN=TOMM70 PE=1 SV=1                                                                                                                                                                              | TOMM70A     |
| 424 | sp P62995 TRA2B_HUMAN Transformer-2 protein homolog beta OS=Homo sapiens (Human) OX=9606 GN=TRA2B PE=1 SV=1                                                                                                                                                                                        | TRA2B       |
| 425 | sp Q15629 TRAM1_HUMAN Translocating chain-associated membrane protein 1 OS=Homo sapiens (Human) OX=9606 GN=TRAM1 PE=1 SV=3                                                                                                                                                                         | TRAM1       |
| 426 | sp P36406 TRI23_HUMAN E3 ubiquitin-protein ligase TRIM23 OS=Homo sapiens (Human) OX=9606 GN=TRIM23 PE=1 SV=1                                                                                                                                                                                       | TRIM23      |
| 427 | sp Q14258 TRI25_HUMAN E3 ubiquitin/ISG15 ligase TRIM25 OS=Homo sapiens (Human) OX=9606 GN=TRIM25 PE=1 SV=2                                                                                                                                                                                         | TRIM25      |
| 428 | sp Q15645 PCH2_HUMAN Pachytene checkpoint protein 2 homolog OS=Homo sapiens (Human) OX=9606 GN=TRIP13 PE=1 SV=2                                                                                                                                                                                    | TRIP13      |
| 429 | sp O75157 T22D2_HUMAN TSC22 domain family protein 2 OS=Homo sapiens (Human) OX=9606 GN=TSC22D2 PE=1 SV=3                                                                                                                                                                                           | TSC22D2     |
| 430 | sp Q9BSV6 SEN34_HUMAN tRNA-splicing endonuclease subunit Sen34 OS=Homo sapiens (Human) OX=9606 GN=TSEN34 PE=1 SV=1                                                                                                                                                                                 | TSEN34      |
| 431 | sp Q71U36 TBA1A_HUMAN Tubulin alpha-1A chain OS=Homo sapiens (Human) OX=9606 GN=TUBA1A PE=1 SV=1;sp P0DPH8 TBA3D_HUMAN Tubulin alpha-3D chain OS=Homo sapiens (Human) OX=9606 GN=TUBA3D PE=1 SV=1;sp P0DPH7 TBA3C_HUMAN Tubulin alpha-3C chain OS=Homo sapiens (Human) OX=9606 GN=TUBA3C PE=1 SV=1 | TUBA1A      |
| 432 | sp P68366 TBA4A_HUMAN Tubulin alpha-4A chain OS=Homo sapiens (Human) OX=9606 GN=TUBA4A PE=1 SV=1                                                                                                                                                                                                   | TUBA4A      |
| 433 | sp Q9BUF5 TBB6_HUMAN Tubulin beta-6 chain OS=Homo sapiens (Human) OX=9606 GN=TUBB6 PE=1 SV=1                                                                                                                                                                                                       | TUBB6       |
| 434 | sp P23258 TBG1_HUMAN Tubulin gamma-1 chain OS=Homo sapiens (Human) OX=9606 GN=TUBG1 PE=1 SV=2;sp Q9NRH3 TBG2_HUMAN Tubulin gamma-2 chain OS=Homo sapiens (Human) OX=9606 GN=TUBG2 PE=2 SV=1                                                                                                        | TUBG1;TUBG2 |

|     |                                                                                                                                                                                                                           |               |
|-----|---------------------------------------------------------------------------------------------------------------------------------------------------------------------------------------------------------------------------|---------------|
| 435 | sp O14530 TXND9_HUMAN Thioredoxin domain-containing protein 9 OS=Homo sapiens (Human) OX=9606 GN=TXNDC9 PE=1 SV=2                                                                                                         | TXNDC9        |
| 436 | sp Q9BZF9 UACA_HUMAN Uveal autoantigen with coiled-coil domains and ankyrin repeats OS=Homo sapiens (Human) OX=9606 GN=UACA PE=1 SV=2                                                                                     | UACA          |
| 437 | sp Q16222 UAP1_HUMAN UDP-N-acetylhexosamine pyrophosphorylase OS=Homo sapiens (Human) OX=9606 GN=UAP1 PE=1 SV=3                                                                                                           | UAP1          |
| 438 | sp Q8TBC4 UBA3_HUMAN NEDD8-activating enzyme E1 catalytic subunit OS=Homo sapiens (Human) OX=9606 GN=UBA3 PE=1 SV=2                                                                                                       | UBA3          |
| 439 | sp A0AVT1 UBA6_HUMAN Ubiquitin-like modifier-activating enzyme 6 OS=Homo sapiens (Human) OX=9606 GN=UBA6 PE=1 SV=1                                                                                                        | UBA6          |
| 440 | sp Q5T6F2 UBAP2_HUMAN Ubiquitin-associated protein 2 OS=Homo sapiens (Human) OX=9606 GN=UBAP2 PE=1 SV=1                                                                                                                   | UBAP2         |
| 441 | sp Q96LR5 UB2E2_HUMAN Ubiquitin-conjugating enzyme E2 E2 OS=Homo sapiens (Human) OX=9606 GN=UBE2E2 PE=1 SV=1;sp Q969T4 UB2E3_HUMAN Ubiquitin-conjugating enzyme E2 E3 OS=Homo sapiens (Human) OX=9606 GN=UBE2E3 PE=1 SV=1 | UBE2E2;UBE2E3 |
| 442 | sp O14933 UB2L6_HUMAN Ubiquitin/ISG15-conjugating enzyme E2 L6 OS=Homo sapiens (Human) OX=9606 GN=UBE2L6 PE=1 SV=4                                                                                                        | UBE2L6        |
| 443 | sp Q8WVY7 UBCP1_HUMAN Ubiquitin-like domain-containing CTD phosphatase 1 OS=Homo sapiens (Human) OX=9606 GN=UBLCP1 PE=1 SV=2                                                                                              | UBLCP1        |
| 444 | sp P17480 UBF1_HUMAN Nucleolar transcription factor 1 OS=Homo sapiens (Human) OX=9606 GN=UBTF PE=1 SV=1                                                                                                                   | UBTF          |
| 445 | sp Q92890 UFD1_HUMAN Ubiquitin recognition factor in ER-associated degradation protein 1 OS=Homo sapiens (Human) OX=9606 GN=UFD1 PE=1 SV=3                                                                                | UFD1L         |
| 446 | sp Q9NUQ7 UFSP2_HUMAN Ufm1-specific protease 2 OS=Homo sapiens (Human) OX=9606 GN=UFSP2 PE=1 SV=3                                                                                                                         | UFSP2         |
| 447 | sp P11172 UMPS_HUMAN Uridine 5-monophosphate synthase OS=Homo sapiens (Human) OX=9606 GN=UMPS PE=1 SV=1                                                                                                                   | UMPS          |
| 448 | sp Q70J99 UN13D_HUMAN Protein unc-13 homolog D OS=Homo sapiens (Human) OX=9606 GN=UNC13D PE=1 SV=1                                                                                                                        | UNC13D        |
| 449 | sp Q16831 UPP1_HUMAN Uridine phosphorylase 1 OS=Homo sapiens (Human) OX=9606 GN=UPP1 PE=1 SV=1                                                                                                                            | UPP1          |
| 450 | sp Q9UDW1 QCR9_HUMAN Cytochrome b-c1 complex subunit 9 OS=Homo sapiens (Human) OX=9606 GN=UQCR10 PE=1 SV=3                                                                                                                | UQCR10        |
| 451 | sp P14927 QCR7_HUMAN Cytochrome b-c1 complex subunit 7 OS=Homo sapiens (Human) OX=9606 GN=UQCRB PE=1 SV=2                                                                                                                 | UQCRB         |
| 452 | sp P31930 QCR1_HUMAN Cytochrome b-c1 complex subunit 1, mitochondrial OS=Homo sapiens (Human) OX=9606 GN=UQCRC1 PE=1 SV=3                                                                                                 | UQCRC1        |
| 453 | sp P61758 PFD3_HUMAN Prefoldin subunit 3 OS=Homo sapiens (Human) OX=9606 GN=VBP1 PE=1 SV=4                                                                                                                                | VBP1          |
| 454 | sp Q3ZAQ7 VMA21_HUMAN Vacuolar ATPase assembly integral membrane protein VMA21 OS=Homo sapiens (Human) OX=9606 GN=VMA21 PE=1 SV=1                                                                                         | VMA21         |
| 455 | sp Q9UBQ0 VPS29_HUMAN Vacuolar protein sorting-associated protein 29 OS=Homo sapiens (Human) OX=9606 GN=VPS29 PE=1 SV=1                                                                                                   | VPS29         |
| 456 | sp Q9H9H4 VP37B_HUMAN Vacuolar protein sorting-associated protein 37B OS=Homo sapiens (Human) OX=9606 GN=VPS37B PE=1 SV=1                                                                                                 | VPS37B        |
| 457 | sp Q9NRW7 VPS45_HUMAN Vacuolar protein sorting-associated protein 45 OS=Homo sapiens (Human) OX=9606 GN=VPS45 PE=1 SV=1                                                                                                   | VPS45         |
| 458 | sp Q9UN37 VPS4A_HUMAN Vacuolar protein sorting-associated protein 4A OS=Homo sapiens (Human) OX=9606 GN=VPS4A PE=1 SV=1                                                                                                   | VPS4A         |
| 459 | sp Q8NI36 WDR36_HUMAN WD repeat-containing protein 36 OS=Homo sapiens (Human) OX=9606 GN=WDR36 PE=1 SV=1                                                                                                                  | WDR36         |
| 460 | sp Q9GZS3 WDR61_HUMAN WD repeat-containing protein 61 OS=Homo sapiens (Human) OX=9606 GN=WDR61 PE=1 SV=1                                                                                                                  | WDR61         |
| 461 | sp Q9NQW7 XPP1_HUMAN Xaa-Pro aminopeptidase 1 OS=Homo sapiens (Human) OX=9606 GN=XPNPEP1 PE=1 SV=3                                                                                                                        | XPNPEP1       |
| 462 | sp Q9NQH7 XPP3_HUMAN Xaa-Pro aminopeptidase 3 OS=Homo sapiens (Human) OX=9606 GN=XPNPEP3 PE=1 SV=1                                                                                                                        | XPNPEP3       |
| 463 | sp O14980 XPO1_HUMAN Exportin-1 OS=Homo sapiens (Human) OX=9606 GN=XPO1 PE=1 SV=1                                                                                                                                         | XPO1          |
| 464 | sp P67809 YBOX1_HUMAN Y-box-binding protein 1 OS=Homo sapiens (Human) OX=9606 GN=YBX1 PE=1 SV=3                                                                                                                           | YBX1          |
| 465 | sp Q5BJH7 YIF1B_HUMAN Protein YIF1B OS=Homo sapiens (Human) OX=9606 GN=YIF1B PE=1 SV=1                                                                                                                                    | YIF1B         |
| 466 | sp Q9GZMS YIPF3_HUMAN Protein YIPF3 OS=Homo sapiens (Human) OX=9606 GN=YIPF3 PE=1 SV=1                                                                                                                                    | YIPF3         |
| 467 | sp P49750 YLPM1_HUMAN YLP motif-containing protein 1 OS=Homo sapiens (Human) OX=9606 GN=YLPM1 PE=1 SV=4                                                                                                                   | YLPM1         |
| 468 | sp Q9Y5A9 YTHD2_HUMAN YTH domain-containing family protein 2 OS=Homo sapiens (Human) OX=9606 GN=YTHDF2 PE=1 SV=2                                                                                                          | YTHDF2        |
| 469 | sp Q7Z739 YTHD3_HUMAN YTH domain-containing family protein 3 OS=Homo sapiens (Human) OX=9606 GN=YTHDF3 PE=1 SV=1                                                                                                          | YTHDF3        |
| 470 | sp P62258 1433E_HUMAN 14-3-3 protein epsilon OS=Homo sapiens (Human) OX=9606 GN=YWHAE PE=1 SV=1                                                                                                                           | YWHAE         |
| 471 | sp Q14966 ZNF638_HUMAN Zinc finger protein 638 OS=Homo sapiens (Human) OX=9606 GN=ZNF638 PE=1 SV=2                                                                                                                        | ZNF638        |
| 472 | sp O43264 ZW10_HUMAN Centromere/kinetochore protein zw10 homolog OS=Homo sapiens (Human) OX=9606 GN=ZW10 PE=1 SV=3                                                                                                        | ZW10          |

**Table S4. RT-PCR primer sets**

| <b>name</b>     | <b>sequence (5'-3')</b>  |
|-----------------|--------------------------|
| PDL1Human_fw    | TGGCATTGCTGAACGCATTT     |
| PDL1Human_rev   | TGCAGCCAGGTCTAATTGTTTT   |
| human_gapdh_fw  | CTTCAACAGCGACACCCACTCCTC |
| human_gapdh_rev | GTCCACCACCCTGTTGCTGTAG   |
| hCMTM6 fw       | TTCCACACATGACAGGACTTC    |
| hCMTM6 rev      | GGCTTCAGCCCTAGTGGTAT     |
| hFOS_fw         | GCAAGGTGGAACAGTTATCTCCA  |
| hFOS_rev        | AGTGTATCAGTCAGCTCCCTCCTC |
| hMCL1_fw        | CGTTGTCTCGAGTGATGATCCA   |
| hMCL1_rev       | CAAGTGTTTAGCCACAAAGGCA   |
| hMMP3_fw        | ATGGCATTAGTCCCTCTATGG    |
| hMMP3_rev       | AAGCAGGATCACAGTTGGCTG    |
| hVCL_fw         | GCCAGGAATGACTAAGATGGCC   |
| hVCL_rev        | TTCACGGTGTTTCATCGAGTTCA  |
| hDKK1_fw        | GAAAACGCTGCATGCGTC       |
| hDKK1_rev       | GGTTTCCTCAATTTCTCCTCGG   |
| EGFR_fw         | AGGCACGAGTAACAAGCTCAC    |
| EGFR_rev        | ATGAGGACATAACCAGCCACC    |
